# Supplementary material
Source: publisher figshare collection journal article supplement (https://gsapubs.figshare.com/ndownloader/files/23309807)
Supplement: Supplementary file 1 [file 23309807]

## **Supplemental Materials for: Phanerozoic shallow marine sole marks and substrate evolution**

**Lidya G. Tarhan**

Department of Geology and Geophysics, Yale University, New Haven, CT 06511, USA;

[lidya.tarhan@yale.edu](mailto:lidya.tarhan@yale.edu)

### **METHODS**

Sole mark occurrence data were collected by means of a survey of all scientific literature archived to Google Scholar and GeoRef and containing one or more of the following terms: bounce mark (or cast), brush mark (cast), current crescent, crescent mark (cast), flute mark (cast), groove mark (cast), gutter mark (cast), Kullingia (scratch circle), pot mark (cast), prod mark (cast), skip mark (cast), sole mark (cast), swing mark, tool mark (cast). All papers meeting these criteria and archived up through March 2018 were surveyed. In total, 327 distinct formation-level units (described in 381 papers from the sedimentological, tectonic and paleontological literature), containing shallow marine, sole mark-bearing facies were catalogued by geologic formation. This search was confined to the English-language literature. Conference abstracts were included only in cases where detailed sedimentological information was provided. These successions represent a range of depositional environments, from shoreface, nearshore and deltaic systems to shelf, platform and upper slope settings. Only those studies from which the specific formation-level unit bearing sole marks, and the depositional setting thereof, could be identified were included. In rare instances, units lacking formation-level identifiers and described only by higher-order categories (e.g., lithosedimentary group, belt or basin) were included as

single entries—but only in such instances where, on the basis of age and geography, it was clear that there was no overlap with units already included in the database. Shallow marine units were further subdivided into two categories: 1) normal marine and lithified ( $n = 266$ ) and 2) restricted, emergent or unlithified ( $n = 61$ ). Subdivision into normal vs. non-normal marine was conducted in order to further elucidate first-order temporal trends in sole mark formation and preservation, by correcting for potential biases introduced by non-‘normal’-marine (restricted, brackish or periodically exposed) conditions associated with marginal marine settings, as these settings may (regardless of age) experience unusual environmental conditions (divorced from those of normal marine settings) promoting sediment cohesiveness. In addition, the small number of Quaternary shallow marine occurrences of sole structures were subdivided according to whether those sediments were lithified ( $n = 1$ ) or unlithified ( $n = 5$ ), as the unlithified sediments were, in most instances, modern seafloor sediments characterized by erosional gouges (incipient tool marks, flute marks and gutter casts) which had not yet been infilled or cast. As these have not yet experienced the ‘gauntlet’ of burial, preservation and lithification, unlithified Recent and modern (Quaternary) sediments were considered separately from lithified units. These literature data were also, for three units, supplemented by the author’s field-based sedimentological observations (e.g., Fig. 1; Supplementary Table 1; manuscripts in preparation). The age (to the level of Period), lithofacies, depositional environment and presence (and, where available, abundance and size) of all types of sole marks were noted (Supplementary Table 1).

Units crossing Period-level chronostratigraphic boundaries were assigned partial scores in each interval (e.g., an Ordovician–Silurian unit would be assigned an Ordovician score of 0.5 and a Silurian score of 0.5). Abundances of shallow marine formation-level units bearing sole marks

were tallied and subsequently normalized to global Phanerozoic Period-level and Era-level rock area estimates, using the metrics of Raup (1976) (Period-level and Era-level) (Fig. 2A, DR1A), Wall et al. (2009) (Period-level) (Fig. 2B) and Peters and Husson (2017) (Era-level) (Fig. DR1B). The Period-level rock area estimates reported by Raup (1976), which are currently among the most precise and widely used global Period-level rock area estimates available, were originally derived from the calculations of Blatt and Jones (1975) which those authors calculated through randomized sub-sampling of global rock area from geologic maps. As Raup (1976) used time bin durations (Lambert, 1971) different from current definitions, Raup's (1976) Period-level  $\text{km}^2/\text{yr}$  estimates were un-normalized to rock area ( $10^6 \text{ km}^2$ ) estimates. Time bin durations used in this study were derived from Gradstein et al. (2012). For comparison, raw abundance data were additionally normalized to the Period-level estimates of marine sedimentary rock area of Wall et al. (2009), which were derived by those authors from a large-scale compilation of UNESCO global geologic maps, supplemented by lithologic data (see Wall et al. (2009) for a detailed discussion of how these estimates were generated). Raw abundance data were also normalized to Era-level global rock area estimates (calculated from Period-level estimates) reported by Raup (1976), as well as to Era-level global rock area estimates reported by Peters and Husson (2017, fig. S4) and derived by the latter authors from USGS global geologic map data (<https://mrdata.usgs.gov/geology/world>). As the rock area estimates of Raup (1976), Wall et al. (2009) and Peters and Husson (2017) were based upon different geologic map datasets and derived using different methods, the absolute rock area values (and thus area-normalized formation abundances) of each scheme also differ. However, as for any normalization scheme, it is the comparison between time bins subjected to the same normalization method which is most relevant, and all employed normalization schemes resulted in the same general and statistically

robust temporal trend. Raup (1976) did not report estimates for Quaternary rock area, and Wall et al. (2009) did not report estimates for Pliocene or Quaternary rock area. Therefore, the six Quaternary shallow marine, sole mark-bearing units (five of which are unlithified and two of which are from restricted or emergent marginal marine settings) were not included in Fig. 2 or Fig. DR1A (but are included in Fig. DR1B and Fig. DR2), and the five Pliocene shallow marine, sole mark-bearing units were not included in Fig. 2B. Rock area was utilized as a normalization metric because rock area is inherently a factor of geologic time (e.g., time bin duration), sedimentary processes (e.g., the balance between sedimentation and erosion) and tectonic processes (e.g., subduction, accretion, crustal extension or contraction and uplift), all of which will substantially mediate the global areal extent of surviving outcrop available for survey. The overwhelming majority of sole mark identification occurs from field-based outcrop study (e.g., Supplementary Table 1 and references therein); therefore surficial rock area (rather than volumetric or mass-based metrics) was deemed the most appropriate metric for normalizing raw abundance data. Solely chronological normalization metrics (e.g., time bin duration; Fig. DR2) do not account for the influence of tectonic and sedimentary processes and are therefore subject to biases introduced by the ‘pull of the Recent’ (e.g., Pease, 1992; see Fig. DR2A), i.e., younger deposits have not yet experienced, relative to older successions, the geologic ‘culling’ associated with erosion, burial, lithification, tectonic deformation and subduction. Normalization to rock area is a widely employed method in the paleontological community, in which it has long been recognized that raw taxon abundance data will scale strongly to outcrop area (e.g., Pease, 1992; Wall et al., 2009; Close et al., 2017 and references therein). The temporal trends resulting from these calculations were further analyzed using regression analyses and Spearman rank-order

correlation coefficients in order to assess the extent of correlation between sole mark frequency and geologic age; this correlation was found to be robust and statistically significant.

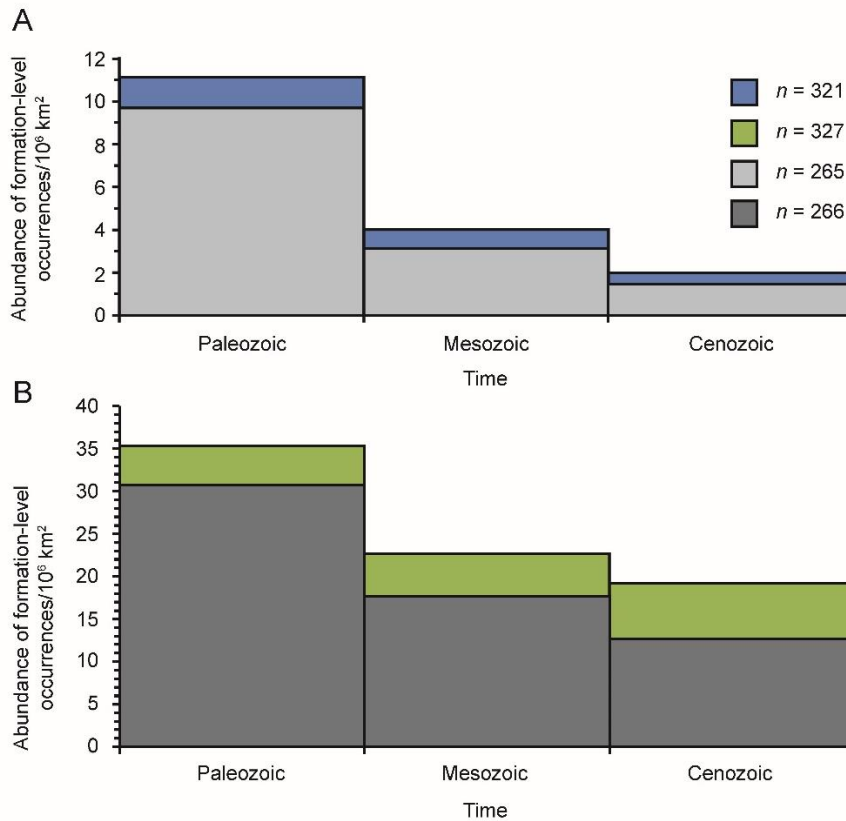

**Figure DR1.** Phanerozoic frequency of sole marks in shallow marine environments. Abundance of formation-level geologic units containing sole marks is reported, normalized to global rock area for each geologic Era. Blue and green histograms denote all shallow marine occurrences; gray histograms denote all shallow marine occurrences, excluding emergent and restricted settings and unlithified Quaternary sediments. Normalization to global rock area was calculated using the global rock area values reported in (A) Raup (1976) and (B) Peters and Husson (2017); the latter were derived from USGS global geologic map data (<https://mrdata.usgs.gov/geology/world>), as reported in Peters and Husson (2017, fig. S4).

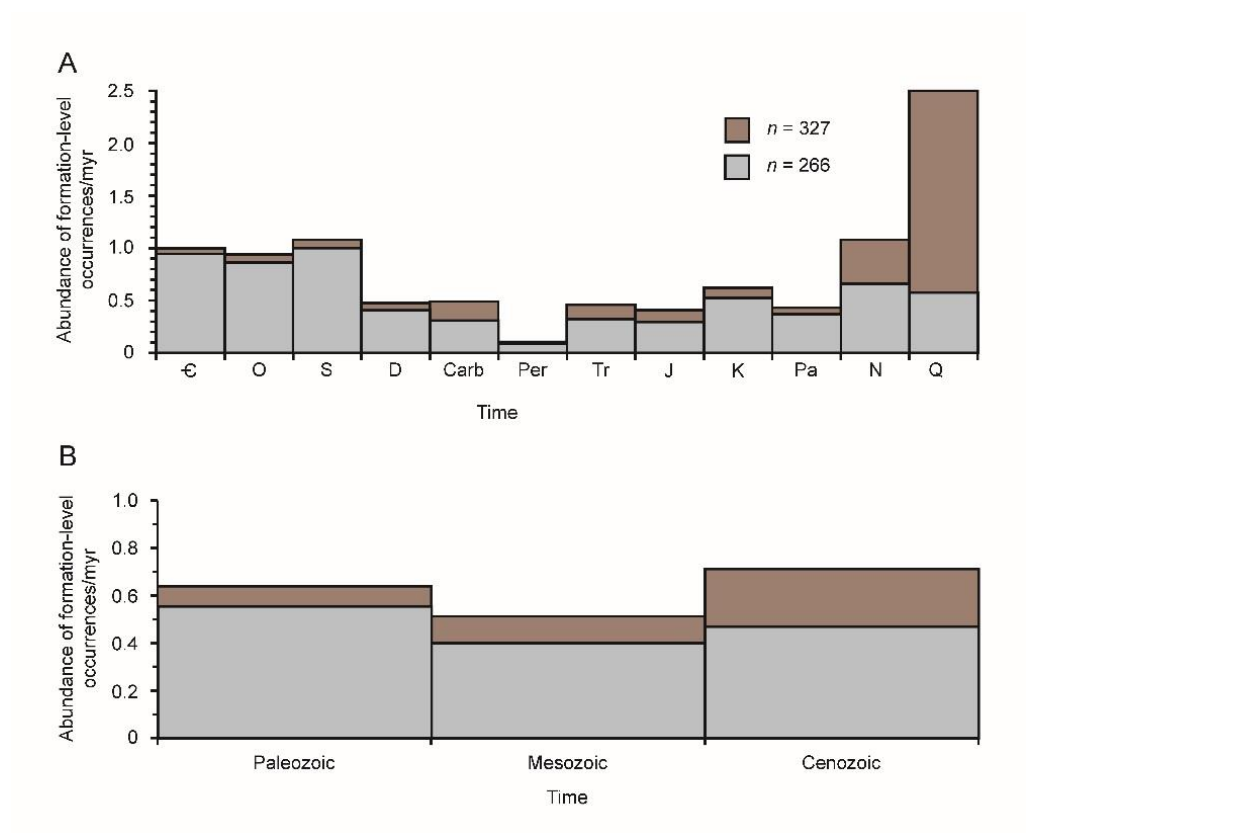

**Figure DR2.** Phanerozoic frequency of sole marks in shallow marine environments. Abundance of formation-level geologic units containing sole marks is reported, normalized to time bin duration, for each geologic Period (A) and Era (B). Brown histograms denote all shallow marine occurrences; gray histograms denote all shallow marine occurrences, excluding emergent and restricted settings and unlithified Quaternary sediments. Normalization to time bin duration was calculated using the values reported in Gradstein (2012). Recent (e.g., Quaternary) time-normalized abundances likely reflect the ‘pull of the Recent.’ See Fig. 2 in main text for Period abbreviations; Q, Quaternary.

**Table DR1.** Stratigraphic occurrences of Phanerozoic sole marks in shallow marine successions.

Table DR1. Phanerozoic shallow marine sole marks

| Geologic Period | Geography      | Geologic Unit                                       | Paleoenvironment                           | Sole Mark Type                                                                                                        | Sole Mark Density                 | Sole Mark Size                                               | Reference (Author, Year, Journal)                                                                                                                                                                                                                                                                                                                                            |
|-----------------|----------------|-----------------------------------------------------|--------------------------------------------|-----------------------------------------------------------------------------------------------------------------------|-----------------------------------|--------------------------------------------------------------|------------------------------------------------------------------------------------------------------------------------------------------------------------------------------------------------------------------------------------------------------------------------------------------------------------------------------------------------------------------------------|
| Cambrian        | USA            | Abrigo Formation                                    | Lower offshore, storm-dominated, above SWB | Gutter casts, tool marks                                                                                              | Present                           | Gutter casts 3-10 cm deep, 6-20 cm wide                      | Labaj and Pratt, 2016, <i>Journal of Sedimentary Research</i>                                                                                                                                                                                                                                                                                                                |
| Cambrian        | China          | Abuqiehai Formation                                 | Storm-dominated, offshore                  | Gutter casts                                                                                                          | Present to common                 |                                                              | Myrow et al., 2015, <i>Geological Society of America Bulletin</i>                                                                                                                                                                                                                                                                                                            |
| Cambrian        | USA            | Adams Argillite                                     | Shallow marine                             | Flute casts                                                                                                           | Present                           |                                                              | Gehrels et al., 1999, <i>Journal of Sedimentary Research</i> ; Demoulin and Harris, 2012, <i>AAPG Memoir</i>                                                                                                                                                                                                                                                                 |
| Cambrian        | Australia      | Arumbera Formation                                  | Deltaic, shelf                             | Tool marks, Kullingia (scratch circles), Arumberia (interpreted as flute mark)                                        | Present                           |                                                              | McIlroy and Heys, 1997, <i>Alcheringa</i> ; Droser et al., 2004, <i>Geological Society, London, Special Publication</i> ; Mapstone and McIlroy, 2006, <i>Precambrian Research</i>                                                                                                                                                                                            |
| Cambrian        | Canada         | Backbone Ranges Formation                           | Shelf, prodelta, between FWB and SWB       | Tool marks                                                                                                            | Present                           |                                                              | MacNaughton et al., 1997, <i>Journal of Sedimentary Research</i> ; MacNaughton and Narbonne, 1999, <i>Palaos</i>                                                                                                                                                                                                                                                             |
| Cambrian        | Sweden         | Borgholm Formation                                  | Shallow marine                             | Tool marks                                                                                                            | Abundant                          |                                                              | Calner and Eriksson, 2012, <i>SEPM Special Publication 101</i>                                                                                                                                                                                                                                                                                                               |
| Cambrian        | Norway         | Breidvika Formation                                 | Shallow marine                             | Tool marks                                                                                                            | Present                           |                                                              | McIlroy and Brasier, 2017, <i>Geological Society, London, Special Publication</i>                                                                                                                                                                                                                                                                                            |
| Cambrian        | Jordan         | Burj Formation                                      | Shallow marine                             | Flute marks                                                                                                           | Present                           |                                                              | Hofmann et al., 2012, <i>Journal of Paleontology</i>                                                                                                                                                                                                                                                                                                                         |
| Cambrian        | USA            | Cadiz Formation                                     | Subtidal, above WB                         | Tool marks, potential scratch circle                                                                                  | Present                           |                                                              | Waggoner and Collins, 1995, <i>Palaontologische Zeitschrift</i>                                                                                                                                                                                                                                                                                                              |
| Cambrian        | United Kingdom | Caered Mudstones and Flags (Gamlan Flags and Grits) | Shallow marine, proximal turbidites        | Flute casts, groove casts                                                                                             | Common                            |                                                              | Crimes, 1970, <i>Palaogeography, Palaeoclimatology, Palaeoecology</i>                                                                                                                                                                                                                                                                                                        |
| Cambrian        | United Kingdom | Caerfai Series                                      | Shallow marine                             | Flute casts, groove casts                                                                                             | Rare to present                   |                                                              | Crimes, 1970, <i>Palaogeography, Palaeoclimatology, Palaeoecology</i>                                                                                                                                                                                                                                                                                                        |
| Cambrian        | USA            | Campito Formation                                   | Shelf                                      | Flute casts, sole marks, tool marks                                                                                   | Present                           |                                                              | Mount, 1982, <i>Journal of Sedimentary Petrology</i>                                                                                                                                                                                                                                                                                                                         |
| Cambrian        | USA            | Carrara Formation                                   | Subtidal, shelf                            | Tool marks                                                                                                            | Rare to common (locally abundant) | Tool marks sub-mm- to mm-scale width, mm- to cm-scale length | Tarhan et al., 2015, <i>Nature Geoscience</i>                                                                                                                                                                                                                                                                                                                                |
| Cambrian        | China          | Chaomidian Formation                                | Storm-dominated platform                   | Gutter casts                                                                                                          | Abundant                          |                                                              | Chen, 2014, <i>Geologos</i>                                                                                                                                                                                                                                                                                                                                                  |
| Cambrian        | Canada         | Chapel Island Formation                             | Storm-dominated shallow marine             | Gutter casts, groove marks, pot casts, flute marks, prod marks, Kullingia (scratch circles), tool marks, gutter casts | Present to common                 |                                                              | Narbonne et al., 1991, <i>Journal of Paleontology</i> ; Myrow, 1992, <i>Journal of Sedimentary Petrology</i> ; Droser et al., 2002, <i>PNAS</i> ; Jensen et al., 2002, <i>Lethaia</i> ; Droser et al., 2004, <i>Geological Society, London, Special Publication</i> ; Mochizuki et al., 2014, <i>Journal of Paleontology</i> ; Tarhan et al., 2015, <i>Nature Geoscience</i> |
| Cambrian        | USA            | Deadwood Formation                                  | Shallow marine                             | Pot and gutter casts, tool marks                                                                                      | Present                           |                                                              | Pratt, 2002, <i>Geology</i>                                                                                                                                                                                                                                                                                                                                                  |
| Cambrian        | Iran           | Deh-Sufiyan Formation                               | Platform, subtidal, storm-dominated        | Gutter casts, pot casts                                                                                               | Present                           |                                                              | Bayet-Goll et al., 2015, <i>Facies</i>                                                                                                                                                                                                                                                                                                                                       |
| Cambrian        | South Africa   | Dolkraals Formation                                 | Wave-dominated shallow marine              | Flute marks, tool marks                                                                                               | Present                           |                                                              | Buatois et al., 2013, <i>Geology</i>                                                                                                                                                                                                                                                                                                                                         |
| Cambrian        | USA            | Dotsero Formation                                   | Storm-dominated inner detrital belt        | Sole marks (groove casts, prod casts), tool marks                                                                     | Abundant                          |                                                              | Myrow and Chen, 2015, <i>Sedimentology</i>                                                                                                                                                                                                                                                                                                                                   |
| Cambrian        | USA            | Erwin Formation                                     | Lower shoreface to storm-dominated shelf   | Tool marks, drag marks                                                                                                | Common                            |                                                              | Cudzil and Driese, 1987, <i>Sedimentology</i>                                                                                                                                                                                                                                                                                                                                |
| Cambrian        | Wales          | Ffestiniog Beds                                     | Shallow marine                             | Groove casts, flute casts                                                                                             | Rare (flutes) to common (grooves) |                                                              | Crimes, 1970, <i>Palaogeography, Palaeoclimatology, Palaeoecology</i>                                                                                                                                                                                                                                                                                                        |
| Cambrian        | Sweden         | Gislöv Formation                                    | High-energy, nearshore                     | Tool marks                                                                                                            | Present                           |                                                              | Álvarez et al., 2010, <i>Geological Magazine</i>                                                                                                                                                                                                                                                                                                                             |
| Cambrian        | USA            | Harkless Formation                                  | Shelf to ramp                              | Tool marks                                                                                                            | Common                            |                                                              | Ahn and Babcock, 2012, <i>Sedimentary Geology</i>                                                                                                                                                                                                                                                                                                                            |
| Cambrian        | Spain          | Herreria Formation                                  | Intertidal to subtidal                     | Flute casts, crescent marks, tool marks                                                                               | Present                           |                                                              | Owen, 1994, <i>Sedimentology</i> ; Álvarez et al., 2003, <i>Sedimentary Geology</i>                                                                                                                                                                                                                                                                                          |
| Cambrian        | Czech Republic | Holsiny-Horice Formation                            | Lagoonal                                   | Flute casts, skip marks, tool marks                                                                                   | Present                           |                                                              | Kukal, 1995, <i>Journal of the Czech Geological Society</i>                                                                                                                                                                                                                                                                                                                  |
| Cambrian        | Canada         | Ingta Formation                                     | Shelf, prodelta, between FWB and SWB       | Tool marks                                                                                                            | Present                           |                                                              | MacNaughton et al., 1997, <i>Journal of Sedimentary Research</i> ; MacNaughton et al., 1997, <i>Sedimentology</i> ; MacNaughton and Narbonne, 1999, <i>Palaos</i>                                                                                                                                                                                                            |
| Cambrian        | Ukraine        | Khmelnitskiy Formation                              | Shallow marine                             | Kullingia (scratch circles)                                                                                           | Present                           |                                                              | Droser et al., 2002, <i>PNAS</i> ; Jensen et al., 2002, <i>Lethaia</i> ; Droser et al., 2004, <i>Geological Society, London, Special Publication</i> ; Hogstrom et al., 2013, <i>Norwegian Journal of Geology</i>                                                                                                                                                            |
| Cambrian        | Canada         | King Square Formation                               | Inner to middle shelf                      | Medusichnites-type tool marks                                                                                         | Present                           |                                                              | Hagadorn and Miller, 2011, <i>Atlantic Geology</i>                                                                                                                                                                                                                                                                                                                           |
| Cambrian        | South Africa   | Klipbakk Formation                                  | Wave-dominated shallow marine              | Flute marks, tool marks                                                                                               | Present                           |                                                              | Buatois et al., 2013, <i>Geology</i>                                                                                                                                                                                                                                                                                                                                         |
| Cambrian        | India          | Kurgiah Formation                                   | Inner shelf, sub-FWB                       | Gutter casts                                                                                                          | Present                           |                                                              | Myrow et al., 2006, <i>Journal of Sedimentary Research</i>                                                                                                                                                                                                                                                                                                                   |
| Cambrian        | Argentina      | La Laja Formation                                   | Shallow subtidal                           | Gutter casts                                                                                                          | Rare                              |                                                              | Gomez et al., 2007, <i>Journal of Sedimentary Research</i>                                                                                                                                                                                                                                                                                                                   |
| Cambrian        | Canada         | Lake Louise Formation                               | Inner shelf                                | Gutter casts                                                                                                          | Present                           |                                                              | Desjardins et al., 2010, <i>Bulletin of Canadian Petroleum Geology</i> ; Johnston et al., 2017, <i>GSA Field Guide</i>                                                                                                                                                                                                                                                       |
| Cambrian        | USA            | Lodore Formation                                    | Shallow marine                             | Tools, gutter casts                                                                                                   | Present                           |                                                              | Myrow and Tarhan, 2016 field observations                                                                                                                                                                                                                                                                                                                                    |

Table DR1. Phanerozoic shallow marine sole marks

| Geologic Period     | Geography  | Geologic Unit                           | Paleoenvironment                                     | Sole Mark Type                                                                                                                          | Sole Mark Density                                      | Sole Mark Size                                              | Reference (Author, Year, Journal)                                                                                                                                                                                                                                    |
|---------------------|------------|-----------------------------------------|------------------------------------------------------|-----------------------------------------------------------------------------------------------------------------------------------------|--------------------------------------------------------|-------------------------------------------------------------|----------------------------------------------------------------------------------------------------------------------------------------------------------------------------------------------------------------------------------------------------------------------|
| Cambrian            | Pakistan   | Magnesian Sandstone                     | Shallow marine                                       | Kullingia (scratch circles)                                                                                                             | Present                                                |                                                             | Jensen et al., 2002, <i>Lethaia</i>                                                                                                                                                                                                                                  |
| Cambrian            | Wales      | Manganese Beds                          | Shallow marine, semi-restricted                      | Groove casts                                                                                                                            | Present                                                |                                                             | Crimes, 1970, <i>Palaeogeography, Palaeoclimatology, Palaeoecology</i>                                                                                                                                                                                               |
| Cambrian            | China      | Mantou Formation                        | Offshore, storm-dominated shallow marine             | Gutter casts                                                                                                                            | Common                                                 |                                                             | Chen and Lee, 2013, <i>Sedimentary Geology</i>                                                                                                                                                                                                                       |
| Cambrian            | Canada     | March Point Formation                   | Shallow marine                                       | Groove casts, Kullingia                                                                                                                 | Present                                                |                                                             | Tarhan, 2017, field observations                                                                                                                                                                                                                                     |
| Cambrian            | Antarctica | Mariner Formation                       | Shelf to platform                                    | Furrow flute marks, flutes, grooves                                                                                                     | Present                                                |                                                             | Andrews and Laird, 1976, <i>Sedimentary Geology</i>                                                                                                                                                                                                                  |
| Cambrian            | Sweden     | Mickwitzia Sandstone                    | Storm-dominated shelf                                | Flute casts, pot casts, gutter casts, tool marks (including Eophyton-type tool marks), prod marks, grooves, Kullingia (scratch circles) | Abundant (tool marks)                                  | Tools are sub-mm to mm-scale in width                       | Jensen, 1997, <i>Fossils and Strata</i> ; Droser et al., 2002, <i>PNAS</i> ; Jensen et al., 2002, <i>Lethaia</i> ; Droser et al., 2004, <i>Geological Society, London, Special Publication</i> ; Savazzi, 2015, <i>Paleontological Research</i>                      |
| Cambrian            | India      | Nagaur Sandstone                        | Shallow marine                                       | Current crescents                                                                                                                       | Present                                                |                                                             | Ahmad and Kumar, 2014, <i>Journal of the Palaeontological Society of India</i>                                                                                                                                                                                       |
| Cambrian            | Canada     | Nainlin Formation                       | Shallow to marginal marine, potentially emergent     | Flutes, tool marks                                                                                                                      | Present                                                |                                                             | MacNaughton and Fallas, 2014, <i>Bulletin of Canadian Petroleum Geology</i>                                                                                                                                                                                          |
| Cambrian            | USA        | Orr Formation                           | Shallow marine                                       | Gutter cast                                                                                                                             | Present                                                |                                                             | Evans, 2012, <i>AAPG Memoir</i> ; Miller et al., 2012, <i>AAPG Memoir</i>                                                                                                                                                                                            |
| Cambrian            | India      | Parahio Formation (Kunzum La Formation) | Deltaic                                              | Groove marks, pot casts, gutter casts, probable scratch circle, flute casts                                                             | Common (grooves)                                       |                                                             | Myrow et al., 2006, <i>Journal of Sedimentary Research</i> ; Upadhyay and Parcha, 2012, <i>Himalayan Geology</i> ; Hughes et al., 2013, <i>Journal of the Palaeontological Society of India</i>                                                                      |
| Cambrian            | Canada     | Petit Jardin Formation                  | Shallow marine                                       | Groove casts, gutter casts                                                                                                              | Locally abundant (grooves)                             |                                                             | Tarhan, 2017, field observations                                                                                                                                                                                                                                     |
| Cambrian            | USA        | Pioche Formation                        | Shelf, deltaic                                       | Tool marks                                                                                                                              | Common to abundant                                     |                                                             | Tarhan et al., 2015, <i>Nature Geoscience</i>                                                                                                                                                                                                                        |
| Cambrian            | Argentina  | Puncoviscana Formation                  | Shallow marine                                       | Flute casts, tool marks                                                                                                                 | Common                                                 |                                                             | Buatois and Mangano, 2012, <i>Journal of Paleontology</i>                                                                                                                                                                                                            |
| Cambrian            | China      | Qiongzhusi Formation                    | Deltaic, near SWB                                    | Flute casts, groove casts, tool marks                                                                                                   | Present                                                |                                                             | Hagadorn, 2002, in <i>Exceptional Fossil Preservation: A Unique View on the Evolution of Marine Life</i>                                                                                                                                                             |
| Cambrian            | Iran       | Soltanieh Formation                     | Distal tempestites, above SWB                        | Flute casts, tool marks                                                                                                                 | Common                                                 |                                                             | Shahkarami et al., 2017, <i>Palaeogeography, Palaeoclimatology, Palaeoecology</i>                                                                                                                                                                                    |
| Cambrian            | Antarctica | Springer Peak Formation                 | Shallow marine                                       | Flute casts                                                                                                                             | Present                                                |                                                             | Castillo et al., 2017, <i>Geological Society of America Bulletin</i>                                                                                                                                                                                                 |
| Cambrian            | Canada     | St. Piran Formation                     | Inner shelf to shallow subtidal                      | Gutter casts                                                                                                                            | Rare                                                   |                                                             | Desjardins et al., 2010, <i>Bulletin of Canadian Petroleum Geology</i>                                                                                                                                                                                               |
| Cambrian            | Antarctica | Starshot Formation                      | Shoreline, shelf, deltaic, wave- and storm-dominated | Flute marks, groove marks, prod marks                                                                                                   | Rare (groove and prod marks) to abundant (flute marks) |                                                             | Myrow et al., 2002, <i>Journal of Sedimentary Research</i> ; Goodge et al., 2004, <i>Geological Society of America Bulletin</i>                                                                                                                                      |
| Cambrian            | Sweden     | Tornetråsk Formation                    | Shallow marine                                       | Kullingia (scratch circles)                                                                                                             | Common                                                 |                                                             | Jensen and Grant, 1998, <i>Norsk Geologisk Tidsskrift</i> ; Droser et al., 2002, <i>PNAS</i> ; Jensen et al., 2002, <i>Lethaia</i> ; Droser et al., 2004, <i>Geological Society, London, Special Publication</i> ; Axheimer et al., 2007, <i>Geological Magazine</i> |
| Cambrian            | Spain      | Torreárboles Sandstone                  | Nearshore to shallow shelf                           | Tool marks                                                                                                                              | Common                                                 |                                                             | Tarhan et al., 2015, <i>Nature Geoscience</i>                                                                                                                                                                                                                        |
| Cambrian            | Australia  | Uratanna Formation                      | Shoreface to shelf                                   | Kullingia (scratch circles), flute casts, tool marks                                                                                    | Common (Kullingia)                                     |                                                             | Mount, 1993, <i>Sedimentology</i> ; Droser et al., 2002, <i>PNAS</i> ; Jensen et al., 2002, <i>Lethaia</i> ; Droser et al., 2004, <i>Geological Society, London, Special Publication</i> ; Tarhan et al., 2015, <i>Nature Geoscience</i>                             |
| Cambrian            | Canada     | Vampire Formation                       | Shelf, prodelta, between SWB and FWB                 | Tool marks                                                                                                                              | Present                                                |                                                             | MacNaughton et al., 1997, <i>Journal of Sedimentary Research</i> ; MacNaughton et al., 1997, <i>Sedimentology</i> ; MacNaughton and Narbonne, 1999, <i>Palaio</i>                                                                                                    |
| Cambrian-Ordovician | Oman       | Andam Formation                         | Storm-dominated shelf                                | Gutter casts                                                                                                                            | Rare to present                                        |                                                             | Millson et al., 2008, <i>AAPG Bulletin</i>                                                                                                                                                                                                                           |
| Cambrian-Ordovician | Ireland    | Shelmaliere Quartzite Formation         | Sub-shelf shallow marine                             | Flute casts                                                                                                                             | Rare                                                   |                                                             | Shannon, 1978, <i>Proceedings of the Royal Irish Academy. Section B: Biological, Geological, and Chemical Science</i>                                                                                                                                                |
| Ordovician          | Scotland   | Ardwell Flags                           | Shallow marine                                       | Flute casts                                                                                                                             | Present                                                |                                                             | Hubert, 1966, <i>Journal of Sedimentary Petrology</i>                                                                                                                                                                                                                |
| Ordovician          | Portugal   | Armorican Quartzite                     | Nearshore, above SWB                                 | Crescent casts                                                                                                                          | Locally abundant                                       | Crescent casts 4-13 cm wide, 2-6 cm long, up to 2 cm relief | Romano, 1974, <i>Comunicações dos Serviços Geológicos de Portugal</i>                                                                                                                                                                                                |
| Ordovician          | Scotland   | Barren Flags                            | Neritic                                              | Flute casts, groove casts                                                                                                               | Present                                                | Grooves up to several feet long                             | Hubert, 1966, <i>Journal of Sedimentary Petrology</i>                                                                                                                                                                                                                |
| Ordovician          | Canada     | Beach Formation                         | Wave-reworked fluvial-proximal shallow marine        | Gutter casts                                                                                                                            | Common                                                 | Mm-scale and "small" gutters                                | Harazim and McLroy, 2015, <i>Journal of Sedimentary Research</i>                                                                                                                                                                                                     |
| Ordovician          | USA        | Bigby Formation                         | Shallow marine                                       | Tool marks, gutter casts                                                                                                                | Common (tool marks)                                    |                                                             | Holland and Patzkowsky, 1997, <i>Journal of Sedimentary Research</i>                                                                                                                                                                                                 |
| Ordovician          | England    | Breadstone Shales                       | Shallow marine                                       | Groove casts, bounce casts                                                                                                              | Present                                                |                                                             | Curtis, 1968, <i>Proceedings of the Geologists' Association</i>                                                                                                                                                                                                      |



Table DR1. Phanerozoic shallow marine sole marks

| Geologic Period | Geography      | Geologic Unit                                                      | Paleoenvironment                                   | Sole Mark Type                                                                                                | Sole Mark Density         | Sole Mark Size                                               | Reference (Author, Year, Journal)                                                                                                                                                                                                                                                                                                                                                                                                             |
|-----------------|----------------|--------------------------------------------------------------------|----------------------------------------------------|---------------------------------------------------------------------------------------------------------------|---------------------------|--------------------------------------------------------------|-----------------------------------------------------------------------------------------------------------------------------------------------------------------------------------------------------------------------------------------------------------------------------------------------------------------------------------------------------------------------------------------------------------------------------------------------|
| Ordovician      | USA            | Fairview Formation                                                 | Shallow marine                                     | Gutter casts, tool marks (even on bed tops), groove structures                                                | Abundant                  |                                                              | Jennette and Pryor, 1993, <i>Journal of Sedimentary Petrology</i> ; McLaughlin and Brett, 2004, <i>Sedimentary Geology</i> ; Dattilo et al., 2008, <i>Canadian Journal of Earth Sciences</i> ; Brett et al., 2012, <i>GSA North-Central Section Fieldtrip</i> ; Smrecek and Brett, 2014, <i>Palaos</i>                                                                                                                                        |
| Ordovician      | USA            | Garrard Formation                                                  | Shallow marine                                     | Tool marks, groove structures                                                                                 | Common                    |                                                              | McLaughlin and Brett, 2004, <i>Sedimentary Geology</i>                                                                                                                                                                                                                                                                                                                                                                                        |
| Ordovician      | Canada         | Georgian Bay Formation                                             | Storm-dominated shelf, between FWB and SWB         | Gutter casts and tool marks (on bases of gutter casts)                                                        | Common (gutter casts)     | Gutter diameters 4-15 cm, up to 15 cm relief                 | Kerr and Eyles, 1991, <i>Canadian Journal of Earth Sciences</i>                                                                                                                                                                                                                                                                                                                                                                               |
| Ordovician      | USA            | Grant Lake Formation                                               | Storm-dominated shallow marine                     | Kullingia (scratch circles), aligned potential current features                                               | Present                   |                                                              | Brandt et al., 1995, <i>Journal of Paleontology</i> ; Jensen et al., 2002, <i>Lethaia</i>                                                                                                                                                                                                                                                                                                                                                     |
| Ordovician      | Libya          | Haouaz Formation                                                   | Lower delta plain, fluvially and tidally dominated | Groove casts, current crescents                                                                               | Common                    |                                                              | Vos, 1981, <i>Sedimentary Geology</i>                                                                                                                                                                                                                                                                                                                                                                                                         |
| Ordovician      | USA            | Hermitage Formation                                                | Shallow marine                                     | Tool marks, gutter casts                                                                                      | Common (tool marks)       |                                                              | Holland and Patzkowsky, 1997, <i>Journal of Sedimentary Research</i>                                                                                                                                                                                                                                                                                                                                                                          |
| Ordovician      | USA            | Juniata Formation                                                  | Deltaic                                            | Pot casts, tool marks                                                                                         | Present to common         |                                                              | Tarhan et al., 2015, <i>Nature Geoscience</i>                                                                                                                                                                                                                                                                                                                                                                                                 |
| Ordovician      | USA            | Kope Formation (Economy Beds of Eden Formation)                    | Shallow marine                                     | Epirelief and hyporelief tool marks, gutter casts, mud-filled scours, Kullingia (scratch circles), prod marks | Abundant                  |                                                              | Jennette and Pryor, 1993, <i>Journal of Sedimentary Petrology</i> ; Holland et al., 2000, <i>Palaos</i> ; Holland et al., 2001, <i>Palaos</i> ; Jensen et al., 2002, <i>Lethaia</i> ; Dattilo et al., 2008, <i>Canadian Journal of Earth Sciences</i> ; Kirchner and Brett, 2008, <i>Palaos</i> ; Brett et al., 2012, <i>GSA North-Central Section Fieldtrip</i> ; Smrecek and Brett, 2014, <i>Palaos</i> ; Meyer et al., 2016, <i>Palaos</i> |
| Ordovician      | Sweden         | Kyrkas Quartzite                                                   | Shelf                                              | Flute casts, groove marks, sole marks, tool marks                                                             | Common to abundant        |                                                              | Dahlqvist, 2004, <i>Geological Magazine</i>                                                                                                                                                                                                                                                                                                                                                                                                   |
| Ordovician      | China          | Lianglitage Formation                                              | Carbonate ramp                                     | Gutter casts                                                                                                  | Present                   |                                                              | Shen and Neuweiler, 2015, <i>Palaos</i>                                                                                                                                                                                                                                                                                                                                                                                                       |
| Ordovician      | USA            | Liberty Formation                                                  | Shallow marine                                     | Gutter casts                                                                                                  | Present                   |                                                              | Brett et al., 2012, <i>GSA North-Central Section Fieldtrip</i>                                                                                                                                                                                                                                                                                                                                                                                |
| Ordovician      | Canada         | Lindsay Formation                                                  | Shelf                                              | Gutter casts                                                                                                  | Present to locally common | Gutters up to 10 cm "across"                                 | Brett et al., 2006, <i>Palaos</i>                                                                                                                                                                                                                                                                                                                                                                                                             |
| Ordovician      | Spain          | Los Puertos Formation                                              | Shoreface, slope                                   | Flute marks, tool marks                                                                                       | Common                    |                                                              | Alvaro et al., 2009, <i>Geological Society, London, Special Publication</i>                                                                                                                                                                                                                                                                                                                                                                   |
| Ordovician      | Morocco        | Lower Ktaoua Formation                                             | Shallow marine                                     | "Flute cast-like sole marks"                                                                                  | Present                   |                                                              | Alvaro et al., 2007, <i>Palaeogeography, Palaeoclimatology, Palaeoecology</i>                                                                                                                                                                                                                                                                                                                                                                 |
| Ordovician      | USA            | Martinsburg Formation                                              | Platform, shelf                                    | Pot and gutter casts, tool marks                                                                              | Present                   |                                                              | Kreisa, 1981, <i>Journal of Sedimentary Petrology</i>                                                                                                                                                                                                                                                                                                                                                                                         |
| Ordovician      | United Kingdom | Micklewood Beds                                                    | Shallow marine                                     | Flute casts, groove casts, bounce casts                                                                       | Present                   |                                                              | Curtis, 1968, <i>Proceedings of the Geologists' Association</i>                                                                                                                                                                                                                                                                                                                                                                               |
| Ordovician      | Korea          | Mungok Formation                                                   | Storm-dominated, subtidal, mid- to outer ramp      | Gutter casts                                                                                                  | Present                   | Gutter casts cm-scale                                        | Kim et al., 2014, <i>Geosciences Journal</i>                                                                                                                                                                                                                                                                                                                                                                                                  |
| Ordovician      | USA            | Murfreesboro Formation (Ridley Formation, Upper Carters Limestone) | Peritidal                                          | Gutter casts                                                                                                  | Rare                      |                                                              | Holland and Patzkowsky, 1998, <i>Journal of Sedimentary Research</i>                                                                                                                                                                                                                                                                                                                                                                          |
| Ordovician      | Libya          | not specified (Murzuq Basin)                                       | Deltaic                                            | Flute casts, gutter casts                                                                                     | Present                   | Flute casts up to m-scale                                    | Girard et al., 2012, <i>Journal of Sedimentary Research</i>                                                                                                                                                                                                                                                                                                                                                                                   |
| Ordovician      | Argentina      | not specified (Santa Victoria Group)                               | Shelf                                              | Flute cast, groove cast, current crescent                                                                     | Present                   |                                                              | Moya, 1988, in <i>The Southern Central Andes</i>                                                                                                                                                                                                                                                                                                                                                                                              |
| Ordovician      | USA            | Pierce Limestone (Lebanon Limestone)                               | Subtidal shallow marine                            | Tool marks, gutter casts                                                                                      | Common                    |                                                              | Holland and Patzkowsky, 1998, <i>Journal of Sedimentary Research</i>                                                                                                                                                                                                                                                                                                                                                                          |
| Ordovician      | Canada         | Powers Steps Formation                                             | Storm-dominated nearshore, delta, shelf            | Tool marks                                                                                                    | Present to common         | Tool marks sub-mm- to mm-scale width, mm- to cm-scale length | Tarhan et al., 2014, <i>Memoirs of the Association of Australasian Palaeontologists</i>                                                                                                                                                                                                                                                                                                                                                       |
| Ordovician      | Canada         | Redmans Formation                                                  | Tidal flat and barrier bar                         | Current crescents                                                                                             | Present                   |                                                              | Ranger et al., 1984, <i>Canadian Journal of Earth Sciences</i>                                                                                                                                                                                                                                                                                                                                                                                |
| Ordovician      | Argentina      | Santa Rosita Formation                                             | Shallow marine                                     | Tool marks, gutter casts, pot casts                                                                           | Common                    |                                                              | Buatois and Mángano, 2003, <i>Journal of South American Earth Sciences</i> ; Mángano et al., 2005, <i>Ichnos</i> ; Balseira et al., 2011, <i>Lethaia</i> ; Tortello and Estaban, 2014, <i>Journal of Paleontology</i>                                                                                                                                                                                                                         |
| Ordovician      | India          | Shian Quartzite Formation                                          | Littoral                                           | Flute casts, sole marks                                                                                       | Present                   |                                                              | Bagati et al., 1991, <i>Sedimentary Geology</i>                                                                                                                                                                                                                                                                                                                                                                                               |
| Ordovician      | Portugal       | Sobrido Formation                                                  | Wave-influenced, open marine shelf                 | Groove casts                                                                                                  | Common                    |                                                              | Couto et al., 2013, <i>Palaeogeography, Palaeoclimatology, Palaeoecology</i>                                                                                                                                                                                                                                                                                                                                                                  |
| Ordovician      | Mexico         | Tiñu Formation                                                     | Storm-dominated shallow subtidal                   | Gutter casts                                                                                                  | Present                   |                                                              | Landing et al., 2007, <i>Geological Magazine</i>                                                                                                                                                                                                                                                                                                                                                                                              |
| Ordovician      | Belgium        | Unit 4: Lower Salmian (Stavelot Massif)                            | Shelf                                              | Grooves                                                                                                       | Present                   |                                                              | Lamens, 1985, <i>Sedimentary Geology</i>                                                                                                                                                                                                                                                                                                                                                                                                      |
| Ordovician      | Morocco        | Upper Tiouririne Formation                                         | Shallow marine                                     | Gutter casts, flute casts, groove casts                                                                       | Common                    |                                                              | Alvaro et al., 2007, <i>Palaeogeography, Palaeoclimatology, Palaeoecology</i>                                                                                                                                                                                                                                                                                                                                                                 |

Table DR1. Phanerozoic shallow marine sole marks

| Geologic Period     | Geography             | Geologic Unit                             | Paleoenvironment                                | Sole Mark Type                                                                                             | Sole Mark Density        | Sole Mark Size                                    | Reference (Author, Year, Journal)                                                                                                                                                     |
|---------------------|-----------------------|-------------------------------------------|-------------------------------------------------|------------------------------------------------------------------------------------------------------------|--------------------------|---------------------------------------------------|---------------------------------------------------------------------------------------------------------------------------------------------------------------------------------------|
| Ordovician          | Estonia               | Vasalemma Formation                       | Wave-reworked shelf                             | Eophyton-type tool marks                                                                                   | Rare to locally abundant | Tool ridges <1 mm diameter, 8-9 ridges per cm     | Vinn and Toom, 2016, <i>Neues Jahrbuch für Geologie und Paläontologie-Abhandlungen</i>                                                                                                |
| Ordovician          | United Kingdom        | Whitehouse Fm                             | Neritic, deltaic                                | Flute casts                                                                                                | Rare                     |                                                   | Hubert, 1966, <i>Journal of Sedimentary Petrology</i>                                                                                                                                 |
| Ordovician-Silurian | China                 | not specified (Kalpingtag Group)          | Lower shoreface, offshore, above SWB            | Tool marks, gutter casts                                                                                   | Common (gutter casts)    |                                                   | Liu and Zhang, 2008, <i>Proceedings of the 2008 International Workshop on Education Technology and Training and 2008 International Workshop on Geoscience and Remote Sensing</i>      |
| Silurian            | Libya                 | Akakus Formation                          | Shallow marine                                  | Gutter casts                                                                                               | Present                  |                                                   | Gindre et al., 2012, <i>Journal of African Earth Sciences</i>                                                                                                                         |
| Silurian            | USA                   | Clinch Formation                          | Storm-dominated shoreface                       | Pot casts, tool marks                                                                                      | Rare                     |                                                   | Tarhan et al., 2015, <i>Nature Geoscience</i>                                                                                                                                         |
| Silurian            | Canada                | Burtts Corner Beds (Kingsclear Group)     | Continental rise                                | Flute casts, tool marks                                                                                    | Present                  |                                                   | Whitehead, 2001, <i>NEIGC Field Guide</i>                                                                                                                                             |
| Silurian            | United Kingdom        | Coniston Grits                            | Shallow marine                                  | Flute casts, groove marks, sole marks                                                                      | Common                   |                                                   | Prentice, 1960, <i>The Journal of Geology</i>                                                                                                                                         |
| Silurian            | USA                   | Estill Shale                              | Open marine outer ramp                          | Skip marks, prod marks, gutter casts, flutes                                                               | Common                   |                                                   | McLaughlin et al., 2008, <i>GSA Field Guide</i>                                                                                                                                       |
| Silurian            | United Kingdom        | Gray Sandstone                            | Shelf, between FWB and SWB                      | Gutters, prod marks, groove marks, tool marks                                                              | Rare                     |                                                   | Hillier and Morrissey, 2010, <i>Geological Journal</i>                                                                                                                                |
| Silurian            | Canada                | Gun River Formation                       | Slightly below SWB                              | Gutter casts                                                                                               | Common                   |                                                   | Zhang et al., 2002, <i>Canadian Journal of Earth Sciences</i> ; Long, 2007, <i>Canadian Journal of Earth Sciences</i> ; Li and Allen, 2008, <i>Canadian Journal of Earth Sciences</i> |
| Silurian            | USA                   | Herkimer Formation                        | Shelf, between FWB and SWB                      | Tool marks                                                                                                 | Common to abundant       |                                                   | Tarhan et al., 2012, <i>Lethaia</i> ; Tarhan et al., 2015, <i>Nature Geoscience</i>                                                                                                   |
| Silurian            | Norway                | Holmestrand Formation                     | Beach, above FWB                                | Tool marks                                                                                                 | Present                  |                                                   | Dam and Andreasen, 1990, <i>Sedimentary Geology</i>                                                                                                                                   |
| Silurian            | United Kingdom        | Hughley Shales                            | Distal shelf                                    | Tool marks (groove marks, prod marks, bounce marks, pluck marks, in-out groove marks, prod-rotation marks) | Abundant                 |                                                   | Benton and Gray, 1981, <i>Journal of the Geological Society</i>                                                                                                                       |
| Silurian            | Canada                | Jupiter Formation                         | Storm-dominated mid-to outer ramp               | Sole marks (gutter casts)                                                                                  | Common                   |                                                   | Clayer, 2012, University of Ottawa MSc thesis; Clayer and Desrochers, 2014, <i>Estonian Journal of Earth Sciences</i>                                                                 |
| Silurian            | China                 | Kepingtage Formation                      | Storm-dominated shallow marine                  | Gutter casts                                                                                               | Present                  |                                                   | Zhao et al., 2016, <i>Arabian Journal of Geosciences</i>                                                                                                                              |
| Silurian            | Argentina             | Los Espejos Formation                     | Storm-dominated shelf, platform                 | Flute marks, tool marks, gutter casts, scour marks                                                         | Rare                     |                                                   | Sanchez et al., 1991, <i>Journal of South American Earth Sciences</i> ; Carrera et al., 2013, <i>Geological Journal</i>                                                               |
| Silurian            | Guinea, Guinea-Bissau | Lower Formation                           | Shallow marine, epicontinental                  | Groove casts, tool marks                                                                                   | Present                  |                                                   | Villeneuve and Komara, 1991, <i>Journal of African Earth Sciences</i>                                                                                                                 |
| Silurian            | USA                   | Mifflintown Formation                     | Storm-dominated ramp                            | Pot casts                                                                                                  | Rare                     |                                                   | Tarhan et al., 2015, <i>Nature Geoscience</i>                                                                                                                                         |
| Silurian            | United Kingdom        | not specified (Coralliferous Group)       | Shallow marine                                  | Sole marks, tool marks, prod marks, bounce marks                                                           | Present                  |                                                   | Hillier, 2002, <i>Geological Journal</i>                                                                                                                                              |
| Silurian            | Poland                | not specified (Eastern European Platform) | Outer shelf                                     | "Steep-sided scours similar to gutter casts"                                                               | Present                  |                                                   | Porebski et al., 2013, <i>Przegląd Geologiczny</i>                                                                                                                                    |
| Silurian            | USA                   | Red Mountain Formation                    | Storm-dominated shelf                           | Tool marks, groove casts                                                                                   | Present to common        |                                                   | Chowns and Rindsberg, 2015, <i>GSA Field Guide</i> ; Tarhan et al., 2015, <i>Nature Geoscience</i>                                                                                    |
| Silurian            | USA                   | Rockwood Formation                        | Storm-dominated mid-to outer shelf              | Pot casts, gutter casts, tool marks                                                                        | Common                   |                                                   | Tarhan et al., 2015, <i>Nature Geoscience</i>                                                                                                                                         |
| Silurian            | China                 | S1zh                                      | Deltaic                                         | Flute casts                                                                                                | Present                  |                                                   | Yao and Li, 2016, <i>Tectonophysics</i>                                                                                                                                               |
| Silurian            | China                 | S2+3+4zh                                  | Deltaic                                         | Flute casts                                                                                                | Present                  |                                                   | Yao and Li, 2016, <i>Tectonophysics</i>                                                                                                                                               |
| Silurian            | Norway                | Saelabonn Formation                       | Storm-dominated shelf                           | Gutter casts                                                                                               | Present                  |                                                   | Garten, 2012, University of Oslo M.S. thesis                                                                                                                                          |
| Silurian            | Libya                 | Tanezzuft Formation                       | Shallow marine                                  | Gutter casts                                                                                               | Present                  |                                                   | Gindre et al., 2012, <i>Journal of African Earth Sciences</i> ; Le Heron et al., 2013, <i>Journal of the Geological Society, London</i>                                               |
| Silurian            | USA                   | Tymochtee Formation                       | Intertidal                                      | Flute casts                                                                                                | Rare                     |                                                   | Kahle and Floyd, 1971, <i>Geological Society of America Bulletin</i>                                                                                                                  |
| Silurian            | USA                   | Wills Creek Formation                     | Storm-dominated shelf                           | Gutter casts                                                                                               | Present                  |                                                   | Haynes et al., 2014, <i>GSA Field Guide</i>                                                                                                                                           |
| Silurian            | United Kingdom        | Wych Beds                                 | Shelf                                           | Gutter casts, tool marks (grooves, prod casts)                                                             | Present                  | Gutters 20 cm wide, 7-9 cm deep; tools <1 cm long | Bridges, 1972, <i>Geological Magazine</i>                                                                                                                                             |
| Silurian-Devonian   | Argentina             | Rio Seco de los Castaños Formation        | Storm-dominated or turbiditic proximal platform | Flute marks                                                                                                | Rare                     |                                                   | Manassero et al., 2009, <i>Geological Society, London, Special Publication</i>                                                                                                        |
| Devonian            | Canada                | Battery Point Formation                   | Fluvial-influenced channel bar, tidal sand bar  | Flute marks, tool marks, gutter casts, current crescent scours                                             | Present                  |                                                   | Griffing et al., 2000, <i>Geological Society, London, Special Publication</i>                                                                                                         |
| Devonian            | USA                   | Canadaway Formation                       | Shallow marine                                  | Groove casts, prod casts, flute casts                                                                      | Present                  |                                                   | Copeland and Straffin, 2011, <i>NE-NC GSA Abstracts with Programs</i>                                                                                                                 |
| Devonian            | USA                   | Caneadea Formation                        | Storm-dominated nearshore, offshore             | Grooves, flute casts, gutter casts                                                                         | Common                   |                                                   | Smith and Jacobi, 2001, <i>AAPG Bulletin</i>                                                                                                                                          |
| Devonian            | USA                   | Catskill Formation                        | Deltaic                                         | Flute casts, groove casts                                                                                  | Abundant                 |                                                   | Leeper, 1963, <i>Pennsylvanian Geological Survey Series</i>                                                                                                                           |

Table DR1. Phanerozoic shallow marine sole marks

| Geologic Period | Geography      | Geologic Unit                                                  | Paleoenvironment                                          | Sole Mark Type                                                                                          | Sole Mark Density                                        | Sole Mark Size                               | Reference (Author, Year, Journal)                                                                                                                                                                        |
|-----------------|----------------|----------------------------------------------------------------|-----------------------------------------------------------|---------------------------------------------------------------------------------------------------------|----------------------------------------------------------|----------------------------------------------|----------------------------------------------------------------------------------------------------------------------------------------------------------------------------------------------------------|
| Devonian        | Canada         | Compton Formation                                              | Prodelta, deep shelf                                      | Flute casts                                                                                             | Present                                                  |                                              | Lavoie, 2004, <i>Canadian Journal of Earth Sciences</i>                                                                                                                                                  |
| Devonian        | Canada         | Escuminac Formation                                            | Estuarine, brackish                                       | Flute marks/casts, groove casts, brush casts, prod casts                                                | Abundant                                                 |                                              | Bourque et al., 2001, <i>Bulletin of Canadian Petroleum Geology</i> ; Wilson et al., 2005, <i>Journal of Paleontology</i>                                                                                |
| Devonian        | USA            | Foreknobs Formation                                            | Storm-influenced shoreface, proximal offshore, FWWB       | Flute casts, gutter casts                                                                               | Rare                                                     |                                              | McClung et al., 2013, <i>Palaeogeography, Palaeoclimatology, Palaeoecology</i>                                                                                                                           |
| Devonian        | USA            | Formation A                                                    | Shallow marine                                            | Groove casts                                                                                            | Present                                                  |                                              | Woodrow, 1963, <i>Pennsylvanian Geological Survey Series</i>                                                                                                                                             |
| Devonian        | USA            | Gilboa Formation                                               | Shallow marine                                            | Flute marks, tool marks                                                                                 | Present                                                  |                                              | Bridge and Willis, 1994, <i>Geological Society of America Bulletin</i>                                                                                                                                   |
| Devonian        | USA            | Grimes Sandstone                                               | Storm-dominated shallow marine                            | Prod marks, tool marks, pot casts, flutes, grooves                                                      | Common                                                   |                                              | Craft and Bridge, 1987, <i>Geological Society of America Bulletin</i>                                                                                                                                    |
| Devonian        | USA            | Hanover Formation                                              | Storm-mediated or turbiditic shelf                        | Gutter casts                                                                                            | Common                                                   |                                              | Smith and Jacobi, 2001, <i>AAPG Bulletin</i>                                                                                                                                                             |
| Devonian        | USA            | Hatch Formation                                                | Storm-dominated shallow marine                            | Flute marks, prods, tools                                                                               | Present                                                  | Flutes dm- to m-scale length, cm-scale width | Craft and Bridge, 1987, <i>Geological Society of America Bulletin</i>                                                                                                                                    |
| Devonian        | USA            | Ithaca Shale Formation                                         | Storm-dominated shelf                                     | Flute casts, gutter casts                                                                               | Present                                                  |                                              | Brennan et al., 2005, <i>Geological Society of America Abstracts with Programs</i>                                                                                                                       |
| Devonian        | United Kingdom | Jacket's Point Slate Formation                                 | Shelf margin                                              | Gutter casts                                                                                            | Common                                                   |                                              | Selwood and Thomas, 1986, <i>Journal of the Geological Society, London</i>                                                                                                                               |
| Devonian        | USA            | Jennings Formation (Chemung Formation)                         | Shallow marine, slope                                     | Flute casts, groove casts                                                                               | Rare                                                     |                                              | Leeper, 1963, <i>Pennsylvanian Geological Survey Series</i>                                                                                                                                              |
| Devonian        | USA            | Mahantango Formation                                           | Tide- and storm-dominated shallow marine foreland basin   | Sole marks                                                                                              | Rare to common                                           |                                              | Prave et al., 1996, <i>Sedimentology</i>                                                                                                                                                                 |
| Devonian        | Australia      | Mt. Ida Sandstone (Eildon Sandstone)                           | Shallow marine                                            | Flute marks, groove marks                                                                               | Present                                                  |                                              | Powell et al., 2003, <i>Tectonophysics</i>                                                                                                                                                               |
| Devonian        | Germany        | Nellenköpfchen Formation                                       | Shallow marine to brackish, intertidal, emergent          | Flute casts                                                                                             | Present                                                  |                                              | Wehrmann et al., 2005, <i>Palaio</i>                                                                                                                                                                     |
| Devonian        | China          | Niuerchuan Formation                                           | Shelf margin and tidal flats                              | Sole marks                                                                                              | Present                                                  |                                              | Yan et al., 2006, <i>International Geology Review</i>                                                                                                                                                    |
| Devonian        | Australia      | not specified (Walhalla Group)                                 | Storm-dominated shelf                                     | Flute marks, groove marks, gutter marks                                                                 | Common                                                   |                                              | Dyson, 1996, <i>Australian Journal of Earth Sciences</i>                                                                                                                                                 |
| Devonian        | USA            | Ohio Shale                                                     | Storm-dominated, sub-SWB shallow marine                   | Flute casts, groove casts, prod casts, sole marks                                                       | Rare (flutes and prods) to common and abundant (grooves) |                                              | Lewis, 1998, <i>Ohio Journal of Science</i> ; Alshahrani, 2013, Bowling Green State University M.S. thesis                                                                                               |
| Devonian        | Argentina      | Punta Negra Formation                                          | Prodelta, shelf (previously interpreted as submarine fan) | Flute casts, frondescant casts, sole marks, tool marks, grooves, prod casts, furrow casts, gutter casts | Rare to abundant (tools, grooves and prods)              |                                              | Gonzalez-Bonorino and Middleton, 1976, <i>Journal of Sedimentary Petrology</i> ; Basili et al., 2012, <i>Sedimentary Geology</i>                                                                         |
| Devonian        | Australia      | Roxburgh Formation                                             | Nearshore to outer shelf                                  | Flute marks, sole marks, tool marks                                                                     | Common (groove and tool marks)                           |                                              | Colquhoun, 1995, <i>Sedimentary Geology</i>                                                                                                                                                              |
| Devonian        | United Kingdom | Saltash Formation (Trevoise Slate Formation, Nordon Formation) | Shallow marine                                            | Gutter casts                                                                                            | Present                                                  |                                              | Leveridge and Hartley, 2006, in <i>The Geology of England and Wales</i>                                                                                                                                  |
| Devonian        | Brazil         | Sao Domingos Formation                                         | Shallow marine                                            | Tool marks (roll marks), groove marks                                                                   | Present                                                  |                                              | Horodyski et al., 2014, <i>International Journal of Earth Sciences</i>                                                                                                                                   |
| Devonian        | USA            | Scherr Formation                                               | Shoreface                                                 | Flute casts, tool marks                                                                                 | Present                                                  |                                              | Van Tassell, 1987, <i>Geological Society of America Bulletin</i>                                                                                                                                         |
| Devonian        | USA            | Triangle Formation                                             | Shallow marine                                            | Grooves, gutter casts                                                                                   | Present                                                  |                                              | Sutton et al., 1970, <i>Geological Society of America Bulletin</i> ; Schieber, 1999, <i>Journal of Sedimentary Research</i> ; Lazar et al., 2015, <i>SEPM Concepts in Sedimentology and Paleontology</i> |
| Devonian        | China          | Yangmaba Formation                                             | Storm-mediated shallow marine                             | Gutter casts, putative groove casts                                                                     | Present                                                  |                                              | Zhang, 2014, <i>Geological Journal</i> ; Li et al., 2017, <i>Palaeogeography, Palaeoclimatology, Palaeoecology</i>                                                                                       |
| Carboniferous   | Canada         | Albert Formation                                               | Wave-dominated delta-front, brackish embayment            | Flute casts, tool marks                                                                                 | Rare                                                     |                                              | Falcon-Lang, 2004, <i>Journal of the Geological Society, London</i>                                                                                                                                      |
| Carboniferous   | United Kingdom | Ashover Grit                                                   | Delta slope                                               | Flutes, tool marks                                                                                      | Present                                                  |                                              | Chisholm and Waters, 2012, <i>Proceedings of the Yorkshire Geological Society</i>                                                                                                                        |
| Carboniferous   | USA            | Crab Orchard Mountain Formation                                | Tidal flat                                                | Tool marks                                                                                              | Present                                                  |                                              | Schneek and Fritz, 1985, <i>Journal of Paleontology</i>                                                                                                                                                  |
| Carboniferous   | USA            | Cuyahoga Formation                                             | Sub-WB shallow marine                                     | Sole markings, tool marks                                                                               | Present                                                  |                                              | Richards, 1974, <i>The Ohio Journal of Science</i>                                                                                                                                                       |
| Carboniferous   | South Africa   | Floriskraal Formation                                          | Storm-dominated shallow marine                            | Gutter casts                                                                                            | Rare                                                     |                                              | Browning and Penn-Clarke, 2016, <i>South African Journal of Geology</i>                                                                                                                                  |
| Carboniferous   | USA            | Grainger Formation                                             | Deltaic                                                   | Groove casts, tool marks                                                                                | Rare to present to abundant                              |                                              | Robertson, 2014, Purdue University M.S. thesis                                                                                                                                                           |
| Carboniferous   | USA            | Holder Formation                                               | Inner shelf                                               | Flute casts, groove casts, sole marks, tool marks                                                       | Common                                                   |                                              | Carr and Scott, 1990, <i>Journal of Sedimentary Petrology</i>                                                                                                                                            |

Table DR1. Phanerozoic shallow marine sole marks

| Geologic Period       | Geography      | Geologic Unit                                      | Paleoenvironment                                         | Sole Mark Type                                                                                                                                 | Sole Mark Density              | Sole Mark Size                                | Reference (Author, Year, Journal)                                                                                                                                                                                                                                                         |
|-----------------------|----------------|----------------------------------------------------|----------------------------------------------------------|------------------------------------------------------------------------------------------------------------------------------------------------|--------------------------------|-----------------------------------------------|-------------------------------------------------------------------------------------------------------------------------------------------------------------------------------------------------------------------------------------------------------------------------------------------|
| Carboniferous         | Canada         | Horton Bluff Formation                             | Intertidal to shallow marine                             | Kullingia (scratch circles) [intertidal; Jensen et al., 2002], tool marks, gutter casts, groove casts [shallow marine; Mansky and Lucas, 2013] | Rare (gutter casts) to present |                                               | Jensen et al., 2002, <i>Lethaia</i> ; Rygel et al., 2006, <i>GSA Special Paper</i> ; Mansky and Lucas, 2013, in <i>The Carboniferous-Permian Transition</i>                                                                                                                               |
| Carboniferous         | United Kingdom | Huddersfield White Rock (Chatsworth Grit)          | Delta slope                                              | Flute marks, tool marks                                                                                                                        | Present                        |                                               | Waters et al., 2008, <i>Proceedings of the Yorkshire Geological Society</i>                                                                                                                                                                                                               |
| Carboniferous         | United Kingdom | Instow Beds                                        | Shallow marine                                           | Flute casts, groove marks, sole marks                                                                                                          | Common                         |                                               | Prentice, 1960, <i>The Journal of Geology</i>                                                                                                                                                                                                                                             |
| Carboniferous         | Canada         | Joggins Formation                                  | Storm- and hyperpynally influenced, brackish to emergent | Grooves, flutes                                                                                                                                | Present                        |                                               | Falcon-Lang, 2005, <i>Journal of the Geological Society, London</i>                                                                                                                                                                                                                       |
| Carboniferous         | USA            | Kanwaka Shale                                      | Intertidal                                               | Flute casts, tool marks, gutter casts, pot casts                                                                                               | Common (gutter and pot casts)  |                                               | Mangano et al., 1998, <i>Palaos</i>                                                                                                                                                                                                                                                       |
| Carboniferous         | South Africa   | Kweekvlei Formation                                | Storm-dominated offshore transition zone                 | Gutter casts                                                                                                                                   | Rare                           |                                               | Browning and Reid, 2017, <i>South African Journal of Geology</i>                                                                                                                                                                                                                          |
| Carboniferous         | Brazil         | Longa Formation                                    | Wave-influenced, deltaic                                 | Gutter casts                                                                                                                                   | Present                        |                                               | Playford et al., 2012, <i>Revista Española de Micropaleontología</i>                                                                                                                                                                                                                      |
| Carboniferous         | United Kingdom | Lower Limestone Formation                          | Prodelta to delta front                                  | Sole marks (flute casts, gutter casts)                                                                                                         | Present                        | Gutter casts deeply incised (e.g. 40 cm deep) | Fielding and Frank, 2015, <i>Palaeogeography, Palaeoclimatology, Palaeoecology</i>                                                                                                                                                                                                        |
| Carboniferous         | USA            | Minturn Formation                                  | Prodelta, hyperpynally influenced                        | Sole marks, grooves, prods, chevrons, flutes, gutter casts, tool marks, drag marks                                                             | Common to abundant             |                                               | Lamb et al., 2008, <i>Journal of Sedimentary Research</i> ; Myrow et al., 2008, <i>Journal of Sedimentary Research</i> ; Myrow et al., 2010, <i>Colorado College Field Guide</i>                                                                                                          |
| Carboniferous         | United Kingdom | Pathhead Formation                                 | Prodelta to delta front, estuarine                       | Sole marks (flute casts, gutter casts)                                                                                                         | Present                        |                                               | Fielding and Frank, 2015, <i>Palaeogeography, Palaeoclimatology, Palaeoecology</i>                                                                                                                                                                                                        |
| Carboniferous         | USA            | Pikeville Formation                                | Prodelta, delta front                                    | Flute marks, tool marks                                                                                                                        | Present                        |                                               | Jerrett et al., 2016, <i>Geological Society of America Bulletin</i>                                                                                                                                                                                                                       |
| Carboniferous         | USA            | Pottsville Formation                               | Tidal flat, estuarine, brackish                          | Tool marks                                                                                                                                     | Present                        |                                               | Demko and Gastaldo, 1996, <i>International Journal of Coal Geology</i>                                                                                                                                                                                                                    |
| Carboniferous         | USA            | Price Formation                                    | Nearshore to outer shelf                                 | Flute marks, tool marks, gutter casts, Kullingia (scratch circles)                                                                             | Present                        |                                               | Murphy, 2001, West Virginia University M.S. thesis; Jensen et al., 2002, <i>Lethaia</i>                                                                                                                                                                                                   |
| Carboniferous         | USA            | Pride Mountain Formation                           | Beach/shoreface                                          | Kullingia (scratch circles)                                                                                                                    | Present                        |                                               | Jensen et al., 2002, <i>Lethaia</i>                                                                                                                                                                                                                                                       |
| Carboniferous         | China          | Qijiagou Formation                                 | Shallow marine                                           | Flute casts                                                                                                                                    | Rare                           |                                               | Carroll et al., 1995, <i>Geological Society of America Bulletin</i>                                                                                                                                                                                                                       |
| Carboniferous         | United Kingdom | Sandy Craig Formation                              | Shallow marine, estuarine                                | Gutter casts                                                                                                                                   | Present                        |                                               | Fielding and Frank, 2015, <i>Palaeogeography, Palaeoclimatology, Palaeoecology</i>                                                                                                                                                                                                        |
| Carboniferous         | USA            | Stranger Formation                                 | Fluvio-estuarine, tidal flat                             | Tool marks, stick marks, drag marks, prod marks, groove marks                                                                                  | Present                        |                                               | Lanier et al., 1993, <i>Journal of Sedimentary Petrology</i> ; Buatois et al., 1997, <i>Palaos</i> ; Buatois et al., 1998, <i>Journal of Paleontology</i> ; Mangano and Buatois, 2004, <i>Geological Society, London, Special Publication</i>                                             |
| Carboniferous         | Morocco        | Unit 4                                             | Outer shelf to upper slope                               | Grooves                                                                                                                                        | Present                        |                                               | Graham, 1982, <i>Sedimentary Geology</i>                                                                                                                                                                                                                                                  |
| Carboniferous         | Morocco        | Unit 5                                             | Shelf                                                    | Tool marks, flute marks, grooves                                                                                                               | Present                        |                                               | Graham, 1982, <i>Sedimentary Geology</i>                                                                                                                                                                                                                                                  |
| Carboniferous         | Morocco        | Unit 6                                             | Shelf                                                    | Tool marks                                                                                                                                     | Present                        |                                               | Graham, 1982, <i>Sedimentary Geology</i>                                                                                                                                                                                                                                                  |
| Carboniferous         | USA            | Wann Formation                                     | Shallow marine, likely emergent                          | Flute casts, tool marks                                                                                                                        | Present                        |                                               | Scott, 2015, <i>SC Geological Society of America Abstracts with Programs</i>                                                                                                                                                                                                              |
| Carboniferous-Permian | South Africa   | not specified (Dwyka Group)                        | Shallow marine, glaciomarine                             | Grooves                                                                                                                                        | Present to common              |                                               | Blignault and Theron, 2012, <i>South African Journal of Geology</i>                                                                                                                                                                                                                       |
| Carboniferous-Permian | Russia         | not specified (Konduvka and Novogafarovo sections) | Storm-dominated middle-outer ramp                        | Flute marks, tool marks (SS3), flute marks (WPGc)                                                                                              | Rare                           |                                               | Schiappa and Snyder, 1998, <i>Permophiles</i>                                                                                                                                                                                                                                             |
| Carboniferous-Permian | India          | Talchir Formation                                  | Shallow marine, glaciomarine                             | Sole marks (gutter casts, flute casts, groove marks, prod marks, bounce marks)                                                                 | Present                        |                                               | Bhattacharya et al., 2004, <i>Sedimentary Geology</i> ; Bhattacharya et al., 2007, <i>Journal of the Geological Society of India</i> ; Bhattacharya and Bhattacharya, 2011, <i>Indian Journal of Geosciences</i> ; Bhattacharya and Bhattacharya, 2015, <i>Journal of Palaeogeography</i> |
| Permian               | United Kingdom | Brotherton Formation                               | Storm-dominated platform, shelf                          | Gutter casts                                                                                                                                   | Present to common              |                                               | McKie, 1994, <i>Sedimentary Geology</i>                                                                                                                                                                                                                                                   |
| Permian               | USA            | Robledo Mountains Formation                        | Tidal flat                                               | Pot casts, scratch circles                                                                                                                     | Common (pot casts)             |                                               | Lerner and Lucas, 2015, in <i>Carboniferous-Permian Transition in the Robledo Mountains, Southern New Mexico</i>                                                                                                                                                                          |
| Permian               | South Africa   | Waterford Formation                                | Shallow marine (shelf and upper slope)                   | Flute casts, groove marks                                                                                                                      | Present                        |                                               | Poyatos-Moré et al., 2016, <i>Journal of Sedimentary Research</i>                                                                                                                                                                                                                         |
| Permian-Triassic      | Greenland      | Wordie Creek Formation                             | Shallow marine                                           | Gutter casts                                                                                                                                   | Present                        |                                               | Twitcheit et al., 2001, <i>Geology</i>                                                                                                                                                                                                                                                    |

Table DR1. Phanerozoic shallow marine sole marks

| Geologic Period | Geography               | Geologic Unit                                        | Paleoenvironment                                                    | Sole Mark Type                                                                                                           | Sole Mark Density                                         | Sole Mark Size                      | Reference (Author, Year, Journal)                                                                                                                                                                        |
|-----------------|-------------------------|------------------------------------------------------|---------------------------------------------------------------------|--------------------------------------------------------------------------------------------------------------------------|-----------------------------------------------------------|-------------------------------------|----------------------------------------------------------------------------------------------------------------------------------------------------------------------------------------------------------|
| Triassic        | USA                     | Unit C (Thaynes Group)                               | Lower shoreface to offshore, mid- to outer ramp                     | Gutter casts                                                                                                             | Present                                                   |                                     | Hofmann et al., 2013, <i>Acta Palaeontologica Polonica</i> ; Vennin et al., 2015, <i>Sedimentology</i>                                                                                                   |
| Triassic        | USA                     | Andorno Formation                                    | Shallow marine                                                      | Flute casts                                                                                                              | Common                                                    |                                     | Compton, 1960, <i>Geological Society of America Bulletin</i>                                                                                                                                             |
| Triassic        | China                   | Baifeng Formation                                    | Storm-dominated shallow marine                                      | Gutter casts, "flute imprints"                                                                                           | Present                                                   |                                     | Wang et al., 2017, <i>Sedimentary Geology</i>                                                                                                                                                            |
| Triassic        | Spain                   | Cehegin Formation (Majanillos Formation)             | Nearshore bypass zone, ramp                                         | Pot casts, gutter casts (with coarse and bioclastic infill)                                                              | Present                                                   |                                     | Perez-Lopez, 2001, <i>Sedimentology</i> ; Perez-Lopez and Perez-Valera, 2012, <i>Sedimentology</i>                                                                                                       |
| Triassic        | Denmark                 | Gassum Formation                                     | Lower shoreface, sub-FWWB                                           | Gutter casts                                                                                                             | Common                                                    |                                     | Hamberg and Nielsen, 2000, <i>Geological Society, London, Special Publication</i>                                                                                                                        |
| Triassic        | USA                     | Ivishak Formation                                    | Shelf                                                               | Tool marks                                                                                                               | Present                                                   |                                     | Harun, 1987, <i>Alaska Division of Mining and Geological and Geophysical Surveys</i>                                                                                                                     |
| Triassic        | Germany                 | Jena Formation                                       | Tidal flat                                                          | Gutter casts                                                                                                             | Present                                                   |                                     | Knaust, 2013, <i>Earth-Science Reviews</i>                                                                                                                                                               |
| Triassic        | Australia               | Kockatea Shale Formation                             | Shallow marine                                                      | Tool marks                                                                                                               | Common                                                    |                                     | Chen et al., 2012, <i>Gondwana Research</i>                                                                                                                                                              |
| Triassic        | Germany, United Kingdom | Lower Keuper Formation                               | Storm-dominated, proximal to intermediate shelf, brackish nearshore | Tool marks, gutter casts (Germany); flute casts, groove casts, ctenoid casts (essentially bounce marks) (United Kingdom) | Rare (flutes, ctenoid casts) to common (gutters, grooves) |                                     | Cummins, 1961, <i>Geological Journal</i> ; Pöppelreiter and Aigner, 2003, <i>AAPG Bulletin</i>                                                                                                           |
| Triassic        | Germany                 | Meissner Formation                                   | Shallow marine                                                      | Flute casts, pot casts                                                                                                   | Present                                                   |                                     | Knaust, 2013, <i>Earth-Science Reviews</i>                                                                                                                                                               |
| Triassic        | USA                     | Moenkopi Formation                                   | Tidal flat, deltaic, brackish embayment                             | Sole marks, tool marks, flute marks, current crescents, gutter casts                                                     | Present                                                   |                                     | Reif and Slatt, 1979, <i>Journal of Sedimentary Petrology</i> ; Blakey, 1989, <i>Arizona Geological Society Digest</i> ; Twitchett et al., 2005, <i>Palaos</i> ; Thomson, 2014, UC Riverside M.S. Thesis |
| Triassic        | Canada                  | Montney Formation                                    | Offshore-shoreface transition zone, sub-FWWB, dysoxic               | Flute marks, tool marks (groove marks and brush marks)                                                                   | Present to common (tools)                                 |                                     | Zonneveld et al., 2010, <i>Bulletin of Canadian Petroleum Geology</i> ; Zonneveld et al., 2010, <i>Palaos</i>                                                                                            |
| Triassic        | Germany, Netherlands    | Muschelkalk Formation                                | Storm-reworked, lagoonal, intertidal, emergent                      | Pot casts, gutter casts, tool marks                                                                                      | Present to common                                         |                                     | Knaust and Langbein, 1995, <i>Facies</i> ; Knaust, 2002, <i>Journal of Paleontology</i> ; Borkhataria et al., 2006, <i>AAPG Bulletin</i> ; Knaust, 2007, <i>SEPM Special Publication</i>                 |
| Triassic        | Iran                    | Nayband Formation                                    | Storm-influenced mid-ramp                                           | Flute casts                                                                                                              | Present                                                   |                                     | Fürsich et al., 2007, <i>Palaos</i>                                                                                                                                                                      |
| Triassic        | Turkey                  | not specified (Bolkar nappe)                         | Nearshore                                                           | prod/groove marks                                                                                                        | Present                                                   |                                     | Mackintosh and Robertson, 2012, <i>Gondwana Research</i>                                                                                                                                                 |
| Triassic        | Spain                   | Pont de Suert Formation                              | Intertidal                                                          | Kullingia/Scharckreise (scratch circles)                                                                                 | Present                                                   |                                     | Dixon, 1987, <i>Proceedings of the Geologists' Association</i> ; Jensen et al., 2002, <i>Lethaia</i>                                                                                                     |
| Triassic        | USA                     | Red Peak Formation                                   | Shallow marine                                                      | Flute marks, tool marks                                                                                                  | Rare                                                      |                                     | Picard and High, 1968, <i>Journal of Sedimentary Petrology</i>                                                                                                                                           |
| Triassic        | Canada                  | Toad Formation                                       | Storm-influenced, between FWWB and sub-SWB                          | Tool marks, flute casts, pot casts, gutter casts                                                                         | Rare to common                                            |                                     | MacNaughton, 2002, <i>Geological Survey of Canada, Current Research</i> ; Utting et al., 2005, <i>Bulletin of Canadian Petroleum Geology</i>                                                             |
| Triassic        | Spain                   | Tramacastilla Dolostones Formation (Siles Formation) | Offshore transition zone                                            | Gutter marks/casts, pot casts                                                                                            | Present                                                   |                                     | Rodriguez-Tovar and Perez-Valera, 2008, <i>Palaos</i> ; Perez-Lopez and Perez-Valera, 2012, <i>Sedimentology</i> ; Sanchez-Moya et al., 2016, <i>Journal of Iberian Geology</i>                          |
| Triassic        | Norway                  | Vardebukta Formation                                 | Storm-mediated, hyperpynally influenced shoreface; dysoxic          | Flute marks                                                                                                              | Rare                                                      |                                     | Wignall et al., 2016, <i>Geological Magazine</i>                                                                                                                                                         |
| Triassic        | USA                     | Virgin Formation                                     | Storm-dominated lower shoreface to offshore                         | Gutter casts                                                                                                             | Present                                                   |                                     | Hofmann et al., 2013, <i>Acta Palaeontologica Polonica</i>                                                                                                                                               |
| Triassic        | Italy                   | Werfen Formation                                     | Ramp                                                                | Gutter casts, multidirectional tool marks                                                                                | Present                                                   |                                     | Wignall and Twitchett, 1999, <i>Sedimentology</i> ; Twitchett et al., 2005, <i>Palaos</i> ; Baucon and Neto de Carvalho, 2016, <i>Palaos</i>                                                             |
| Triassic        | United Kingdom          | Westbury Formation                                   | Shallow marine                                                      | Gutter casts, groove marks, tool marks                                                                                   | Locally abundant (grooves and tools)                      | Sub-mm-scale width, mm-scale length | Wright and Benton, 1987, <i>Palaeontology</i> ; Radley, 2011, <i>Geoscience in South-West England</i>                                                                                                    |
| Jurassic        | United Kingdom          | Blue Lias Formation                                  | Storm-dominated shallow marine, sub-SWB                             | Gutter casts                                                                                                             | Present                                                   |                                     | Radley, 2008, <i>Palaeogeography, Palaeoclimatology, Palaeoecology</i>                                                                                                                                   |
| Jurassic        | USA                     | Carmel Formation                                     | Marginal marine, tidal flat, lacustrine influence                   | Sole marks, tool marks                                                                                                   | Present                                                   |                                     | Blakey, 1989, in <i>Geologic Evolution of Arizona</i>                                                                                                                                                    |
| Jurassic        | India                   | Chari Formation                                      | Shallow marine                                                      | Flute casts, tool marks                                                                                                  | Present                                                   |                                     | Fürsich and Oschmann, 1993, <i>Journal of the Geological Society, London</i> ; Fürsich et al., 2004, <i>Rivista Italiana di Paleontologia e Stratigrafia</i>                                             |

Table DR1. Phanerozoic shallow marine sole marks

| Geologic Period     | Geography      | Geologic Unit                       | Paleoenvironment                                              | Sole Mark Type                                                                          | Sole Mark Density                                  | Sole Mark Size                                                     | Reference (Author, Year, Journal)                                                                                                                                                                                                                                                                                                                                                                                            |
|---------------------|----------------|-------------------------------------|---------------------------------------------------------------|-----------------------------------------------------------------------------------------|----------------------------------------------------|--------------------------------------------------------------------|------------------------------------------------------------------------------------------------------------------------------------------------------------------------------------------------------------------------------------------------------------------------------------------------------------------------------------------------------------------------------------------------------------------------------|
| Jurassic            | United Kingdom | Cleveland Ironstone Formation       | Storm-dominated shelf                                         | Gutter casts, groove casts                                                              | Common (gutter casts)                              | Gutters up to 5 m long, 5-50 cm diameter, up to 20 cm relief       | Greensmith et al., 1980, <i>Proceedings of the Yorkshire Geological Society</i> ; Hallam, 1997, <i>Journal of the Geological Society, London</i> ; Powell, 2010, <i>Proceedings of the Yorkshire Geological Society</i> ; Aplin and Macquaker, 2011, <i>AAPG Bulletin</i> ; Ghadeer and Macquaker, 2011, <i>Journal of the Geological Society, London</i> ; Bohacs et al., 2014, <i>Geology</i>                              |
| Jurassic            | Iran           | Dalichai Formation                  | Lower shelf                                                   | Flute casts, groove casts                                                               | Present                                            |                                                                    | Fürsich et al., 2007, <i>Palaaios</i>                                                                                                                                                                                                                                                                                                                                                                                        |
| Jurassic            | Uzbekistan     | Degibadam Formation                 | Storm-influenced outer ramp                                   | Flute casts, tool marks, gutter casts                                                   | Common                                             |                                                                    | Fürsich et al., 2017, <i>Geological Society, London, Special Publications</i>                                                                                                                                                                                                                                                                                                                                                |
| Jurassic            | Canada         | Fernie Formation                    | Shelf                                                         | Flute marks, tool marks (plant-mediated drag, prod, skip marks), fluted burrow marks    | Abundant                                           |                                                                    | Chough et al., 1998, <i>Geoscience Journal</i>                                                                                                                                                                                                                                                                                                                                                                               |
| Jurassic            | USA            | Formation A                         | Shallow marine                                                | Flute casts, groove casts                                                               | Rare                                               |                                                                    | Ojakangas, 1968, <i>Geological Society of America Bulletin</i>                                                                                                                                                                                                                                                                                                                                                               |
| Jurassic            | India          | Jhuran Formation (Katrol Formation) | Storm-influenced shallow marine                               | Tool marks, gutter casts, flute casts, sole marks, prod marks, groove casts, skip marks | Common to abundant (with exception of flute casts) | Average gutter cast size: 16 cm long, 5 cm deep                    | Arora et al., 2015, <i>Journal of the Geological Society of India</i>                                                                                                                                                                                                                                                                                                                                                        |
| Jurassic            | Iran           | Kashafrud Formation                 | Storm-influenced, turbidite-influenced sub-SWB shallow marine | Flute casts, groove casts                                                               | Present                                            |                                                                    | Fürsich et al., 2007, <i>Palaaios</i>                                                                                                                                                                                                                                                                                                                                                                                        |
| Jurassic            | United Kingdom | Kimmeridge Clay                     | Deep shelf, dysoxic                                           | Gutter casts                                                                            | Rare                                               |                                                                    | Wignall, 1989, <i>Journal of the Geological Society, London</i>                                                                                                                                                                                                                                                                                                                                                              |
| Jurassic            | Pakistan       | Loralai Formation                   | Shallow marine                                                | Flute casts, sole marks                                                                 | Present                                            |                                                                    | Durrani et al., 2012, <i>Journal of Himalayan Earth Sciences</i>                                                                                                                                                                                                                                                                                                                                                             |
| Jurassic            | Russia         | Mount Indyuk Formation              | Shelf, between FWB and SWB                                    | Grooves, flute marks                                                                    | Present                                            |                                                                    | McCannn et al., 2010, <i>Geological Society, London, Special Publication</i>                                                                                                                                                                                                                                                                                                                                                 |
| Jurassic            | Switzerland    | Opalinuston Formation               | Storm-influenced, ~SWB, epicontinental                        | Pot casts                                                                               | Present                                            |                                                                    | Wetzel and Meyer, 2006, <i>Palaaios</i>                                                                                                                                                                                                                                                                                                                                                                                      |
| Jurassic            | United Kingdom | Redcar Mudstone Formation           | Shallow marine                                                | Gutter casts                                                                            | Present                                            |                                                                    | Powell, 2010, <i>Proceedings of the Yorkshire Geological Society</i>                                                                                                                                                                                                                                                                                                                                                         |
| Jurassic            | Iran           | Shemshak Formation                  | Storm-influenced prodelta to delta front, sub-SWB             | Flute casts, groove casts                                                               | Present                                            |                                                                    | Fürsich et al., 2007, <i>Palaaios</i>                                                                                                                                                                                                                                                                                                                                                                                        |
| Jurassic            | Germany        | Solnhofen Formation                 | Lagoonal, tidal                                               | Tool marks, roll marks                                                                  | Present                                            |                                                                    | Adler and Roper, 2012, <i>Neues Jahrbuch für Geologie und Paläontologie-Abhandlungen</i>                                                                                                                                                                                                                                                                                                                                     |
| Jurassic            | United Kingdom | Staithe Sandstone Formation         | Offshore, shelf, sub-FWB                                      | Gutter casts                                                                            | Present                                            |                                                                    | Powell, 2010, <i>Proceedings of the Yorkshire Geological Society</i>                                                                                                                                                                                                                                                                                                                                                         |
| Jurassic            | USA            | Summerville Formation               | Restricted marine                                             | Sole marks, tool marks                                                                  | Present                                            |                                                                    | Blakey, 1989, in <i>Geologic Evolution of Arizona</i>                                                                                                                                                                                                                                                                                                                                                                        |
| Jurassic            | USA            | Sundance Formation                  | Storm-mediated mid-ramp                                       | Putative prod marks                                                                     | Present                                            |                                                                    | Michalak, 2013, Dartmouth College M.S. thesis                                                                                                                                                                                                                                                                                                                                                                                |
| Jurassic            | Morocco        | Tazigzaout Formation                | Offshore shelf                                                | Flute casts, furrows, striations, grooves                                               | Present                                            |                                                                    | Ait Addi, 2008, <i>Volumina Jurassica</i>                                                                                                                                                                                                                                                                                                                                                                                    |
| Jurassic            | United Kingdom | White Limestone                     | Tidal flat                                                    | Groove casts, prod marks, bounce casts                                                  | Common (prod marks, bounce casts)                  |                                                                    | Klein, 1965, <i>SEPM Special Publication</i>                                                                                                                                                                                                                                                                                                                                                                                 |
| Jurassic-Cretaceous | Tibet          | Gucuo Formation                     | Shelf, above SWB                                              | Flute casts                                                                             | Present                                            |                                                                    | Hu et al., 2008, <i>Cretaceous Research</i>                                                                                                                                                                                                                                                                                                                                                                                  |
| Jurassic-Cretaceous | Mozambique     | Pemba Formation                     | Marginal to shallow marine, fluviodeltaic, emergent           | Flute casts                                                                             | Present                                            |                                                                    | Key et al., 2008, <i>South African Journal of Geology</i>                                                                                                                                                                                                                                                                                                                                                                    |
| Cretaceous          | Argentina      | Agrio Formation                     | Storm-influenced mid-ramp                                     | Flute casts                                                                             | Rare to present                                    |                                                                    | Lazo et al., 2005, <i>Geological Society, London Special Publication</i>                                                                                                                                                                                                                                                                                                                                                     |
| Cretaceous          | Chile          | Apeleg Formation                    | Outer shelf, sub-WB                                           | Kullingia (scratch circles)                                                             | Present                                            |                                                                    | Jensen et al., 2002, <i>Lethaia</i>                                                                                                                                                                                                                                                                                                                                                                                          |
| Cretaceous          | Canada         | Bearpaw Formation                   | Shallow marine                                                | Gutter casts                                                                            | Present                                            |                                                                    | Hathway, 2016, <i>Bulletin of Canadian Petroleum Geology</i>                                                                                                                                                                                                                                                                                                                                                                 |
| Cretaceous          | Germany        | Bentheim Sandstone Formation        | Deltaic                                                       | Gutter casts, groove casts                                                              | Present                                            | Large gutter casts                                                 | Wonham et al., 1997, <i>GCSSEPM Special Publication</i>                                                                                                                                                                                                                                                                                                                                                                      |
| Cretaceous          | India          | Bhuj Formation                      | Storm-influenced outer shelf                                  | Groove casts                                                                            | Present                                            |                                                                    | Mandal et al., 2016, <i>Marine and Petroleum Geology</i>                                                                                                                                                                                                                                                                                                                                                                     |
| Cretaceous          | USA            | Blackhawk Formation                 | Shoreface to shelf, offshore transition zone, deltaic         | Flute casts, groove casts, prod marks, sole marks, gutter casts                         | Present                                            | Large gutter casts, up to 3 m wide, 1 m deep (commonly 50 cm deep) | Swift et al., 1987, <i>Sedimentology</i> ; Hampson, 2000, <i>Journal of Sedimentary Research</i> ; Taylor et al., 2002, <i>Journal of Sedimentary Research</i> ; Pattison, 2005, <i>GSA Field Guide</i> ; Pattison and Davies, 2007, <i>GSA Field Guide</i> ; Hampson et al., 2008, <i>SEPM Special Publication</i> ; Graham, 2014, Imperial College London PhD Dissertation; Eide et al., 2015, <i>Petroleum Geoscience</i> |
| Cretaceous          | Canada         | Blackstone Formation                | Inner shelf                                                   | Gutter casts                                                                            | Rare                                               |                                                                    | Leckie et al., 2000, <i>Geological Society of America Bulletin</i> ; Plint and Cheadle, 2015, <i>Sedimentology</i>                                                                                                                                                                                                                                                                                                           |
| Cretaceous          | Morocco        | Bouzerگون Formation                 | Shelf, sub-SWB                                                | Groove marks, tool marks                                                                | Present                                            |                                                                    | Nouidar and Chellai, 2002, <i>Sedimentary Geology</i>                                                                                                                                                                                                                                                                                                                                                                        |

Table DR1. Phanerozoic shallow marine sole marks

| Geologic Period | Geography | Geologic Unit                                                                | Paleoenvironment                                                                  | Sole Mark Type                                                                                          | Sole Mark Density                                               | Sole Mark Size                                      | Reference (Author, Year, Journal)                                                                                                                                                                                                                                                                                                                                                                                                                                                                                                                                                                                                    |
|-----------------|-----------|------------------------------------------------------------------------------|-----------------------------------------------------------------------------------|---------------------------------------------------------------------------------------------------------|-----------------------------------------------------------------|-----------------------------------------------------|--------------------------------------------------------------------------------------------------------------------------------------------------------------------------------------------------------------------------------------------------------------------------------------------------------------------------------------------------------------------------------------------------------------------------------------------------------------------------------------------------------------------------------------------------------------------------------------------------------------------------------------|
| Cretaceous      | USA       | Bridge Creek Limestone (Dakota Formation, Tropic Formation)                  | Storm-dominated shoreface                                                         | Gutter casts                                                                                            | Present                                                         |                                                     | Laurin and Sageman, 2007, <i>Journal of Sedimentary Research</i>                                                                                                                                                                                                                                                                                                                                                                                                                                                                                                                                                                     |
| Cretaceous      | Canada    | Cardium Formation                                                            | Shoreface transition zone to offshore                                             | Gutter casts, groove casts                                                                              | Present (groove casts) to abundant (gutter casts)               | "Large-scale" gutter casts                          | Deutsch, 1992, University of Calgary MSc thesis; Hart and Plint, 2003, <i>Bulletin of Canadian Petroleum Geology</i>                                                                                                                                                                                                                                                                                                                                                                                                                                                                                                                 |
| Cretaceous      | USA       | Cliff House Sandstone                                                        | Proximal lower shoreface to offshore, sub-SWB                                     | Gutter casts                                                                                            | Present to locally abundant                                     |                                                     | Jordan et al., 2016, <i>Journal of Sedimentary Research</i>                                                                                                                                                                                                                                                                                                                                                                                                                                                                                                                                                                          |
| Cretaceous      | USA       | Del Rio Formation                                                            | Storm-influenced shallow marine, brackish                                         | Prod, groove and tool marks, skip marks, gutter casts                                                   | Common                                                          |                                                     | Lock and Bases, 2008, <i>AAPG Annual Meeting</i> ; Lock et al., 2009, <i>Gulf Coast Association of Geological Societies Transactions</i>                                                                                                                                                                                                                                                                                                                                                                                                                                                                                             |
| Cretaceous      | USA       | Denton Formation                                                             | Shallow marine                                                                    | Tool marks (grooves)                                                                                    | Abundant                                                        |                                                     | Scott et al., 1975, <i>Journal of Sedimentary Petrology</i>                                                                                                                                                                                                                                                                                                                                                                                                                                                                                                                                                                          |
| Cretaceous      | Chile     | Dorotea Formation                                                            | Shelf, deltaic                                                                    | Sole marks, tool marks                                                                                  | Rare                                                            |                                                     | Covault et al., 2009, <i>Journal of Sedimentary Research</i>                                                                                                                                                                                                                                                                                                                                                                                                                                                                                                                                                                         |
| Cretaceous      | Canada    | Dunvegan Formation                                                           | Prodelta                                                                          | Gutter casts                                                                                            | Rare                                                            |                                                     | Plint and Nummedal, 2000, <i>Geological Society, London, Special Publication</i> ; Bhattacharya and MacEachern, 2009, <i>Journal of Sedimentary Research</i> ; Coates and MacEachern, 2009, <i>Applied Ichology</i> ; Hay and Plint, 2009, <i>Bulletin of Canadian Petroleum Geology</i> ; Plint et al., 2009, <i>Journal of Sedimentary Research</i> ; Plint, 2014, <i>Sedimentology</i> ; Plint and Cheadle, 2015, <i>Sedimentology</i>                                                                                                                                                                                            |
| Cretaceous      | USA       | Eagle Ford Formation                                                         | Storm-influenced shallow marine                                                   | Gutter casts                                                                                            | Present                                                         |                                                     | Bohacs et al., 2014, <i>Geology</i>                                                                                                                                                                                                                                                                                                                                                                                                                                                                                                                                                                                                  |
| Cretaceous      | USA       | Eagle Formation (Rock Springs Formation)                                     | Lower shoreface, inner shelf, deltaic                                             | Flute marks, groove marks, gutter casts                                                                 | Present (flutes marks, groove marks) to abundant (gutter casts) |                                                     | Fitzsimmons and Johnson, 2000, <i>Geological Society, London, Special Publication</i> ; Plink-Björklund, 2008, <i>SEPM Special Publication</i> ; Swift et al., 2008, <i>SEPM Special Publication</i>                                                                                                                                                                                                                                                                                                                                                                                                                                 |
| Cretaceous      | Spain     | Escucha Formation                                                            | Storm-influenced, above WB                                                        | Gutter casts, groove casts, bounce casts, flute casts, scour casts, sole casts                          | Common                                                          |                                                     | Rodríguez-López et al., 2007 <i>Sedimentary Geology</i>                                                                                                                                                                                                                                                                                                                                                                                                                                                                                                                                                                              |
| Cretaceous      | Spain     | Fardes Formation                                                             | Upper slope                                                                       | Sole marks                                                                                              | Present                                                         |                                                     | Reicherter et al., 1994, <i>Palaeogeography, Palaeoclimatology, Palaeoecology</i>                                                                                                                                                                                                                                                                                                                                                                                                                                                                                                                                                    |
| Cretaceous      | USA       | Fox Hills Sandstone                                                          | Delta front                                                                       | Gutter casts                                                                                            | Rare                                                            |                                                     | Carvajal and Steel, 2009, <i>Journal of Sedimentary Research</i>                                                                                                                                                                                                                                                                                                                                                                                                                                                                                                                                                                     |
| Cretaceous      | USA       | Frontier Formation                                                           | Prodelta, delta front, coastal plain                                              | Gutter casts, sole marks, tool marks                                                                    | Present                                                         | Gutter casts range from ~5 cm deep, to 1.5 m deep   | Gani and Bhattacharya, 2007, <i>Journal of Sedimentary Research</i> ; Hutsky and Fielding, 2017, <i>Sedimentology</i>                                                                                                                                                                                                                                                                                                                                                                                                                                                                                                                |
| Cretaceous      | Chile     | Fuentes Formation                                                            | Shelf                                                                             | Tool marks                                                                                              | Present                                                         |                                                     | Macdonald, 1986, <i>Revista Geológica de Chile</i>                                                                                                                                                                                                                                                                                                                                                                                                                                                                                                                                                                                   |
| Cretaceous      | USA       | Greenhorn Limestone                                                          | ~SWB                                                                              | Flute marks, tool marks                                                                                 | Common                                                          |                                                     | Sageman, 1996, <i>Geology</i>                                                                                                                                                                                                                                                                                                                                                                                                                                                                                                                                                                                                        |
| Cretaceous      | USA       | Haystack Mountains Formation                                                 | Lower shoreface, inner shelf                                                      | Flute casts, groove casts, gutter casts                                                                 | Rare                                                            | Gutters can be 30-80 cm thick                       | Mellere and Steel, 2000, <i>Geological Society, London, Special Publication</i>                                                                                                                                                                                                                                                                                                                                                                                                                                                                                                                                                      |
| Cretaceous      | Argentina | Huitrín Formation                                                            | Lower shoreface to offshore transition zone                                       | Gutter casts                                                                                            | Rare                                                            | Gutters up to 40 cm deep and 20 cm wide             | Veiga et al., 2005, <i>Geological Society, London, Special Publication</i>                                                                                                                                                                                                                                                                                                                                                                                                                                                                                                                                                           |
| Cretaceous      | Canada    | Kaskapau Formation                                                           | Shallow marine bypass zone                                                        | Gutter casts                                                                                            | Rare                                                            | Cm-scale gutter casts                               | Plint, 2000, <i>Bulletin of Canadian Petroleum Geology</i> ; Varban and Plint, 2005, <i>Bulletin of Canadian Petroleum Geology</i> ; Kreitner and Plint, 2006, <i>Bulletin of Canadian Petroleum Geology</i> ; Plint and Kreitner, 2007, <i>Geology</i> ; Plint et al., 2012, <i>Journal of Sedimentary Research</i>                                                                                                                                                                                                                                                                                                                 |
| Cretaceous      | USA       | Kiamchi Formation                                                            | Shallow marine                                                                    | Tool marks (grooves)                                                                                    | Abundant                                                        |                                                     | Scott et al., 1975, <i>Journal of Sedimentary Petrology</i>                                                                                                                                                                                                                                                                                                                                                                                                                                                                                                                                                                          |
| Cretaceous      | USA       | Mancos Shale (Castlegate Sandstone, Point Lookout Sandstone, Iles Formation) | Shoreface, foreshore, barrier island, inner shelf, deltaic, lagoonal (restricted) | Gutter casts, helical sole marks on gutter cast bases, tool marks, bounce marks, prod marks, drag marks | Present to rare                                                 | Large gutter casts (m-scale length, dm-scale depth) | Chan, 1992, <i>Journal of Sedimentary Petrology</i> ; Pattison, 2005, <i>Journal of Sedimentary Research</i> ; Bullimore et al., 2008, <i>SEPM Special Publication</i> ; Sixsmith et al., 2008, <i>AAPG Bulletin</i> ; York et al., 2011, <i>Journal of Sedimentary Research</i> ; Painter et al., 2013, <i>Journal of Sedimentary Research</i> ; Legler et al., 2014, <i>Journal of Sedimentary Research</i> ; Andresen, 2015, Colorado School of Mines M.S. thesis; Fielding, 2015, <i>Sedimentology</i> ; Gomez-Veroiza and Steel, 2017, <i>Interpretation</i> ; Korus and Fielding, 2017, <i>Journal of Sedimentary Research</i> |
| Cretaceous      | Canada    | Marshybank Formation                                                         | Shoreface to inner shelf                                                          | Gutter casts                                                                                            | Present to locally abundant                                     |                                                     | Plint and Nummedal, 2000, <i>Geological Society, London, Special Publication</i>                                                                                                                                                                                                                                                                                                                                                                                                                                                                                                                                                     |
| Cretaceous      | USA       | Masuk Formation                                                              | Lagoonal, estuarine, tidal, brackish                                              | Tool marks, gutter casts                                                                                | Present                                                         |                                                     | Corbett et al., 2011, <i>Journal of Sedimentary Research</i>                                                                                                                                                                                                                                                                                                                                                                                                                                                                                                                                                                         |
| Cretaceous      | Canada    | Missisauga Formation                                                         | Prodelta to delta front                                                           | Groove cast                                                                                             | Present                                                         |                                                     | Gould et al., 2010, <i>Sedimentology</i>                                                                                                                                                                                                                                                                                                                                                                                                                                                                                                                                                                                             |

Table DR1. Phanerozoic shallow marine sole marks

| Geologic Period | Geography   | Geologic Unit                                     | Paleoenvironment                           | Sole Mark Type                                                                                                                                  | Sole Mark Density                                                                                                    | Sole Mark Size                           | Reference (Author, Year, Journal)                                                                                                                                                               |
|-----------------|-------------|---------------------------------------------------|--------------------------------------------|-------------------------------------------------------------------------------------------------------------------------------------------------|----------------------------------------------------------------------------------------------------------------------|------------------------------------------|-------------------------------------------------------------------------------------------------------------------------------------------------------------------------------------------------|
| Cretaceous      | Argentina   | Mulichinco Formation                              | Shoreface, shelf, deltaic                  | Flute marks, gutter casts                                                                                                                       | Present (gutter casts) to common (flute marks)                                                                       |                                          | Schwarz and Howell, 2005, <i>Geological Society, London, Special Publication</i>                                                                                                                |
| Cretaceous      | Australia   | Mullaman Beds                                     | Shelf                                      | Tool marks, gutter casts                                                                                                                        | Rare (gutter casts) to present                                                                                       | Gutter casts up 0.8 m long, 40 cm wide   | Krassay, 1994, <i>Sedimentary Geology</i>                                                                                                                                                       |
| Cretaceous      | Oman        | Muti Formation                                    | Shelf, bank, shoal                         | Putative "tool mark-like structures"                                                                                                            | Present                                                                                                              |                                          | Phillips et al., 2012, <i>Lithosphere Dynamics and Sedimentary Basins: The Arabian Plate and Analogues</i>                                                                                      |
| Cretaceous      | France      | not specified (Urgonian)                          | Platform                                   | Sole marks (gutter casts)                                                                                                                       | Present                                                                                                              |                                          | Leonide et al., 2012, <i>Sedimentary Geology</i>                                                                                                                                                |
| Cretaceous      | Pakistan    | Pab Formation                                     | Storm-dominated mid- to outer shelf        | Groove marks, prod marks, flute casts                                                                                                           | locally common (flute casts)                                                                                         |                                          | Khan et al., 2002, <i>Journal of Petroleum Geology</i>                                                                                                                                          |
| Cretaceous      | USA         | Pawpaw Formation                                  | Shallow marine                             | Tool marks (grooves), flute casts                                                                                                               | Rare (flute casts) to abundant (tool marks)                                                                          |                                          | Scott et al., 1975, <i>Journal of Sedimentary Petrology</i>                                                                                                                                     |
| Cretaceous      | Canada      | Peace River Formation                             | Storm-influenced offshore shallow marine   | Gutter casts                                                                                                                                    | Present                                                                                                              | Gutter casts cm-scale                    | Buckley et al., 2016, <i>Sedimentology</i>                                                                                                                                                      |
| Cretaceous      | Brazil      | São Sebastião Formation                           | Deltaic, brackish                          | Sole marks (flute casts, groove casts)                                                                                                          | Present                                                                                                              |                                          | Murphy and Schlanger, 1962, <i>AAPG Bulletin</i>                                                                                                                                                |
| Cretaceous      | Canada      | Shaftesbury Formation                             | Shallow marine                             | Gutter casts                                                                                                                                    | Rare                                                                                                                 |                                          | Plint and Cheadle, 2015, <i>Sedimentology</i>                                                                                                                                                   |
| Cretaceous      | USA         | Skull Creek Formation                             | Storm-influenced shoreface to offshore     | Gutter casts                                                                                                                                    | Present                                                                                                              |                                          | Graham and Etheridge, 1995, <i>Mountain Geologist</i> ; Graham, 2000, <i>AAPG Bulletin</i> ; Sutton et al., 2004, <i>AAPG Bulletin</i> ; Masterson, 2015, Colorado State University M.S. Thesis |
| Cretaceous      | Germany     | Söhlde Formation                                  | Shelf                                      | Gutter casts                                                                                                                                    | Present                                                                                                              |                                          | Wiese, 2009, <i>SEPM Special Publication</i>                                                                                                                                                    |
| Cretaceous      | Canada      | Spirit River Formation                            | Shoreface, strandplain, emergent           | Flute casts                                                                                                                                     | Present                                                                                                              |                                          | Caddel and Moslow, 2004, <i>Bulletin of Canadian Petroleum Geology</i>                                                                                                                          |
| Cretaceous      | USA         | Star Point Formation                              | Deltaic                                    | Flute casts, tool marks                                                                                                                         | Present (flute casts) to common (tool marks)                                                                         |                                          | Olariu et al., 2010, <i>AAPG Bulletin</i> ; Kamola and Louni, 2011, <i>GSA Abstracts with Programs</i> ; Forzoni et al., 2015, <i>Journal of Sedimentary Research</i>                           |
| Cretaceous      | USA         | Tingmerkuk Sandstone                              | Outer shelf to upper slope, above SWB      | Groove casts                                                                                                                                    | Common                                                                                                               |                                          | Lepain et al., 1999, <i>Alaska Geological Society Science and Technology Conference</i>                                                                                                         |
| Cretaceous      | England     | Vectis Formation                                  | Lagoonal, emergent                         | Groove casts, tool marks, gutter casts                                                                                                          | Rare                                                                                                                 |                                          | Radley et al., 1998, <i>Cretaceous Research</i> ; Radley and Barker, 2000, <i>Geological Magazine</i> ; Sweetman, 2015, <i>SVPCA Field Guide</i>                                                |
| Cretaceous      | Canada      | Viking Formation                                  | Delta front                                | Gutter casts                                                                                                                                    | Present                                                                                                              |                                          | Dafae and Pemberton, 2009, in <i>Applied Ichnology</i>                                                                                                                                          |
| Cretaceous      | Canada, USA | Wapiabi Formation                                 | Storm-dominated shelf, between FWB and SWB | Gutter casts, sole marks, grooves, prod marks                                                                                                   | Common                                                                                                               | Gutter casts 5-10 cm wide, a few cm deep | Cheel, 1991, <i>Journal of Sedimentary Petrology</i> ; Grifi, 2012, The University of Western Ontario M.S. thesis                                                                               |
| Paleogene       | Norway      | Battfjellet Formation                             | Upper shoreface                            | Flute casts                                                                                                                                     | Present                                                                                                              |                                          | Müller and Spielhagen, 1990, <i>Palaeogeography, Palaeoclimatology, Palaeoecology</i>                                                                                                           |
| Paleogene       | Egypt       | Birket Qarun Formation                            | Shoreface                                  | Gutter casts                                                                                                                                    | Present                                                                                                              |                                          | Peters et al., 2009, <i>Palaos</i>                                                                                                                                                              |
| Paleogene       | Iran        | Karaj Formation                                   | Marginal shallow marine to sabkha          | Groove casts                                                                                                                                    | Present                                                                                                              |                                          | Taghipour and Mackizadeh, 2012, <i>Neues Jahrbuch für Geologie und Paläontologie-Abhandlungen</i>                                                                                               |
| Paleogene       | Colombia    | Lisama Formation                                  | Deltaic                                    | Flute casts                                                                                                                                     | Common                                                                                                               |                                          | Moreno et al., 2011, <i>Journal of South American Earth Sciences</i>                                                                                                                            |
| Paleogene       | Iran        | Marich Unit (Konashamir Sandstone)                | Shallow marine                             | Flute casts                                                                                                                                     | Present                                                                                                              |                                          | McCall, 2002, <i>Geological Society, London, Special Publication</i>                                                                                                                            |
| Paleogene       | Switzerland | Meletta Beds                                      | Shallow marine                             | Flute casts, groove casts                                                                                                                       | Present                                                                                                              |                                          | Kuhlemann et al., 1999, <i>Neues Jahrbuch für Geologie und Paläontologie-Abhandlungen</i>                                                                                                       |
| Paleogene       | India       | Miru Formation                                    | Deltaic                                    | Flute casts, gutter casts, tool marks, current crescents                                                                                        | Present                                                                                                              |                                          | Henderson et al., 2011, <i>Earth-Science Reviews</i>                                                                                                                                            |
| Paleogene       | Japan       | not specified (Kumage Group)                      | Deltaic                                    | Flute casts, groove casts, striation casts, gutter casts, furrow-and-ridge casts, prod casts, bounce casts, brush casts, crescentic scour casts | Rare (furrow-and-ridge, prods, bounces, brushes, crescentic scours) to common (flutes, grooves, striations, gutters) |                                          | Whitaker, 1982, <i>Proceedings of the Geologists' Association</i>                                                                                                                               |
| Paleogene       | Azerbaijan  | not specified (Neslin Suite)                      | Deltaic                                    | Flute marks, groove marks, prod marks                                                                                                           | Present to common                                                                                                    |                                          | Vincent et al., 2005, <i>Geological Society of America Bulletin</i>                                                                                                                             |
| Paleogene       | Azerbaijan  | not specified (Sishnavar Sub-suite, Maykop Suite) | Delta front                                | Groove marks, prod marks, flute marks                                                                                                           | Common (grooves and prods)                                                                                           |                                          | Vincent et al., 2005, <i>Geological Society of America Bulletin</i>                                                                                                                             |
| Paleogene       | Jamaica     | not specified (Wagwater Belt)                     | Shelf, platform                            | Flute casts, sole marks                                                                                                                         | Present                                                                                                              |                                          | Mann and Burke, 1984, <i>Geology</i>                                                                                                                                                            |



Table DR1. Phanerozoic shallow marine sole marks

| Geologic Period    | Geography      | Geologic Unit                                       | Paleoenvironment                                        | Sole Mark Type                                      | Sole Mark Density | Sole Mark Size                                                           | Reference (Author, Year, Journal)                                                                                                                                                      |
|--------------------|----------------|-----------------------------------------------------|---------------------------------------------------------|-----------------------------------------------------|-------------------|--------------------------------------------------------------------------|----------------------------------------------------------------------------------------------------------------------------------------------------------------------------------------|
| Paleogene          | Antarctica     | Polonez Cove Formation                              | Deltaic, glaciomarine                                   | Gutter casts                                        | Present           |                                                                          | Quaglio et al., 2014, <i>Antarctic Science</i>                                                                                                                                         |
| Paleogene          | Croatia        | Promina Beds                                        | Upper shoreface                                         | Gutter cast/channel                                 | Present           |                                                                          | Babić and Zupanić, 2012, <i>Geologia Croatica</i>                                                                                                                                      |
| Paleogene          | India          | Subathu Formation                                   | Shoreface to inner shelf, ramp                          | Gutter cast, flute marks, groove marks              | Present           |                                                                          | Singh and Srivastava, 2011, <i>Journal Geological Society of India</i> ; Bhatia et al., 2013, <i>Journal of the Palaeontological Society of India</i>                                  |
| Paleogene          | USA            | Tallahatta Formation                                | Middle shelf, offshore transition zone                  | Gutter casts                                        | Present           |                                                                          | Savrda et al., 2010, <i>Palaos</i>                                                                                                                                                     |
| Paleogene          | Turkey         | Unit 1                                              | Storm-influenced shallow marine                         | Flutes, grooves, sole marks, tool marks, prod marks | Common            |                                                                          | Gökçen and Kelling, 1985, <i>Geologische Rundschau</i>                                                                                                                                 |
| Paleogene          | United Kingdom | Wittering Formation                                 | Estuarine, lagoonal, brackish, emergent                 | Gutter casts                                        | Abundant          |                                                                          | Huggett et al., 2005, <i>Journal of Sedimentary Research</i>                                                                                                                           |
| Paleogene          | Turkey         | Yenice Formation                                    | Shallow marine                                          | Flute marks, groove marks                           | Present           |                                                                          | Gürbüz and Gül, 2005, <i>Turkish Journal of Earth Sciences</i>                                                                                                                         |
| Paleogene-Neogene  | India          | Lower Murree Formation                              | Estuarine, tidal flat, emergent                         | Flute casts, groove casts                           | Present           |                                                                          | Singh and Singh, 1995, in <i>Tidal Signatures in Modern and Ancient Environments</i>                                                                                                   |
| Neogene            | Austria        | Türkenschanze Formation                             | Marginal epeiric marine, brackish, lacustrine influence | Flute casts, groove casts                           | Present           |                                                                          | Glaessner, 1958, <i>The Journal of Geology</i>                                                                                                                                         |
| Neogene            | Iran           | Agha Jari Formation                                 | Estuarine- and fluvial-influenced tidal flat            | Flute casts                                         | Present           |                                                                          | Pirouz et al., 2016, <i>Geological Society of America Special Paper</i>                                                                                                                |
| Neogene            | Borneo         | Belait Formation (Miri Formation, Lambir Formation) | Storm-influenced shoreface to delta front               | Gutter casts (including pot casts)                  | Common            | Gutters 0.1-2 m thick, 0.15-10.8 m wide (average 0.34 m thick, 2 m wide) | Collins et al., 2017, <i>Sedimentology</i>                                                                                                                                             |
| Neogene            | Denmark        | Billund Sand                                        | Shoreface                                               | Gutter casts                                        | Present           |                                                                          | Hansen and Rasmussen, 2008, <i>Journal of Sedimentary Research</i>                                                                                                                     |
| Neogene            | Italy          | Botro dell'Acqua Bianca Clays                       | Lagoonal                                                | Flute casts, groove casts                           | Rare              |                                                                          | Cornamusi et al., 2011, <i>Italian Journal of Geosciences</i>                                                                                                                          |
| Neogene            | Australia      | Bryant Creek Formation                              | Nearshore, restricted, epeiric ramp                     | Pot casts, gutter casts                             | Present           |                                                                          | Lukasik and James, 2003, <i>Journal of Sedimentary Research</i> ; Lukasik and James, 2006, <i>Geology Society, London, Special Publication</i>                                         |
| Neogene            | Peru           | Camana Formation                                    | Delta front                                             | Sole marks (gutter casts)                           | Present           |                                                                          | Alván and von Eynatten, 2014, <i>Journal of South American Earth Sciences</i>                                                                                                          |
| Neogene            | Iran           | Darkhunish Shale Unit                               | Neritic to deeper shallow marine                        | Flute casts                                         | Present           |                                                                          | McCall, 2002, <i>Geological Society, London, Special Publication</i>                                                                                                                   |
| Neogene            | Austria        | Grund Formation                                     | Storm-dominated shelf, sublittoral                      | Groove marks                                        | Present           |                                                                          | Roetzel and Pervesler, 2004, <i>Geologica Carpathia</i> ; Zuschin et al., 2005, <i>Palaos</i>                                                                                          |
| Neogene            | Iran           | Jaghin Unit                                         | Deltaic, paralic or estuarine (restricted)              | Flute casts, prod marks                             | Present           |                                                                          | McCall, 2002, <i>Geological Society, London, Special Publication</i>                                                                                                                   |
| Neogene            | Japan          | Kawaguchi Formation                                 | Shelf, sub-SWB and deeper marine                        | Sole marks                                          | Present           |                                                                          | Tokuhashi, 1996, <i>Sedimentary Geology</i>                                                                                                                                            |
| Neogene            | Trinidad       | Mayaro Formation                                    | Deltaic                                                 | Gutter casts                                        | Present           | Gutter casts 2-50 cm deep, 10-20 cm wide, up to m scale                  | Bowman and Johnson, 2014, <i>Sedimentology</i> ; Bowman, 2016, <i>Geological Society, London, Special Publications</i> ; Dasgupta et al., 2016, <i>Journal of Sedimentary Research</i> |
| Neogene            | Iran           | Mishan Formation                                    | Lagoonal to sabkha/supratidal                           | Groove marks                                        | Present           |                                                                          | Pirouz et al., 2016, <i>Geological Society of America Special Paper</i>                                                                                                                |
| Neogene            | Turkey         | not specified ("upper unit", Ermenek platform)      | Shallow marine distal ramp                              | Gutter casts                                        | Present           |                                                                          | Quiquerez and Dromart, 2006, <i>Geological Magazine</i>                                                                                                                                |
| Neogene            | Italy          | not specified (Siena Basin)                         | Shoreface, deltaic                                      | (Putative) flute casts, groove casts, gutter casts  | Present           |                                                                          | Martini and Sandrelli, 2015, <i>Sedimentology</i>                                                                                                                                      |
| Neogene            | Iran           | Roksha Unit                                         | Inner to outer shelf, estuarine                         | Flute casts, groove casts, prod marks               | Present           |                                                                          | McCall, 2002, <i>Geological Society, London, Special Publication</i>                                                                                                                   |
| Neogene            | Iran           | Sabz Unit                                           | Neritic                                                 | Flute casts                                         | Present           |                                                                          | McCall, 2002, <i>Geological Society, London, Special Publication</i>                                                                                                                   |
| Neogene            | Borneo         | Sandaken Formation                                  | Storm-influenced middle shoreface                       | Gutter casts                                        | Present           | Gutter casts up to >5 m wide, m-scale depth                              | Noad, 2015, <i>GeoConvention 2015: New Horizons</i>                                                                                                                                    |
| Neogene            | Spain          | Sorbas Member (Sorbas Basin)                        | Lagoonal                                                | Prod casts, groove casts                            | Present           |                                                                          | Doyle et al., 2000, <i>Geological Magazine</i>                                                                                                                                         |
| Neogene            | Italy          | Unit II                                             | Deltaic                                                 | Sole marks                                          | Present           |                                                                          | Palladino, 2011, <i>Basin Research</i>                                                                                                                                                 |
| Neogene            | Malaysia       | Upper Cycle V                                       | Shallow marine                                          | Putative gutter casts (unfigured)                   | Present           |                                                                          | Rahman et al., 2014, <i>Marine and Petroleum Geology</i>                                                                                                                               |
| Neogene-Quaternary | Taiwan         | Liuchungchi Formation                               | Outer shelf to upper slope                              | Sole marks                                          | Present           |                                                                          | Hong, 1997, <i>Journal of Asian Earth Sciences</i>                                                                                                                                     |
| Quaternary         | USA            | Merced Formation                                    | Nearshore shallow marine                                | Gutter casts                                        | Common            | Gutter cast diameter cm- to dm-scale (average ~10 cm)                    | Chiocci and Clifton, 1991, <i>SEPM Special Publication</i>                                                                                                                             |
| Quaternary         | USA            | modern sediments                                    | Outer shelf to upper rise                               | Epirelief 'sole' marks, tool marks, undichnia       | Locally common    |                                                                          | Stanley, 1971, <i>Journal of Sedimentary Petrology</i>                                                                                                                                 |
| Quaternary         | Antarctica     | modern sediments                                    | Shelf and upper rise                                    | Epirelief iceberg gouges (tool marks)               | Rare              |                                                                          | Harris and O'Brien, 1996, <i>Geo-Marine Letters</i>                                                                                                                                    |
| Quaternary         | Australia      | modern sediments                                    | Backshore, estuary, water level <10 cm deep)            | Epirelief tool marks, scratch circles               | Present           |                                                                          | Jones, 2006, <i>Australian Journal of Earth Sciences</i>                                                                                                                               |

Table DR1. Phanerozoic shallow marine sole marks

| Geologic Period | Geography | Geologic Unit                                     | Paleoenvironment           | Sole Mark Type                     | Sole Mark Density | Sole Mark Size | Reference (Author, Year, Journal)                                   |
|-----------------|-----------|---------------------------------------------------|----------------------------|------------------------------------|-------------------|----------------|---------------------------------------------------------------------|
| Quaternary      | Abu Dhabi | modern sediments                                  | Intertidal                 | Epirelief gouges (flutes, grooves) | Abundant          |                | Friedman and Sanders, 1974, <i>Journal of Sedimentary Petrology</i> |
| Quaternary      | Italy     | not specified (Arente delta complex, Crati Basin) | Prodelta, offshore, sub-WB | Groove marks, tool marks           | Present           |                | Fabbriatore et al., 2014, <i>Italian Journal of Geosciences</i>     |

## REFERENCES

- Adler, L., and Röper, M., 2012, Description of a new potential fossil hydromedusa *Palaequorea rygoli* and revision of the fossil medusa *Hydrocraspedota mayri* from the Plattenkalks of the Franconian Alb, Southern Germany: Neues Jahrbuch für Geologie und Paläontologie-Abhandlungen, v. 264, no. 3, p. 249-262.
- Ahmad, S., and Kumar, S., 2014, Trace fossil assemblage from the Nagaur Group, western India: Journal of the Palaeontological Society of India, v. 59, no. 2, p. 231-246.
- Ahn, S. Y., and Babcock, L. E., 2012, Microorganism-mediated preservation of *Planolites*, a common trace fossil from the Harkless Formation, Cambrian of Nevada, USA: Sedimentary Geology, v. 263-264, p. 30-35.
- Ait Addi, A., 2008, Storm deposits: evidence of event sedimentation in the Bajocian of the Central High Atlas, Morocco: Volumina Jurassica, v. 6, p. 23-32.
- Alshahrani, S., 2013, Depositional environment, history, diagenesis, and petroleum geology of the Cleveland Shale Member, northeastern Ohio [M.S.: Bowling Green State University, 180 p.
- Alván, A., and von Eynatten, H., 2014, Sedimentary facies and stratigraphic architecture in coarse-grained deltas: Anatomy of the Cenozoic Camaná Formation, southern Peru (16°25'S to 17°15'S): Journal of South American Earth Sciences, v. 54, p. 82-108.
- Álvaro, J. J., Ahlberg, P., and Axheimer, N., 2010, Skeletal carbonate productivity and phosphogenesis at the lower-middle Cambrian transition of Scania, southern Sweden: Geological Magazine, v. 147, no. 1, p. 59-76.
- Álvaro, J. J., and van Vliet-Lanoë, B., 2009, Late Ordovician carbonate productivity and glaciomarine record under quiescent and active extensional tectonics in NE Spain, in Bassett, M. G., ed., Early Palaeozoic Peri-Gondwana Terranes: New Insights from Tectonics and Biogeography, Volume 325, p. 117-139.
- Álvaro, J. J., Van Vliet-Lanoë, B., Vennin, E., and Blanc-Valleron, M. M., 2003, Lower Cambrian paleosols from the Cantabrian Mountains (northern Spain): A comparison with Neogene-Quaternary estuarine analogues: Sedimentary Geology, v. 163, no. 1-2, p. 67-84.
- Álvaro, J. J., Vennin, E., Villas, E., Destombes, J., and Vizcaíno, D., 2007, Pre-Hirnantian (latest Ordovician) benthic community assemblages: Controls and replacements in a siliciclastic-dominated platform of the eastern Anti-Atlas, Morocco: Palaeogeography Palaeoclimatology Palaeoecology, v. 245, no. 1-2, p. 20-36.
- Andresen, M. A., 2015, Three-dimensional stratigraphic architecture and evolution of an ancient river-dominated delta, Iles Formation, Book Cliffs, Colorado [M.S.: Colorado School of Mines, 68 p.
- Andrews, P. B., and Laird, M. G., 1976, Sedimentology of a late Cambrian regressive sequence (Bowers Group), northern Victoria Land, Antarctica: Sedimentary Geology, v. 16, no. 1, p. 21-44.
- Aplin, A. C., and Macquaker, J. H. S., 2011, Mudstone diversity: origin and implications for source, seal, and reservoir properties in petroleum systems: AAPG Bulletin, v. 95, no. 12, p. 2031-2059.
- Arora, A., Banerjee, S., and Dutta, S., 2015, Black shale in late Jurassic Jhuran Formation of Kutch: Possible indicator of oceanic anoxic event?: Journal of the Geological Society of India, v. 85, no. 3, p. 265-278.

- Axheimer, N., Ahlberg, P., and Cederstrom, P., 2007, A new lower Cambrian eodiscoid trilobite fauna from Swedish Lapland and its implications for intercontinental correlation: *Geological Magazine*, v. 144, no. 6, p. 953-961.
- Babić, L., and Zupanić, J., 2012, Laterally variable development of a basin-wide transgressive unit of the North Dalmatian foreland basin (Eocene, Dinarides, Croatia): *Geologia Croatica*, v. 65, no. 1, p. 1-27.
- Bagati, T. N., Kumar, R., and Ghosh, S. K., 1991, Regressive transgressive sedimentation in the Ordovician sequence of the Spiti (Tethys) basin, Himachal-Pradesh, India: *Sedimentary Geology*, v. 73, no. 1-2, p. 171-184.
- Balseiro, D., Waisfeld, B. G., and Buatois, L. A., 2011, Unusual trilobite biofacies from the Lower Ordovician of the Argentine Cordillera Oriental: new insights into olenid palaeoecology: *Lethaia*, v. 44, no. 1, p. 58-75.
- Basilici, G., de Luca, P. H. V., and Poiré, D. G., 2012, Hummocky cross-stratification-like structures and combined-flow ripples in the Punta Negra Formation (Lower-Middle Devonian, Argentine Precordillera): A turbiditic deep-water or storm-dominated prodelta inner-shelf system?: *Sedimentary Geology*, v. 267, p. 73-92.
- Baucon, A., and Neto de Carvalho, C., 2016, Stars of the aftermath: *Asteriacites* beds from the Lower Triassic of the Carnic Alps (Werfen Formation, Sauris di Sopra), Italy: *Palaios*, v. 31, no. 4, p. 161-176.
- Bayet-Goll, A., Chen, J., Moussavi-Harami, R., and Mahboubi, A., 2015, Depositional processes of ribbon carbonates in Middle Cambrian of Iran (Deh-Sufiyan Formation, Central Alborz): *Facies*, v. 61, no. 9, p. 1-18.
- Benton, M. J., and Gray, D. I., 1981, Lower Silurian distal shelf storm-induced turbidites in the Welsh Borders: sediments, tool marks and trace fossils: *Journal of the Geological Society*, v. 138, no. Nov, p. 675-694.
- Bhatia, S. B., Bhargava, O. N., Singh, B. P., and Bagi, H., 2013, Sequence stratigraphic framework of the Paleogene succession of the Himalayan Foreland Basin: a case study from the Shimla Hills: *Journal of the Palaeontological Society of India*, v. 58, no. 1, p. 21-38.
- Bhattacharya, H. N., and Bhattacharya, B., 2011, Sole marks in storm beds from a glacially influenced Late Palaeozoic shallow sea, Talchir Formation, Talchir Basin, India: *Indian Journal of Geosciences*, v. 65, no. 3, p. 175-188.
- , 2015, Lithofacies architecture and palaeogeography of the Late Paleozoic glaciomarine Talchir Formation, Raniganj Basin, India: *Journal of Palaeogeography*, v. 4, no. 3, p. 269-283.
- Bhattacharya, H. N., Bhattacharya, B., and Chakraborty, A., 2007, Crustacean burrow fills as obstacles for current crescents in Permo-Carboniferous Talchir formation, Raniganj Basin, Eastern India: *Journal of the Geological Society of India*, v. 69, no. 6, p. 1267-1270.
- Bhattacharya, H. N., Bhattacharya, B., Chakraborty, I., and Chakraborty, A., 2004, Sole marks in storm event beds in the Permo-Carboniferous Talchir Formation, Raniganj Basin, India: *Sedimentary Geology*, v. 166, no. 3-4, p. 209-222.
- Bhattacharya, J. P., and MacEachern, J. A., 2009, Hyperpycnal rivers and prodeltaic shelves in the Cretaceous Seaway of North America: *Journal of Sedimentary Research*, v. 79, no. 3-4, p. 184-209.

- Blakey, R. C., 1989, Triassic and Jurassic geology of the southern Colorado Plateau, *in* Jenney, J. P., and Reynolds, S. J., eds., *Geologic Evolution of Arizona*: Tuscon, Arizona Geological Society, p. 369-396.
- Blatt, H., and Jones, R. L., 1975, Proportions of exposed igneous, metamorphic, and sedimentary rocks: *Geological Society of America Bulletin*, v. 86, no. 8, p. 1085-1088.
- Blignault, H. J., and Theron, J. N., 2012, Modes of sedimentation and glaciological aspects of the Permo-Carboniferous Dwyka Group in the Elandsvlei-Elandsdrif area, South Africa: *South African Journal of Geology*, v. 115, no. 2, p. 211-224.
- Bohacs, K. M., Lazar, O. R., and Demko, T. M., 2014, Parasequence types in shelfal mudstone strata-quantitative observations of lithofacies and stacking patterns, and conceptual link to modern depositional regimes: *Geology*, v. 42, no. 2, p. 131-134.
- Borkhataria, R., Aigner, T., and Pipping, K. J. C. P., 2006, An unusual, muddy, epeiric carbonate reservoir: the Lower Muschelkalk (Middle Triassic) of the Netherlands: *AAPG Bulletin*, v. 90, no. 1, p. 61-89.
- Bourque, P.-A., Malo, M., and Kirkwood, D., 2001, Stratigraphy, tectono-sedimentary evolution and paleogeography of the post-Taconian-pre-Carboniferous Gaspé Belt: an overview: *Bulletin of Canadian Petroleum Geology*, v. 49, no. 2, p. 186-201.
- Bowman, A., 2016, Outcrop analogues for hydrocarbon reservoirs in the Columbus Basin, offshore east Trinidad, *in* Bowman, M., Smyth, H. R., Good, T. R., Passey, S. R., Hirst, J. P. P., and Jordan, C. J., eds., *The Value of Outcrop Studies in Reducing Subsurface Uncertainty and Risk in Hydrocarbon Exploration and Production*, The Geological Society of London, p. 151-192.
- Bowman, A. P., and Johnson, H. D., 2014, Storm-dominated shelf-edge delta successions in a high accommodation setting: The palaeo-Orinoco Delta (Mayaro Formation), Columbus Basin, South-East Trinidad: *Sedimentology*, v. 61, no. 3, p. 792-835.
- Brandt, D. S., Meyer, D. L., and Lask, P. B., 1995, *Isotelus* (Trilobita) "hunting burrow" from Upper Ordovician strata, Ohio: *Journal of Paleontology*, v. 69, no. 6, p. 1079-1083.
- Brennan, P. R., Brett, C. E., Bartholomew, A. J., and Allmon, W. D., 2005, Recurrent faunas revisited: the Upper Devonian Ithaca Shale *Tropidoleptus* faunas of central New York: *Geological Society of America Abstracts with Programs: 2005 Salt Lake City Annual Meeting*, v. 37, no. 7, p. 367.
- Brett, C. E., Allison, P. A., Tsujita, C. J., Soldani, D., and Moffat, H. A., 2006, Sedimentology, taphonomy, and paleoecology of meter-scale cycles from the Upper Ordovician of Ontario: *Palaos*, v. 21, no. 6, p. 530-547.
- Brett, C. E., Schramm, T. J., Dattilo, B. F., and Marshall, N. T., 2012, Upper Ordovician strata of southern Ohio-Indiana: Shales, shell beds, storms, sediment starvation, and cycles: *Geological Society of America North-Central Section Meeting Fieldtrip 405*.
- Bridge, J. S., and Willis, B. J., 1994, Marine transgressions and regressions recorded in Middle Devonian shore-zone deposits of the Catskill clastic wedge: *Geological Society of America Bulletin*, v. 106, no. 11, p. 1440-1458.
- Bridges, P. H., 1972, Significance of toolmarks on a Silurian erosional furrow: *Geological Magazine*, v. 109, no. 5, p. 405-410.
- Browning, C., and Penn-Clarke, C. R., 2016, Lithostratigraphy of the Floriskraal Formation (Witteberg Group), South Africa: *South African Journal of Geology*, v. 119, no. 2, p. 425-434.

- Browning, C., and Reid, M., 2017, Lithostratigraphy of the Kweekvlei Formation (Witteberg Group), Cape Supergroup: South African Journal of Geology, v. 120, no. 3, p. 421-432.
- Buatois, L. A., Almond, J., and Germs, G. J. B., 2013, Environmental tolerance and range offset of *Treptichnus pedum*: Implications for the recognition of the Ediacaran-Cambrian boundary: Geology, v. 41, no. 4, p. 519-522.
- Buatois, L. A., and Mangano, M. G., 2003, Sedimentary facies, depositional evolution of the Upper Cambrian-Lower Ordovician Santa Rosita formation in northwest Argentina: Journal of South American Earth Sciences, v. 16, no. 5, p. 343-363.
- , 2012, An early Cambrian shallow-marine ichnofauna from the Puncoviscana Formation of northwest Argentina: The interplay between sophisticated feeding behaviors, matgrounds and sea-level changes: Journal of Paleontology, v. 86, no. 1, p. 7-18.
- Buatois, L. A., Mangano, M. G., Maples, C. G., and Lanier, W. P., 1997, The paradox of nonmarine ichnofaunas in tidal rhythmites: Integrating sedimentologic and ichnologic data from the Late Carboniferous of eastern Kansas, USA: Palaios, v. 12, no. 5, p. 467-481.
- , 1998a, Ichnology of an Upper Carboniferous fluvio-estuarine paleovalley: The Tonganoxie Sandstone, Buildex Quarry, eastern Kansas, USA: Journal of Paleontology, v. 72, no. 1, p. 152-180.
- Buatois, L. A., Mángano, M. G., Maples, C. G., and Lanier, W. P., 1998b, Allostratigraphic and sedimentologic applications of trace fossils to the study of incised estuarine valleys: An example from the Virgilian Tonganoxie Sandstone Member of eastern Kansas: Current Research in Earth Sciences, v. 241, p. 1-27.
- Buckley, R. A., Plint, A. G., Henderson, O. A., Krawetz, J. R., and Vannelli, K. M., 2016, Ramp sedimentation across a middle Albian, Arctic embayment: Influence of subsidence, eustasy and sediment supply on stratal architecture and facies distribution, Lower Cretaceous, Western Canada Foreland Basin: Sedimentology, v. 63, no. 3, p. 699-742.
- Bullimore, S. A., Helland-Hansen, W., Henriksen, S., and Steel, R. J., 2008, Shoreline trajectory and its impact on coastal depositional environments: an example from the Upper Cretaceous Mesaverde Group, northwestern Colorado, U.S.A., in Hampson, G. J., Steel, R. J., Burgess, P. M., and Dalrymple, R. W., eds., Recent Advances in Models of Siliciclastic Shallow-Marine Stratigraphy: Tulsa, Oklahoma, SEPM, p. 209-236.
- Caddel, E. M., and Moslow, T. F., 2004, Outcrop sedimentology and stratal architecture of the Lower Albian Falher C sub-Member, Spirit River Formation, Bullmoose Mountain, northeastern British Columbia: Bulletin of Canadian Petroleum Geology, v. 52, no. 1, p. 4-22.
- Calner, M., and Eriksson, M. E., 2012, The record of microbially induced sedimentary structures (MISS) in the Swedish Paleozoic: Microbial Mats in Siliciclastic Depositional Systems through Time, no. 101, p. 29-35.
- Carr, D. L., and Scott, A. J., 1990, Late Pennsylvanian storm-dominated shelf sand ridges, Sacramento Mountains, New Mexico: Journal of Sedimentary Petrology, v. 60, no. 4, p. 592-607.
- Carrera, M. G., Montoya, E., Rustán, J. J., and Halpern, K., 2013, Silurian-Devonian coral associations across a sequence stratigraphic boundary in the Argentine Precordillera: Geological Journal, v. 48, no. 2-3, p. 256-269.
- Carroll, A. R., Graham, S. A., Hendrix, M. S., Ying, D., and Zhou, D., 1995, Late Paleozoic tectonic amalgamation of northwestern China: Sedimentary record of the northern Tarim,

- northwestern Turpan, and southern Junggar Basins: Geological Society of America Bulletin, v. 107, no. 5, p. 571-594.
- Carvajal, C., and Steel, R., 2009, Shelf-edge architecture and bypass of sand to deep water: influence of shelf-edge processes, sea level, and sediment supply: Journal of Sedimentary Research, v. 79, no. 9-10, p. 652-672.
- Castillo, P., Fanning, C. M., Fernandez, R., Poblete, F., and Hervé, F., 2017, Provenance and age constraints of Paleozoic siliciclastic rocks from the Ellsworth Mountains in West Antarctica, as determined by detrital zircon geochronology: Geological Society of America Bulletin, v. 129, no. 11-12, p. 1568-1584.
- Chan, M. A., 1992, Oolitic ironstone of the Cretaceous Western Interior Seaway, east-central Utah: Journal of Sedimentary Petrology, v. 62, no. 4, p. 693-705.
- Cheel, R. J., 1991, Grain fabric in hummocky cross-stratified storm beds: genetic implications: Journal of Sedimentary Petrology, v. 61, no. 1, p. 102-110.
- Chen, J., 2014, Surface and subsurface reworking by storms on a Cambrian carbonate platform: evidence from limestone breccias and conglomerates: Geologos, v. 20, no. 1, p. 13-23.
- Chen, J. T., and Lee, H. S., 2013, Soft-sediment deformation structures in Cambrian siliciclastic and carbonate storm deposits (Shandong Province, China): Differential liquefaction and fluidization triggered by storm-wave loading: Sedimentary Geology, v. 288, p. 81-94.
- Chen, Z.-Q., Fraiser, M. L., and Bolton, C., 2012, Early Triassic trace fossils from Gondwana Interior Sea: Implication for ecosystem recovery following the end-Permian mass extinction in south high-latitude region: Gondwana Research, v. 22, no. 1, p. 238-255.
- Chiocci, F. L., and Clifton, H. E., 1991, Gravel-filled gutter casts in nearshore facies—indicators of ancient shoreline trend, *in* Osborne, R. H., ed., From Shoreline to Abyss: Contributions in Marine Geology in Honor of Francis Parker Shepard: Tulsa, Oklahoma, SEPM, p. 67-76.
- Chisholm, J. I., and Waters, C. N., 2012, Syn-sedimentary deformation of the Ashover Grit (Pennsylvanian, Namurian, Marsdenian Substage) deltaic succession around Wirksworth, Derbyshire, UK: Proceedings of the Yorkshire Geological Society, v. 59, no. 1, p. 25-36.
- Chough, S. K., Jo, H. R., Ryang, W. H., and Cant, D. J., 1998, The Fernie-Kootenay transition, Banff National Park, Canada: depositional characteristics of density-induced and combined flows: Geoscience Journal, v. 2, no. 4, p. 184-205.
- Chowns, T. M., and Rindsberg, A. K., 2015, Stratigraphy and depositional environments in the Silurian Red Mountain Formation of the southern Appalachian basin, USA, *in* Holmes, A. E., ed., Diverse Excursions in the Southeast: Paleozoic to Present, The Geological Society of America, p. 95-143.
- Clayer, F., 2012, Sediment dynamics and stratigraphic architecture of a Lower Silurian storm-dominated carbonate ramp, Anticosti Island, Québec, Canada [M.Sc.: University of Ottawa, 85 p.
- Clayer, F., and Desrochers, A., 2014, The stratigraphic imprint of a mid-Telychian (Llandovery, Early Silurian) glaciation on far-field shallow-water carbonates, Anticosti Island, Eastern Canada: Estonian Journal of Earth Sciences, v. 63, no. 4, p. 207-213.
- Close, R. A., Benson, R. B. J., Upchurch, P., and Butler, R. J., 2017, Controlling for the species-area effect supports constrained long-term Mesozoic terrestrial vertebrate diversification: Nature Communications, v. 8.
- Coates, L., and MacEachern, J. A., 2009, The ichnological signatures of river- and wave-dominated delta complexes: differentiating deltaic and non-deltaic shallow marine



- successions, Lower Cretaceous Viking Formation and Upper Cretaceous Dunvegan Formation, west-central Alberta, *in* MacEachern, J. A., Bann, K. L., Gingras, M. K., and Pemberton, S. G., eds., *Applied Ichnology*, SEPM, p. 227-254.
- Collins, D. S., Johnson, H. D., Allison, P. A., Guilpain, P., and Damit, A. R., 2017, Coupled 'storm-flood' depositional model: Application to the Miocene-Modern Baram Delta Province, north-west Borneo: *Sedimentology*, v. 64, no. 5, p. 1203-1235.
- Colquhoun, G. P., 1995, Siliciclastic sedimentation on a storm- and tide-influenced shelf and shoreline: the Early Devonian Roxburgh Formation, NE Lachlan Fold Belt, southeastern Australia: *Sedimentary Geology*, v. 97, no. 1-2, p. 69-98.
- Compton, R. R., 1960, Contact Metamorphism in Santa Rosa Range, Nevada: *Geological Society of America Bulletin*, v. 71, no. 9, p. 1383-1416.
- Copeland, K., and Straffin, E. C., 2011, Depositional environment of the Northeast Shale Member along Four Mile Creek, Erie County, Pennsylvania: *Geological Society of America Abstracts with Programs*, Northeastern (46th Annual) and North-Central (45th Annual) Joint Meeting, v. 43, no. 1, p. 115.
- Corbett, M. J., Fielding, C. R., and Birgenheier, L. P., 2011, Stratigraphy of a Cretaceous coastal-plain fluvial succession: The Campanian Masuk Formation, Henry Mountains Syncline, Utah, U.S.A.: *Journal of Sedimentary Research*, v. 81, no. 1-2, p. 80-96.
- Cornamusini, G., Foresi, L. M., Massa, G., Bonciani, F., Callegari, I., Da Prato, S., and Ielpi, A., 2011, The Miocene successions of the Fiora Hills: considerations about the development of the minor basins of Southern Tuscany: *Italian Journal of Geosciences*, v. 130, no. 3, p. 404-424.
- Couto, H., Knight, J., and Lourenco, A., 2013, Late Ordovician ice-marginal processes and sea-level change from the north Gondwana platform: evidence from the Valongo Anticline (northern Portugal): *Palaeogeography, Palaeoclimatology, Palaeoecology*, v. 375, p. 1-15.
- Covault, J. A., Romans, B. W., and Graham, S. A., 2009, Outcrop expression of a continental-margin-scale shelf-edge delta from the Cretaceous Magallanes Basin, Chile: *Journal of Sedimentary Research*, v. 79, no. 7-8, p. 523-539.
- Craft, J. H., and Bridge, J. S., 1987, Shallow-marine sedimentary processes in the Late Devonian Catskill Sea, New York State: *Geological Society of America Bulletin*, v. 98, no. 3, p. 338-355.
- Crimes, T. P., 1970, A facies analysis of the Cambrian of Wales: *Palaeogeography, Palaeoclimatology, Palaeoecology*, v. 7, no. 2, p. 113-170.
- Cudzil, M. R., and Driese, S. G., 1987, Fluvial, tidal and storm sedimentation in the Chilhowee Group (Lower Cambrian), northeastern Tennessee, USA: *Sedimentology*, v. 34, no. 5, p. 861-883.
- Cummins, W. A., 1961, Some sedimentary structures from the Lower Keuper Sandstones: *Geological Journal*, v. 2, no. 1, p. 37-43.
- Curtis, M. L. K., 1968, The Tremadoc rocks of the Tortworth Inlier, Gloucestershire: *Proceedings of the Geologists' Association*, v. 79, no. 3, p. 349-362.
- Dafoe, L. T., and Pemberton, S. G., 2009, Ichnological assemblages of wave-influenced and mixed river- and wave influenced deltaic deposits in the Viking Formation, Alberta, Canada, *in* MacEachern, J. A., Bann, K. L., Gingras, M. K., and Pemberton, S. G., eds., *Applied Ichnology*, SEPM, p. 291-306.



- Dahlqvist, P., 2004, Late Ordovician (Hirnantian) depositional pattern and sea-level change in shallow marine to shoreface cycles in central Sweden: *Geological Magazine*, v. 141, no. 5, p. 605-616.
- Dam, G., and Andreasen, F., 1990, High-energy ephemeral stream deltas; an example from the Upper Silurian Holmestrand Formation of the Oslo Region, Norway: *Sedimentary Geology*, v. 66, no. 3-4, p. 197-225.
- Dasgupta, S., Buatois, L. A., and Mángano, M. G., 2016, Living on the edge: evaluating the impact of stress factors on animal-sediment interactions in subenvironments of a shelf-margin delta, the Mayaro Formation, Trinidad: *Journal of Sedimentary Research*, v. 86, no. 9, p. 1034-1066.
- Dattilo, B. F., Brett, C. E., Tsujita, C. J., and Fairhurst, R., 2008, Sediment supply versus storm winnowing in the development of muddy and shelly interbeds from the Upper Ordovician of the Cincinnati region, USA: *Canadian Journal of Earth Sciences*, v. 45, no. 2, p. 243-265.
- Demko, T. M., and Gastaldo, R. A., 1996, Eustatic and autocyclic influences on deposition of the lower Pennsylvanian Mary Lee coal zone, Warrior Basin, Alabama: *International Journal of Coal Geology*, v. 31, no. 1-4, p. 3-19.
- Demoulin, J. A., and Harris, A. G., 2012, Cambrian – Ordovician sedimentary rocks of Alaska, *in* Derby, J. R., Fritz, R. D., Longacre, S. A., Morgan, W. A., and Sternbach, C. A., eds., *The great American carbonate bank: The geology and economic resources of the Cambrian – Ordovician Sauk megasequence of Laurentia*, The American Association of Petroleum Geologists, p. 649-673.
- Desjardins, P. R., Pratt, B. R., Buatois, L. A., and Mangano, M. G., 2010, Stratigraphy and sedimentary environments of the Lower Cambrian Gog Group in the southern Rocky Mountains of Western Canada: Transgressive sandstones on a broad continental margin: *Bulletin of Canadian Petroleum Geology*, v. 58, no. 4, p. 403-439.
- Deutsch, K. B., 1992, Sedimentology and stratigraphy of the Cretaceous Cardium Formation, Kakwa region, west-central Alberta [MSc: University of Calgary, 300 p.
- Dixon, R. J., 1987, Scharckreise from the Triassic Pont de Suert Formation, central Pyrenees, Spain: *Proceedings of the Geologists' Association*, v. 98, no. 3, p. 265-268.
- Doyle, P., Wood, J. L., and George, G. T., 2000, The shorebird ichnofacies: an example from the Miocene of southern Spain: *Geological Magazine*, v. 137, no. 5, p. 517-536.
- Droser, M. L., Jensen, S., and Gehling, J. G., 2002, Trace fossils and substrates of the terminal Proterozoic-Cambrian transition: Implications for the record of early bilaterians and sediment mixing: *Proceedings of the National Academy of Sciences of the United States of America*, v. 99, no. 20, p. 12572-12576.
- Droser, M. L., Jensen, S., and Gehling, J. G., 2004, Development of early Palaeozoic ichnofabrics: evidence from shallow marine siliciclastics, *in* McIlroy, D., ed., *The Application of Ichnology to Palaeoenvironmental and Stratigraphic Analysis*, Volume 228, p. 383-396.
- Durrani, R. A. M., Kassi, A. M., and Kasi, A. K., 2012, Petrology and provenance of the sandstone channel succession within the Jurassic Loralai Formation, Sulaiman Fold-Thrust Belt, Pakistan: *Journal of Himalayan Earth Sciences*, v. 45, no. 1, p. 1-16.
- Dyson, I. A., 1996, Significance of hummocky cross-stratification and quasi-planar lamination in the Lower Devonian Walhalla Group at Cape Liptrap, Victoria: *Australian Journal of Earth Sciences*, v. 43, no. 2, p. 189-199.

- Eide, C. H., Howell, J. A., and Buckley, S. J., 2015, Sedimentology and reservoir properties of tabular and erosive offshore transition deposits in wave-dominated, shallow-marine strata: Book Cliffs, USA: Petroleum Geoscience, v. 21, no. 1, p. 55-73.
- Evans, K. R., 2012, Gamma-ray cross sections—correlation of Steptoean strata in the eastern Great Basin using outcrop gamma-ray profiles, *in* Derby, J. R., Fritz, R. D., Longacre, S. A., Morgan, W. A., and Sternbach, C. A., eds., The great American carbonate bank: The geology and economic resources of the Cambrian – Ordovician Sauk megasequence of Laurentia, The American Association of Petroleum Geologists, p. 855 – 863.
- Fabbricatore, D., Robustelli, G., and Muto, F., 2014, Facies analysis and depositional architecture of shelf-type deltas in the Crati Basin (Calabrian Arc, south Italy): Italian Journal of Geosciences, v. 133, no. 1, p. 131-148.
- Falcon-Lang, H. J., 2004, Early Mississippian lycopsid forests in a delta-plain setting at Norton, near Sussex, New Brunswick, Canada: Journal of the Geological Society, London, v. 161, p. 969-981.
- , 2005, Small cordaitalean trees in a marine-influenced coastal habitat in the Pennsylvanian Joggins Formation, Nova Scotia: Journal of the Geological Society, London, v. 162, p. 485-500.
- Fielding, C. R., 2015, Anatomy of falling-stage deltas in the Turonian Ferron Sandstone of the western Henry Mountains Syncline, Utah: Growth faults, slope failures and mass transport complexes: Sedimentology, v. 62, no. 1, p. 1-26.
- Fielding, C. R., and Frank, T. D., 2015, Onset of the glacioeustatic signal recording late Palaeozoic Gondwanan ice growth: New data from palaeotropical East Fife, Scotland: Palaeogeography Palaeoclimatology Palaeoecology, v. 426, p. 121-138.
- Fitzsimmons, R., and Johnson, S., 2000, Forced regressions: recognition, architecture and genesis in the Campanian of the Bighorn Basin, Wyoming, *in* Hunt, D., and Gawthorpe, R. L., eds., Sedimentary Responses to Forced Regressions: London, The Geological Society of London, p. 113-139.
- Forzoni, A., Hampson, G., and Storms, J., 2015, Along-strike variations in stratigraphic architecture of shallow-marine reservoir analogues: Upper Cretaceous Panther Tongue delta and coeval shoreface, Star Point Sandstone, Wasatch Plateau, central Utah, U.S.A.: Journal of Sedimentary Research, v. 85, no. 8, p. 968-989.
- Friedman, G. M., and Sanders, J. E., 1974, Positive-relief bedforms on modern tidal flat that resemble molds of flutes and grooves; implications for geopetal criteria and for origin and classification of bedforms: Journal of Sedimentary Petrology, v. 44, no. 1, p. 181-189.
- Fürsich, F. T., Brunet, M.-F., Auxière, J.-L., and Munsch, H., 2017, Lower–Middle Jurassic facies patterns in the NW Afghan–Tajik Basin of southern Uzbekistan and their geodynamic context, *in* Brunet, M.-F., McCann, T., and Sobel, E. R., eds., Geological Evolution of Central Asian Basins and the Western Tien Shan Range: London, The Geological Society of London, p. 357–409.
- Fürsich, F. T., Callomon, J. H., Pandey, D. K., and Jaitly, A. K., 2004, Environments and faunal patterns in the Kachchh Rift Basin, Western India, during the Jurassic: Rivista Italiana di Paleontologia e Stratigrafia, v. 110, no. 1, p. 181-190.
- Fürsich, F. T., and Oschmann, W., 1993, Shell beds as tools in basin analysis: the Jurassic of Kachchh, western India: Journal of the Geological Society, London, v. 150, p. 169-185.

- Fürsich, F. T., Taheri, J., and Wilmsen, M., 2007, New occurrences of the trace fossil *Paleodictyon* in shallow marine environments: examples from the Triassic-Jurassic of Iran: *Palaios*, v. 22, no. 4, p. 408-416.
- Gani, M. R., and Bhattacharya, J. P., 2007, Basic building blocks and process variability of a Cretaceous delta: internal facies architecture reveals a more dynamic interaction of river, wave, and tidal processes than is indicated by external shape: *Journal of Sedimentary Research*, v. 77, no. 3-4, p. 284-302.
- Garten, A., 2012, A shallow marine storm-dominated shelf: Sælabonn Formation, Oslo Region (Lower Silurian): The transition from an epicontinental sea to the Caledonian foreland basin in the Oslo Region [M.S.: University of Oslo, 103 p.
- Gehrels, G. E., Johnsson, M. J., and Howell, D. G., 1999, Detrital zircon geochronology of the Adams Argillite and Nation River Formation, east-central Alaska, USA: *Journal of Sedimentary Research*, v. 69, no. 1, p. 135-144.
- Ghadeer, S. G., and Macquaker, J. H. S., 2011, Sediment transport processes in an ancient mud-dominated succession: a comparison of processes operating in marine offshore settings and anoxic basinal environments: *Journal of the Geological Society, London*, v. 168, no. 5, p. 1121-1132.
- Gindre, L., Le Heron, D., and Bjørnseth, H. M., 2012, High resolution facies analysis and sequence stratigraphy of the Siluro-Devonian succession of Al Kufrah basin (SE Libya): *Journal of African Earth Sciences*, v. 76, p. 8-26.
- Girard, F., Ghienne, J. F., and Rubino, J. L., 2012, Occurrence of hyperpycnal flows and hybrid event beds related to glacial outburst events in a Late Ordovician proglacial delta (Murzuq Basin, SW Libya): *Journal of Sedimentary Research*, v. 82, no. 9-10, p. 688-708.
- Glaessner, M. F., 1958, Sedimentary flow structures on bedding planes: *The Journal of Geology*, v. 66, no. 1, p. 1-7.
- Gökçen, S. L., and Kelling, G., 1985, Oligocene deposits of the Zara-Hafik region (Sivas, Central Turkey): evolution from storm-influenced shelf to evaporitic basin: *Geologische Rundschau*, v. 74, no. 1, p. 139-153.
- Gomez-Veroiza, C. A., and Steel, R. J., 2017, Source to sink sandstone-mudstone proportion and facies distribution across a third-order clastic wedge, Cretaceous Western Interior Seaway: *Interpretation*, v. 5, no. 4, p. ST11-ST34.
- Gomez, F. J., Ogle, N., Astin, R. A., and Kalin, R. M., 2007, Paleoenvironmental and carbon-oxygen isotope record of middle Cambrian carbonates (La Laja Formation) in the Argentine Precordillera: *Journal of Sedimentary Research*, v. 77, no. 9-10, p. 826-842.
- Gonzalez-Bonorino, G., and Middleton, G. V., 1976, A Devonian submarine fan in western Argentina: *Journal of Sedimentary Petrology*, v. 46, no. 1, p. 56-69.
- Goode, J. W., Williams, I. S., and Myrow, P., 2004, Provenance of Neoproterozoic and lower Paleozoic siliciclastic rocks of the central Ross orogen, Antarctica: Detrital record of rift-, passive-, and active-margin sedimentation: *Geological Society of America Bulletin*, v. 116, no. 9-10, p. 1253-1279.
- Gould, K., Pe-Piper, G., and Piper, D. J. W., 2010, Relationship of diagenetic chlorite rims to depositional facies in Lower Cretaceous reservoir sandstones of the Scotian Basin: *Sedimentology*, v. 57, no. 2, p. 587-610.
- Gradstein, F. M., Ogg, J. G., Schmitz, M. D., and Ogg, G. M., 2012, *The Geologic Time Scale*, Boston, Elsevier.

- Graham, G. H., 2014, From outcrop analogue to flow simulation: modelling heterogeneity in shallow-marine reservoirs [Ph.D.: Imperial College London, 266 p.
- Graham, J., and Etheridge, F. G., 1995, Sequence stratigraphic implications of gutter casts in the Skull Creek Shale, Lower Cretaceous, northern Colorado: *Mountain Geologist*, v. 32, no. 4, p. 95-106.
- Graham, J. P., 2000, Revised stratigraphy, depositional systems, and hydrocarbon exploration potential for the Lower Cretaceous Muddy Sandstone, northern Denver basin: *AAPG Bulletin*, v. 84, no. 2, p. 183-209.
- Graham, J. R., 1982, Transition from basin-plain to shelf deposits in the Carboniferous flysch of southern Morocco: *Sedimentary Geology*, v. 33, no. 3, p. 173-194.
- Greensmith, J. T., Rawson, P. F., and Shalaby, S. E., 1980, An association of minor fining-upward cycles and aligned gutter marks in the Middle Lias (Lower Jurassic) of the Yorkshire coast: *Proceedings of the Yorkshire Geological Society*, v. 42, no. 29, p. 525-538.
- Griffing, D. H., Bridge, J. S., and Hotton, C. L., 2000, Coastal-fluvial palaeoenvironments and plant palaeoecology of the Lower Devonian (Emsian), Gaspé Bay, Québec, Canada: Geological Society, London, Special Publication: *New Perspectives on the Old Red Sandstone*, v. 180, p. 61-84.
- Grifi, M., 2012, Stratigraphy and sedimentology of the Late Cretaceous (Coniacian) Muskiki and Marshybank Members, southern Alberta and northwestern Montana [M.S.: The University of Western Ontario, 192 p.
- Gürbüz, K., and Gül, M., 2005, Evolution of and factors controlling Eocene sedimentation in the Darende-Balaban basin, Malatya (Eastern Turkey): *Turkish Journal of Earth Sciences*, v. 14, no. 3, p. 311-335.
- Hagadorn, J. W., 2002, Chengjiang: Early record of the Cambrian Explosion, *in* Bottjer, D. J., Etter, W., Hagadorn, J. W., and Tang, C. M., eds., *Exceptional Fossil Preservation: A Unique View on the Evolution of Marine Life*: New York, Columbia University Press, p. 35-60.
- Hagadorn, J. W., and Miller, R. F., 2011, Hypothesized Cambrian medusae from Saint John, New Brunswick, reinterpreted as sedimentary structures: *Atlantic Geology*, v. 47, p. 66-80.
- Hallam, A., 1997, Estimates of the amount and rate of sea-level change across the Rhaetian-Hettangian and Pliensbachian-Toarcian boundaries (latest Triassic to early Jurassic): *Journal of the Geological Society, London*, v. 154, p. 773-779.
- Hamberg, L., and Nielsen, L. H., 2000, Shingled, sharp-based shoreface sandstones: depositional response to stepwise forced regression in a shallow basin, Upper Triassic Gassum Formation, Denmark, *in* Hunt, D., and Gawthorpe, R. L., eds., *Sedimentary Responses to Forced Regressions*: London, The Geological Society of London, p. 69-89.
- Hampson, G. J., 2000, Discontinuity surfaces, clinoforms, and facies architecture in a wave-dominated, shoreface-shelf parasequence: *Journal of Sedimentary Research*, v. 70, no. 2, p. 325-340.
- Hampson, G. J., Rodriguez, A. B., Storms, J. E. A., Johnson, H. D., and Meyer, C. T., 2008, Geomorphology and high-resolution stratigraphy of progradational wave-dominated shoreline deposits: impact on reservoir-scale facies architecture, *Recent Advances in Models of Siliciclastic Shallow-Marine Stratigraphy*, Volume 90, p. 117-142.

- Hansen, J. P. V., and Rasmussen, E. S., 2008, Structural, sedimentologic, and sea-level controls on sand distribution in a steep-clinoform asymmetric wave-influenced delta: Miocene Billund sand, eastern Danish North Sea and Jylland: *Journal of Sedimentary Research*, v. 78, no. 1-2, p. 130-146.
- Harazim, D., and McIlroy, D., 2015, Mud-rich density-driven flows along an Early Ordovician storm-dominated shoreline: Implications for shallow-marine facies models: *Journal of Sedimentary Research*, v. 85, no. 5, p. 509-528.
- Harris, P. T., and O'Brien, P. E., 1996, Geomorphology and sedimentology of the continental shelf adjacent to Mac. Robertson Land, East Antarctica: A scalped shelf: *Geo-Marine Letters*, v. 16, no. 4, p. 287-296.
- Hart, B. S., and Plint, A. G., 2003, Stratigraphy and sedimentology of shoreface and fluvial conglomerates: insights from the Cardium Formation in NW Alberta and adjacent British Columbia: *Bulletin of Canadian Petroleum Geology*, v. 51, no. 4, p. 437-464.
- Harun, N., 1987, Eighteen measured sections of the Lower Triassic Ivishak Formation in the Sadlerochit Mountains, northeastern Alaska.
- Hathway, B., 2016, Regional T-R sequence stratigraphy and lithostratigraphy of the Bearpaw Formation (Upper Campanian), west-central and southwestern Alberta plains: *Bulletin of Canadian Petroleum Geology*, v. 64, no. 3, p. 449-466.
- Hay, M. J., and Plint, A. G., 2009, An allostratigraphic framework for a retrogradational delta complex: the uppermost Dunvegan Formation (Cenomanian) in subsurface and outcrop, Alberta and British Columbia: *Bulletin of Canadian Petroleum Geology*, v. 57, no. 3, p. 323-349.
- Haynes, J. T., Johnson, E. A., and Whitmeyer, S. J., 2014, Active features along a “passive” margin: the intriguing interplay between Silurian–Devonian stratigraphy, Alleghanian deformation, and Eocene magmatism of Highland and Bath Counties, Virginia, *in* Bailey, C. M., and Coiner, L. V., eds., *Elevating Geoscience in the Southeastern United States: New Ideas about Old Terranes: Field Guides for the GSA Southeastern Section Meeting*, Blacksburg, Virginia, The Geological Society of America, p. 1-40.
- Henderson, A. L., Najman, Y., Parrish, R., Mark, D. F., and Foster, G. L., 2011, Constraints to the timing of India-Eurasia collision; a re-evaluation of evidence from the Indus Basin sedimentary rocks of the Indus-Tsangpo Suture Zone, Ladakh, India: *Earth-Science Reviews*, v. 106, no. 3-4, p. 265-292.
- Hillier, R. D., 2002, Depositional environment and sequence architecture of the Silurian Coralliferous Group, southern Pembrokeshire, UK: *Geological Journal*, v. 37, no. 3, p. 247-268.
- Hillier, R. D., and Morrissey, L. B., 2010, Process regime change on a Silurian siliciclastic shelf: controlling influences on deposition of the Gray Sandstone Formation, Pembrokeshire, UK: *Geological Journal*, v. 45, no. 1, p. 26-58.
- Hofmann, R., Hautmann, M., Wasmer, M., and Bucher, H., 2013, Palaeoecology of the Spathian Virgin Formation (Utah, USA) and its implications for the Early Triassic recovery: *Acta Palaeontologica Polonica*, v. 58, no. 1, p. 149-173.
- Hofmann, R., Mángano, M. G., Elicki, O., and Shinaq, R., 2012, Paleoecologic and biostratigraphic significance of trace fossils from shallow- to marginal-marine environments from the middle Cambrian (Stage 5) of Jordan: *Journal of Paleontology*, v. 86, no. 6, p. 931-955.



- Högström, A. E. S., Jensen, S., Palacios, T., and Ebbestad, J. O. R., 2013, New information on the Ediacaran-Cambrian transition in the Vestertana Group, Finnmark, northern Norway, from trace fossils and organic-walled microfossils: *Norwegian Journal of Geology*, v. 93, no. 2, p. 95-106.
- Holland, S. M., Meyer, D. L., and Miller, A. I., 2000, High-resolution correlation in apparently monotonous rocks: Upper Ordovician Kope Formation, Cincinnati Arch: *Palaaios*, v. 15, no. 1, p. 73-80.
- Holland, S. M., Miller, A. I., Meyer, D. L., and Dattilo, B. F., 2001, The detection and importance of subtle biofacies within a single lithofacies: The Upper Ordovician Kope Formation of the Cincinnati, Ohio region: *Palaaios*, v. 16, no. 3, p. 205-217.
- Holland, S. M., and Patzkowsky, M. E., 1997, Distal orogenic effects on peripheral bulge sedimentation: Middle and Upper Ordovician of the Nashville Dome: *Journal of Sedimentary Research*, v. 67, no. 2, p. 250-263.
- , 1998, Sequence stratigraphy and relative sea-level history of the Middle and Upper Ordovician of the Nashville Dome, Tennessee: *Journal of Sedimentary Research*, v. 68, no. 4, p. 684-699.
- Hong, E., 1997, Evolution of Pliocene to Pleistocene sedimentary environments in an arc-continent collision zone: evidence from the analyses of lithofacies and ichnofacies in the southwestern foothills of Taiwan: *Journal of Asian Earth Sciences*, v. 15, no. 4-5, p. 381-392.
- Horodyski, R. S., Holz, M., Grahn, Y., and Bosetti, E. P., 2014, Remarks on sequence stratigraphy and taphonomy of the Malvinokaffric shelly fauna during the KAČÁK Event in the Apucarana Sub-basin (Paraná Basin), Brazil: *International Journal of Earth Sciences*, v. 103, no. 1, p. 367-380.
- Hu, X. M., Jansa, L., and Wang, C. S., 2008, Upper Jurassic-Lower Cretaceous stratigraphy in south-eastern Tibet: a comparison with the western Himalayas: *Cretaceous Research*, v. 29, no. 2, p. 301-315.
- Hubert, J. F., 1966, Sedimentary history of Upper Ordovician geosynclinal rocks, Girvan, Scotland: *Journal of Sedimentary Petrology*, v. 36, no. 3, p. 677-699.
- Hubert, J. F., Scott, K. M., and Walton, E. K., 1966, Composite nature of Silurian flysch sandstones shown by groove molds on intra-bed surfaces, Peeblesshire, Scotland: *Journal of Sedimentary Petrology*, v. 36, no. 1, p. 237-241.
- Huggett, J. M., Gale, A. S., and Wray, D. S., 2005, Diagenetic clinoptilolite and opal-CT from the middle Eocene Wittering Formation, Isle of Wight, UK: *Journal of Sedimentary Research*, v. 75, no. 4, p. 585-595.
- Hughes, N. C., Sell, B. K., English, L. T., Myrow, P. M., and Singh, B. P., 2013, Cambrian trace fossils from the Parahio Formation (Tethyan Himalaya) in its type section and elsewhere: *Journal of the Palaeontological Society of India*, v. 58, no. 2, p. 175-193.
- Hutsky, A. J., and Fielding, C. R., 2017, Tectonic control on deltaic sediment dispersal in the middle to upper Turonian Western Cordilleran Foreland Basin, USA: *Sedimentology*, v. 64, no. 6, p. 1540-1571.
- Jennette, D. C., and Pryor, W. A., 1993, Cyclic alternation of proximal and distal storm facies: Kope and Fairview Formations (Upper Ordovician), Ohio and Kentucky: *Journal of Sedimentary Petrology*, v. 63, no. 2, p. 183-203.
- Jensen, S., 1997, Trace fossils from the lower Cambrian Mickwitzia Sandstone, south-central Sweden: *Fossils and Strata*, v. 42, p. 1-111.

- Jensen, S., Gehling, J. G., Droser, M. L., and Grant, S. F. W., 2002, A scratch circle origin for the medusoid fossil *Kullingia*: *Lethaia*, v. 35, no. 4, p. 291-299.
- Jensen, S., and Grant, S. W. F., 1998, Trace fossils from the Dividalen Group, northern Sweden: implications for Early Cambrian biostratigraphy of Baltica: *Norsk Geologisk Tidsskrift*, v. 78, no. 4, p. 305-317.
- Jerrett, R. M., Bennie, L. I., Flint, S. S., and Greb, S. F., 2016, Extrinsic and intrinsic controls on mouth bar and mouth bar complex architecture: examples from the Pennsylvanian (Upper Carboniferous) of the central Appalachian Basin, Kentucky, USA: *Geological Society of America Bulletin*, v. 128, no. 11-12, p. 1696-1716.
- Johnston, P. A., Collom, C. J., and Desjardins, P., 2017, Lower to Middle Cambrian of the southern Canadian Rockies, in Hsieh, J. C. C., ed., *Geologic Field Trips of the Canadian Rockies: 2017 Meeting of the GSA Rocky Mountain Section*, The Geological Society of America, p. 71-121.
- Jones, A. T., 2006, Wind-generated tool marks resembling trace fossils in a shallow estuarine environment: *Australian Journal of Earth Sciences*, v. 53, no. 4, p. 631-635.
- Jordan, O. D., Gupta, S., Hampson, G. J., and Johnson, H. D., 2016, Preserved stratigraphic architecture and evolution of a net-transgressive mixed wave- and tide-influenced coastal system: the Cliff House Sandstone, northwestern New Mexico, USA: *Journal of Sedimentary Research*, v. 86, no. 12, p. 1399-1424.
- Kahle, C. F., and Floyd, J. C., 1971, Stratigraphic and environmental significance of sedimentary structures in Cayugan (Silurian) tidal flat carbonates, northwestern Ohio: *Geological Society of America Bulletin*, v. 82, no. 8, p. 2071-2098.
- Kamola, D., and Louni, N., 2011, Density flow as the primary process of sediment emplacement in the delta front subenvironment: *Geological Society of America Abstracts with Programs: 2011 Annual Meeting*, v. 43, no. 5, p. 497.
- Kerr, M., and Eyles, N., 1991, Storm-deposited sandstones (tempestites) and related ichnofossils of the Late Ordovician Georgian Bay Formation, southern Ontario, Canada: *Canadian Journal of Earth Sciences*, v. 28, no. 2, p. 266-282.
- Key, R. M., Smith, R. A., Smelror, M., Saether, O. M., Thorsnes, T., Powell, J. H., Njange, F., and Zandamela, E. B., 2008, Revised lithostratigraphy of the Mesozoic-Cenozoic succession of the onshore Rovuma Basin, northern coastal Mozambique: *South African Journal of Geology*, v. 111, no. 1, p. 89-108.
- Khan, A. S., Kelling, G., Umar, M., and Kassi, A. M., 2002, Depositional environments and reservoir assessment of Late Cretaceous sandstones in the South Central Kirthar Foldbelt, Pakistan: *Journal of Petroleum Geology*, v. 25, no. 4, p. 373-406.
- Kim, Y. H. G., Rhee, C. W., Woo, J., and Park, T. Y. S., 2014, Depositional systems of the Lower Ordovician Mungok Formation in Yeongwol, Korea: implications for the carbonate ramp facies development: *Geosciences Journal*, v. 18, no. 4, p. 397-417.
- Klein, G. d., 1965, Dynamic significance of primary structures in the Middle Jurassic Great Oolite Series, southern England, in Middleton, G. V., ed., *Primary Sedimentary Structures and their Hydrodynamic Interpretations*, SEPM, p. 173-191.
- Knaust, D., 2002, Ichnogenus *Pholeus* Fiege, 1944, revisited: *Journal of Paleontology*, v. 76, no. 5, p. 882-891.
- , 2007, Invertebrate trace fossils and ichnodiversity in shallow-marine carbonates of the German Middle Triassic (Muschelkalk), in Bromley, R. G., ed., *Sediment-Organism Interactions: A Multifaceted Ichnology*, Volume 88, Society for Sedimentary Geology, p. 223-240.

- , 2013, The ichnogenus *Rhizocorallium*: Classification, trace makers, palaeoenvironments and evolution: *Earth-Science Reviews*, v. 126, p. 1-47.
- Knaust, D., and Langbein, R., 1995, Pot casts in the Upper Muschelkalk (Middle Triassic) of Weimar/Thuringia - composition, microfabrics and diagenesis: *Facies*, v. 33, p. 151-165.
- Korus, J. T., and Fielding, C. R., 2017, Hierarchical architecture of sequences and bounding surfaces in a depositional-dip transect of the fluvio-deltaic Ferron Sandstone (Turonian), southeastern Utah, U.S.A.: *Journal of Sedimentary Research*, v. 87, no. 8, p. 897-920.
- Krassay, A. A., 1994, Storm features of siliciclastic shelf sedimentation in the mid-Cretaceous epeiric seaway of northern Australia: *Sedimentary Geology*, v. 89, no. 3-4, p. 241-264.
- Kreisa, R. D., 1981, Storm-generated sedimentary structures in subtidal marine facies with examples from the Middle and Upper Ordovician of southwestern Virginia: *Journal of Sedimentary Petrology*, v. 51, no. 3, p. 823-848.
- Kreitner, M. A., and Plint, A. G., 2006, Allostratigraphy and paleogeography of the Upper Cenomanian, Lower Kaskapau Formation in subsurface and outcrop, Alberta and British Columbia: *Bulletin of Canadian Petroleum Geology*, v. 54, no. 2, p. 110-137.
- Kuhlemann, J., Spiegel, C., Dunkl, I., and Frisch, W., 1999, A contribution to middle Oligocene paleogeography of central Europe: New evidence from fission track ages of the southern Rhine graben: *Neues Jahrbuch für Geologie und Paläontologie-Abhandlungen*, v. 214, no. 3, p. 415-432.
- Kukal, Z., 1995, The Lower Cambrian Paseky Shale: *Sedimentology: Journal of the Czech Geological Society*, v. 40, no. 4, p. 67-78.
- Lamb, M. P., Myrow, P. M., Lukens, C., Houck, K., and Strauss, J., 2008, Deposits from wave-influenced turbidity currents: Pennsylvanian Minturn Formation, Colorado, USA: *Journal of Sedimentary Research*, v. 78, no. 7-8, p. 480-498.
- Lambert, R. St. J., 1971, The pre-Pleistocene Phanerozoic time scale—a review, in Harland, W. B., and Francis, E. H., eds., *The Phanerozoic Time-scale—a Supplement (Part 1)*: London, The Geological Society of London, p. 9-31.
- Lamens, J., 1985, Transition from turbidite to shallow-water sedimentation in the Lower Salmian (Tremadocian, Lower Ordovician) of the Stavelot Massif, Belgium: *Sedimentary Geology*, v. 44, no. 1-2, p. 121-142.
- Landing, E., Westrop, S. R., and Keppie, J. D., 2007, Terminal Cambrian and lowest Ordovician succession of Mexican west Gondwana: biotas and sequence stratigraphy of the Tiñu formation: *Geological Magazine*, v. 144, no. 6, p. 909-936.
- Lanier, W. P., Feldman, H. R., and Archer, A. W., 1993, Tidal sedimentation from a fluvial to estuarine transition, Douglas Group, Missourian-Virgilian, Kansas: *Journal of Sedimentary Petrology*, v. 63, no. 5, p. 860-873.
- Laurin, J., and Sageman, B. B., 2007, Cenomanian-Turonian coastal record in SW Utah, USA: orbital-scale transgressive-regressive events during Oceanic Anoxic Event II: *Journal of Sedimentary Research*, v. 77, no. 9-10, p. 731-756.
- Lavoie, D., 2004, The Lower Devonian Compton Formation in southern Quebec: from delta front to pro-delta sedimentation: *Canadian Journal of Earth Sciences*, v. 41, no. 5, p. 571-585.
- Lazar, O. R., Bohacs, K. M., Schieber, J., Macquaker, J. H., and Demko, T. M., 2015, Mudstone Primer: Lithofacies Variations, Diagnostic Criteria, and Sedimentologic-stratigraphic Implications at Lamina to Bedset Scales, v. 12.



- Lazo, D. G., Cichowolski, M., Rodríguez, D. L., and Aguirre-Urreta, M. B., 2005, Lithofacies, palaeoecology and palaeoenvironments of the Agrio Formation, Lower Cretaceous of the Neuquén Basin, Argentina, *in* Veiga, G. D., Spalletti, L. A., Howell, J. A., and Schwarz, E., eds., *The Neuquén Basin, Argentina: A Case Study in Sequence Stratigraphy and Basin Dynamics*: London, The Geological Society of London, p. 295-315.
- Le Heron, D. P., Meinhold, G., Page, A., and Whitham, A., 2013, Did lingering ice sheets moderate anoxia in the Early Palaeozoic of Libya?: *Journal of the Geological Society*, London, v. 170, no. 2, p. 327-339.
- Leckie, D. A., Schröder-Adams, C. J., and Bloch, J., 2000, The effect of paleotopography on the late Albian and Cenomanian sea-level record of the Canadian Cretaceous interior seaway: *Geological Society of America Bulletin*, v. 112, no. 8, p. 1179-1198.
- Leeper, W. S., 1963, Interpretation of primary bedding structures in Mississippian and Upper Devonian rocks of southeastern Somerset County, Pennsylvania, *in* Shepps, V. C., ed., *Symposium on Middle and Upper Devonian Stratigraphy of Pennsylvania and Adjacent States*: Harrisburg, PA, Pennsylvania Geological Survey, p. 165-181.
- Legler, B., Hampson, G. J., Jackson, C. A. L., Johnson, H. D., Massart, B. Y. G., Sarginson, M., and Ravnås, R., 2014, Facies relationships and stratigraphic architecture of distal, mixed tide- and wave-influenced deltaic deposits: lower Sego Sandstone, western Colorado, U.S.A.: *Journal of Sedimentary Research*, v. 84, no. 8, p. 605-625.
- Leonide, P., Borgomano, J., Masse, J.-P., and Doublet, S., 2012, Relation between stratigraphic architecture and multi-scale heterogeneities in carbonate platforms: The Barremian-lower Aptian of the Monts de Vaucluse, SE France: *Sedimentary Geology*, v. 265, p. 87-109.
- Lepain, D. L., Adams, K., and Mull, C. G., 1999, Outer-shelf to upper slope storm deposits in the Tingmerkpuk Sandstone (Neocomian), western north slope, Alaska, *The Alaska Geological Society 1999 Science and Technology Conference*, p. 19.
- Lerner, A. J., and Lucas, S. G., 2015, A *Selenichnites* ichnoassociation from early Permian tidal flats of the Prehistoric Trackways National Monument of south-central New Mexico, *in* Lucas, S. G., and DiMichele, W. A., eds., *Carboniferous-Permian Transition in the Robledo Mountains, Southern New Mexico*: Albuquerque, New Mexico Museum of Natural History and Science, p. 141-152.
- Leveridge, B. E., and Hartley, A. J., 2006, The Variscan Orogeny: the development and deformation of Devonian/Carboniferous basins in SW England and South Wales, *in* Brenchley, P. J., and Rawson, P. F., eds., *The geology of England and Wales*: London, Geological Society of London, p. 225-255.
- Lewis, T. L., 1988, Late Devonian and Early Mississippian distal basin-margin sedimentation of northern Ohio: *Ohio Journal of Science*, v. 88, no. 1, p. 23-39.
- Li, F. J., Zhang, H., Jing, X. G., and Cheng, X. Y., 2017, Palaeoenvironmental analysis of the ichnogenus *Zoophycos* in the Lower Devonian tempestite sediments of the Longmenshan area, Sichuan, China: *Palaeogeography, Palaeoclimatology, Palaeoecology*, v. 465, p. 156-167.
- Li, R. Y., and Allen, T., 2008, Llandovery (Early Silurian) orthide brachiopod associations from Anticosti Island, eastern Canada: *Canadian Journal of Earth Sciences*, v. 45, no. 2, p. 189-201.
- Liu, X., and Zhang, J., 2008, Coastal-open marine depositional system in the Kalpingtag Group of the Upper Silurian-Lower Ordovician in Kalping, northwest Tarim Basin, China:

- Proceedings of the 2008 International Workshop on Education Technology and Training and 2008 International Workshop on Geoscience and Remote Sensing, v. 1, p. 520-524.
- Lock, B. E., and Bases, F. S., 2008, Severe tropical weather in west Texas during the early Late Cretaceous?, AAPG Annual Convention: San Antonio, Texas.
- Lock, B. E., Butler, R. W., and Franklund, R. T., 2009, Tempestite sedimentation: an example from the Del Rio Formation of west Texas: Gulf Coast Association of Geological Societies Transactions, v. 59, p. 463-476.
- Long, D. G. F., 2007, Tempestite frequency curves: a key to Late Ordovician and Early Silurian subsidence, sea-level change, and orbital forcing in the Anticosti foreland basin, Quebec, Canada: Canadian Journal of Earth Sciences, v. 44, no. 3, p. 413-431.
- Lukasik, J., and James, N. P., 2006, Carbonate sedimentation, climate change and stratigraphic completeness on a Miocene cool-water epeiric ramp, Murray Basin, South Australia, *in* Pedley, H. M., and Carannante, G., eds., Cool-Water Carbonates: Depositional Systems and Palaeoenvironmental Controls: London, The Geological Society of London, p. 217-244.
- Lukasik, J. J., and James, N. P., 2003, Deepening-upward subtidal cycles, Murray Basin, South Australia: Journal of Sedimentary Research, v. 73, no. 5, p. 653-671.
- Macdonald, D. I. M., 1986, Storm-generated sandstone beds from the Upper Cretaceous of south Chile and their regional significance: Revista Geológica de Chile, v. 28-29, p. 69-76.
- Mackintosh, P. W., and Robertson, A. H. F., 2012, Late Devonian-Late Triassic sedimentary development of the central Taurides, S Turkey: Implications for the northern margin of Gondwana: Gondwana Research, v. 21, no. 4, p. 1089-1114.
- MacNaughton, R. B., 2002, Sedimentology of Triassic siliciclastic strata, Mount Martin and Mount Merrill map areas, Yukon Territory: Geological Survey of Canada.
- MacNaughton, R. B., Dalrymple, R. W., and Narbonne, G. M., 1997a, Early Cambrian braid-delta deposits, MacKenzie Mountains, north-western Canada: Sedimentology, v. 44, no. 4, p. 587-609.
- , 1997b, Multiple orders of relative sea-level change in an earliest Cambrian passive-margin succession, Mackenzie mountains, northwestern Canada: Journal of Sedimentary Research, v. 67, no. 4, p. 622-637.
- MacNaughton, R. B., and Fallas, K. M., 2014, Nainlin Formation, a new Middle Cambrian map unit from the Mackenzie Mountains, Northwest Territories: Bulletin of Canadian Petroleum Geology, v. 62, no. 2, p. 37-67.
- MacNaughton, R. B., and Narbonne, G. M., 1999, Evolution and ecology of Neoproterozoic lower Cambrian trace fossils, NW Canada: Palaios, v. 14, no. 2, p. 97-115.
- Manassero, M. J., Cingolani, C. A., and Abre, P., 2009, A Silurian-Devonian marine platform-deltaic system in the San Rafael Block, Argentine Precordillera-Cuyania terrane: lithofacies and provenance, *in* Königshof, P., ed., Devonian Change: Case Studies in Palaeogeography and Palaeoecology, Volume 314, p. 215-240.
- Mandal, A., Koner, A., Sarkar, S., Tawfik, H. A., Chakraborty, N., Bhakta, S., and Bose, P. K., 2016, Physico-chemical tuning of palaeogeographic shifts: Bhuj formation, Kutch, India: Marine and Petroleum Geology, v. 78, p. 474-492.
- Mángano, M. G., and Buatois, L. A., 2004, Ichnology of Carboniferous tide-influenced environments and tidal flat variability in the North American Midcontinent, *in* McIlroy, D., ed., The Application of Ichnology to Palaeoenvironmental and Stratigraphic Analysis: London, Geological Society, London, p. 157-178.

- Mángano, M. G., Buatois, L. A., West, R. R., and Maples, C. G., 1998, Contrasting behavioral and feeding strategies recorded by tidal-flat bivalve trace fossils from the upper Carboniferous of eastern Kansas: *Palaios*, v. 13, no. 4, p. 335-351.
- Mángano, M. G., Carmona, N. B., Buatois, L. A., and Guinea, F. M., 2005, A new ichnospecies of *Arthropycus* from the Upper Cambrian-Lower Tremadocian of northwest Argentina: Implications for the arthropycid lineage and potential in ichnostratigraphy: *Ichnos*, v. 12, no. 3, p. 179-190.
- Mann, P., and Burke, K., 1984, Cenozoic rift formation in the northern Caribbean: *Geology*, v. 12, no. 12, p. 732-736.
- Mansky, C. F., and Lucas, S. G., 2013, Romer's gap revisited: continental assemblages and ichno-assemblages from the basal Carboniferous of Blue Beach, Nova Scotia, Canada, *in* Lucas, S. G., DiMichele, W. A., Barrick, J. E., Schneider, J. W., and Spielmann, J. A., eds., *The Carboniferous-Permian Transition: Albuquerque, New Mexico Museum of Natural History and Science*, p. 244-273.
- Mapstone, N. B., and McIlroy, D., 2006, Ediacaran fossil preservation: Taphonomy and diagenesis of a discoid biota from the Amadeus Basin, central Australia: *Precambrian Research*, v. 149, no. 3-4, p. 126-148.
- Martini, I., and Sandrelli, F., 2015, Facies analysis of a Pliocene river-dominated deltaic succession (Siena Basin, Italy): Implications for the formation and infilling of terminal distributary channels: *Sedimentology*, v. 62, no. 1, p. 234-265.
- Masterson, K. J., 2015, Hyperpycnal flow deposition and sequence stratigraphy of a Cretaceous near-shore mudstone unit - the Skull Creek Shale Formation, Colorado, USA [M.S.: Colorado State University, 129 p.
- McCall, G. J. H., 2002, A summary of the geology of the Iranian Makran, *in* Clift, P. D., Kroon, D., Gaedicke, C., and Craig, J., eds., *The Tectonic and Climatic Evolution of the Arabian Sea Region: London, The Geological Society of London*, p. 147-204.
- McCann, T., Chalot-Prat, F., and Saintot, A., 2010, The Early Mesozoic evolution of the Western Greater Caucasus (Russia): Triassic-Jurassic sedimentary and magmatic history, *in* Sosson, M., Kaymakci, N., Stephenson, R. A., Bergerat, F., and Starostenko, V., eds., *Sedimentary Basin Tectonics from the Black Sea and Caucasus to the Arabian Platform: London, The Geological Society of London*, p. 181-238.
- McClung, W. S., Eriksson, K. A., Terry, D. O., and Cuffey, C. A., 2013, Sequence stratigraphic hierarchy of the Upper Devonian Foreknobs Formation, central Appalachian Basin, USA: Evidence for transitional greenhouse to icehouse conditions: *Palaeogeography, Palaeoclimatology, Palaeoecology*, v. 387, p. 104-125.
- McIlroy, D., and Brasier, M. D., 2017, Ichnological evidence for the Cambrian explosion in the Ediacaran to Cambrian succession of Tanafjord, Finnmark, northern Norway, *in* Brasier, A. T., McIlroy, D., and McLoughlin, N., eds., *Earth System Evolution and Early Life: A Celebration of the Work of Martin Brasier, The Geological Society of London*, p. 351-368.
- McIlroy, D., and Heys, G. R., 1997, Palaeobiological significance of *Plagiogmus arcuatus* from the lower Cambrian of central Australia: *Alcheringa*, v. 21, no. 3-4, p. 161-178.
- McKie, T., 1994, Geostrophic versus friction-dominated storm flow: palaeocurrent evidence from the Late Permian Brotherton Formation, England: *Sedimentary Geology*, v. 93, no. 1-2, p. 73-84.

- McLaughlin, P. I., and Brett, C. E., 2004, Eustatic and tectonic control on the distribution of marine seismites: examples from the Upper Ordovician of Kentucky, USA: *Sedimentary Geology*, v. 168, no. 3-4, p. 165-192.
- McLaughlin, P. I., Cramer, B. D., Brett, C. E., and Kleffner, M. A., 2008, Silurian high-resolution stratigraphy on the Cincinnati Arch: progress on recalibrating the layer-cake, *in* Maria, A. H., and Counts, R. C., eds., *From the Cincinnati Arch to the Illinois Basin: Geological Field Excursions along the Ohio River Valley*, The Geological Society of America, p. 119–180.
- Mellere, D., and Steel, R., 2000, Style contrast between forced regressive and lowstand/transgressive wedges in the Campanian of south-central Wyoming (Hatfield Member of the Haystack Mountains Formation), *in* Hunt, D., and Gawthorpe, R. L., eds., *Sedimentary Responses to Forced Regressions*: London, The Geological Society of London, p. 141-162.
- Meyer, D. L., Brett, C. E., Dattilo, B. F., and Fine, R., 2016, Inverted trilobites: key to complex preservation of an organically textured surface in offshore siliciclastic mudstone and carbonate facies: Kope Formation (Upper Ordovician), Kenton County, Kentucky, USA: *Palaaios*, v. 31, no. 10, p. 453-462.
- Michalak, S., 2013, A record of Bajocian and early Bathonian restricted marine sedimentation along the cratonic margin of the Sundance Sea, Bighorn Basin, WY [M.S.: Dartmouth College, 164 p.
- Miller, J. F., Evans, K. R., and Dattilo, B. F., 2012, The great American carbonate bank in the miogeocline of western central Utah: tectonic influences on sedimentation, *in* Derby, J. R., Fritz, R. D., Longacre, S. A., Morgan, W. A., and Sternbach, C. A., eds., *The great American carbonate bank: the geology and economic resources of the Cambrian – Ordovician Sauk megasequence of Laurentia*, The American Association of Petroleum Geologists, p. 769-854.
- Millson, J. A., Quin, J. G., Idiz, E., Turner, P., and Al-Harthy, A., 2008, The Khazzan gas accumulation, a giant combination trap in the Cambrian Barik Sandstone Member, Sultanate of Oman: Implications for Cambrian petroleum systems and reservoirs: *AAPG Bulletin*, v. 92, no. 7, p. 885-917.
- Mochizuki, T., Oji, T., Zhao, Y. L., Peng, J., Yang, X. L., and Gonchigdorj, S., 2014, Diachronous increase in early Cambrian ichnofossil size and benthic faunal activity in different climatic regions: *Journal of Paleontology*, v. 88, no. 2, p. 331-338.
- Moreno, C. J., Horton, B. K., Caballero, V., Mora, A., Parra, M., and Sierra, J., 2011, Depositional and provenance record of the Paleogene transition from foreland to hinterland basin evolution during Andean orogenesis, northern Middle Magdalena Valley Basin, Colombia: *Journal of South American Earth Sciences*, v. 32, no. 3, p. 246-263.
- Mount, J. F., 1982, Storm-surge-ebb origin of hummocky cross-stratified units of the Andrews Mountain Member, Campito Formation (Lower Cambrian), White-Inyo Mountains, eastern California: *Journal of Sedimentary Petrology*, v. 52, no. 3, p. 941-958.
- , 1993, Formation of fluidization pipes during liquefaction: examples from the Uratanna Formation (Lower Cambrian), South Australia: *Sedimentology*, v. 40, no. 6, p. 1027-1037.
- Moya, M. C., 1988, Lower Ordovician in the southern part of the Argentine eastern Cordillera, *in* Bahlburg, H., Breikreuz, C., and Giese, P., eds., *The Southern Central Andes*: Berlin, Springer-Verlag.

- Müller, R. D., and Spielhagen, R. F., 1990, Evolution of the Central Tertiary Basin of Spitsbergen: towards a synthesis of sediment and plate tectonic history: *Palaeogeography, Palaeoclimatology, Palaeoecology*, v. 80, no. 2, p. 153-172.
- Murphy, M. A., and Schlanger, S. O., 1962, Sedimentary structures in Ilhas and São Sebastião Formations (Cretaceous), Recôncavo Basin, Brazil: *AAPG Bulletin*, v. 46, no. 4, p. 457-477.
- Murphy, S. J., 2001, Influence of the West Virginia Dome on paleocurrent patterns in the Upper Devonian-Lower Mississippian Price Formation in the Central Appalachians [M.S.: West Virginia University, 315 p.
- Myrow, P. M., 1992, Pot and gutter casts from the Chapel Island Formation, southeast Newfoundland: *Journal of Sedimentary Petrology*, v. 62, no. 6, p. 992-1007.
- Myrow, P. M., and Chen, J. T., 2015, Estimates of large magnitude Late Cambrian earthquakes from seismogenic soft-sediment deformation structures: Central Rocky Mountains: *Sedimentology*, v. 62, no. 3, p. 621-644.
- Myrow, P. M., Chen, J. T., Snyder, Z., Leslie, S., Fike, D. A., Fanning, C. M., Yuan, J. L., and Tang, P., 2015, Depositional history, tectonics, and provenance of the Cambrian-Ordovician boundary interval in the western margin of the North China block: *Geological Society of America Bulletin*, v. 127, no. 9-10, p. 1174-1193.
- Myrow, P. M., Fischer, W., and Goodge, J. W., 2002, Wave-modified turbidites: Combined-flow shoreline and shelf deposits, Cambrian, Antarctica: *Journal of Sedimentary Research*, v. 72, no. 5, p. 641-656.
- Myrow, P. M., Lamb, M., Lukens, C., Houck, K., Kluth, C., and Parsons, J., 2010, Hyperpycnal wave-modified turbidites of the Pennsylvanian Minturn Formation, north-central Colorado: Department of Geology, Colorado College Minturn Fieldtrip, p. 1-23.
- Myrow, P. M., Lukens, C., Lamb, M. P., Houck, K., and Strauss, J., 2008, Dynamics of a transgressive prodeltaic system: implications for geography and climate within a Pennsylvanian intracratonic basin, Colorado, USA: *Journal of Sedimentary Research*, v. 78, no. 7-8, p. 512-528.
- Myrow, P. M., Snell, K. E., Hughes, N. C., Paulsen, T. S., Heim, N. A., and Parcha, S. K., 2006, Cambrian depositional history of the Zaskar Valley region of the Indian Himalaya: Tectonic implications: *Journal of Sedimentary Research*, v. 76, no. 1-2, p. 364-381.
- Narbonne, G. M., Myrow, P., Landing, E., and Anderson, M. M., 1991, A Chondrophorine (Medusoid Hydrozoan) from the Basal Cambrian (Placentian) of Newfoundland: *Journal of Paleontology*, v. 65, no. 2, p. 186-191.
- Noad, J., 2015, When storms go bad: their impact on gutter cast distribution and dimensions, based on new data from the Miocene of eastern Borneo, GeoConvention 2015: New Horizons: Calgary, Alberta, Canada, p. 1-5.
- Nouidar, M., and Chellai, E. H., 2002, Facies and sequence stratigraphy of a Late Barremian wave-dominated deltaic deposit, Agadir Basin, Morocco: *Sedimentary Geology*, v. 150, no. 3-4, p. 375-384.
- Ojakangas, R. W., 1968, Cretaceous sedimentation, Sacramento Valley, California: *Geological Society of America Bulletin*, v. 79, no. 8, p. 973-1008.
- Olariu, C., Steel, R. J., and Petter, A. L., 2010, Delta-front hyperpycnal bed geometry and implications for reservoir modeling: Cretaceous Panther Tongue delta, Book Cliffs, Utah: *AAPG Bulletin*, v. 94, no. 6, p. 819-845.



- Owen, G., 1994, Current crescents from the Herreria Formation (Lower Cambrian) of northern Spain: *Sedimentology*, v. 41, no. 2, p. 211-213.
- Painter, C. S., York-Sowecke, C. C., and Carrapa, B., 2013, Sequence stratigraphy of the Upper Cretaceous Sego Sandstone Member reveals spatio-temporal changes in depositional processes, northwest Colorado, USA: *Journal of Sedimentary Research*, v. 83, no. 3-4, p. 323-338.
- Palladino, G., 2011, Tectonic and eustatic controls on Pliocene accommodation space along the front of the southern Apennine thrust-belt (Basilicata, southern Italy): *Basin Research*, v. 23, no. 5, p. 591-614.
- Pattison, S. A. J., 2005a, Recognition and interpretation of isolated shelf turbidite bodies in the Cretaceous Western Interior, Book Cliffs, Utah, *in* Pederson, J., and Dehler, C. M., eds., *Interior Western United States*, The Geological Society of America, p. 479-504.
- , 2005b, Storm-influenced prodelta turbidite complex in the lower Kenilworth Member at Hatch Mesa, Book Cliffs, Utah, U.S.A.: implications for shallow marine facies models: *Journal of Sedimentary Research*, v. 75, no. 3, p. 420-439.
- Pattison, S. A. J., Williams, H., and Davies, P., 2007, Clastic sedimentology, sedimentary architecture, and sequence stratigraphy of fluvio-deltaic, shoreface and shelf deposits, Upper Cretaceous, Book Cliffs, eastern Utah and western Colorado, *in* Reynolds, R. G., ed., *Roaming the Rocky Mountains and Environs: Geological Field Trips*, The Geological Society of America, p. 17-43.
- Pease, C. M., 1992, On the declining extinction and origination rates of fossil taxa: *Paleobiology*, v. 18, no. 1, p. 89-92.
- Pérez-López, A., 2001, Significance of pot and gutter casts in a Middle Triassic carbonate platform, Betic Cordillera, southern Spain: *Sedimentology*, v. 48, no. 6, p. 1371-1388.
- Pérez-López, A., and Pérez-Valera, F., 2012, Tempestite facies models for the epicontinental Triassic carbonates of the Betic Cordillera (southern Spain): *Sedimentology*, v. 59, no. 2, p. 646-678.
- Peters, S. E., Antar, M. S. M., Zalmout, I. S., and Gingerich, P. D., 2009, Sequence stratigraphic control on preservation of late Eocene whales and other vertebrates at Wadi Al-Hitan, Egypt: *Palaaios*, v. 24, no. 5-6, p. 290-302.
- Peters, S. E., and Husson, J. M., 2017, Sediment cycling on continental and oceanic crust: *Geology*, v. 45, no. 4, p. 323-326.
- Phillips, E. R., Waters, C. N., and Ellison, R. A., 2013, The Jurassic–Cretaceous depositional and tectonic evolution of the southwestern margin of the Neotethys Ocean, Northern Oman and United Arab Emirates, *in* Al Hosani, K., Roure, F., Ellison, R., and Lokier, S., eds., *Lithosphere Dynamics and Sedimentary Basins: The Arabian Plate and Analogues*: Berlin, Springer-Verlag, p. 61-100.
- Picard, M. D., and High, L. R., 1968, Shallow marine currents on the Early (?) Triassic Wyoming shelf: *Journal of Sedimentary Petrology*, v. 38, no. 2, p. 411-423.
- Pirouz, M., Simpson, G., Castelstort, S., Gorin, G., and Bahroudi, A., 2016, Controls on the sequence stratigraphic architecture of the Neogene Zagros foreland basin, *in* Sorkhabi, R., ed., *Tectonic Evolution, Collision, and Seismicity of Southwest Asia: In Honor of Manuel Berberian's Forty-Five Years of Research Contributions*, The Geological Society of America.

- Playford, G., Borghi, L., Lobato, G., and Melo, J. H. G., 2012, Palynological dating and correlation of Early Mississippian (Tournaisian) diamictite sections, Parnaíba Basin, northeastern Brazil: *Revista Española de Micropaleontología*, v. 44, no. 1-3, p. 1-22.
- Plink-Björklund, P., 2008, Wave-to-tide facies change in a Campanian shoreline complex, Chimney Rock Tongue, Wyoming-Utah, U.S.A, *in* Hampson, G. J., Steel, R. J., Burgess, P. M., and Dalrymple, R. W., eds., *Recent Advances in Models of Siliciclastic Shallow-Marine Stratigraphy*, Volume 90: Tulsa, Oklahoma, SEPM, p. 265-291.
- Plint, A. G., 2000, Sequence stratigraphy and paleogeography of a Cenomanian deltaic complex: the Dunvegan and lower Kaskapau formations in subsurface and outcrop, Alberta and British Columbia, Canada: *Bulletin of Canadian Petroleum Geology*, v. 48, no. 1, p. 43-79.
- , 2014, Mud dispersal across a Cretaceous prodelta: Storm-generated, wave-enhanced sediment gravity flows inferred from mudstone microtexture and microfacies: *Sedimentology*, v. 61, no. 3, p. 609-647.
- Plint, A. G., and Cheadle, B. A., 2015, Reply to the Discussion by Schieber on "Mud dispersal across a Cretaceous prodelta: Storm-generated, wave-enhanced sediment gravity flows inferred from mudstone microtexture and microfacies" by Plint (2014), *Sedimentology* 61, 609-647: *Sedimentology*, v. 62, no. 1, p. 394-400.
- Plint, A. G., and Kreitner, M. A., 2007, Extensive thin sequences spanning Cretaceous foredeep suggest high-frequency eustatic control: late Cenomanian, Western Canada foreland basin: *Geology*, v. 35, no. 8, p. 735-738.
- Plint, A. G., Macquaker, J. H. S., and Varban, B. L., 2012, Bedload transport of mud across a wide, storm influenced ramp: Cenomanian-Turonian Kaskapau Formation, Western Canada foreland basin: *Journal of Sedimentary Research*, v. 82, no. 11-12, p. 801-822.
- Plint, A. G., and Nummedal, D., 2000, The falling stage systems tract: recognition and importance in sequence stratigraphic analysis, *in* Hunt, D., and Gawthorpe, R. L., eds., *Sedimentary Responses to Forced Regressions*: London, The Geological Society of London, p. 1-17.
- Plint, A. G., Tyagi, A., Hay, M. J., Varban, B. L., Zhang, H., and Roca, X., 2009, Clinoforms, paleobathymetry, and mud dispersal across the Western Canada Cretaceous Foreland Basin: evidence from the Cenomanian Dunvegan Formation and contiguous strata: *Journal of Sedimentary Research*, v. 79, no. 3-4, p. 144-161.
- Pöppelreiter, M., and Aigner, T., 2003, Unconventional pattern of reservoir facies distribution in epeiric successions: lessons from an outcrop analog (Lower Keuper, Germany): *AAPG Bulletin*, v. 87, no. 1, p. 39-70.
- Porębski, S. J., Prugar, W., and Zacharski, J., 2013, Silurian shales of the East European Platform in Poland - some exploration problems: *Przegląd Geologiczny*, v. 61, p. 1-9.
- Powell, C. M., Baillie, P. W., and VandenBerg, A. H. M., 2003, Silurian to mid-Devonian basin development of the Melbourne Zone, Lachlan Fold Belt, southeastern Australia: *Tectonophysics*, v. 375, p. 9-36.
- Powell, J. H., 2010, Jurassic sedimentation in the Cleveland Basin: a review: *Proceedings of the Yorkshire Geological Society*, v. 58, p. 21-72.
- Poyatos-Moré, M., Jones, G. D., Brunt, R. L., Hodgson, D. M., Wild, R. J., and Flint, S. S., 2016, Mud-dominated basin-margin progradation: processes and implications: *Journal of Sedimentary Research*, v. 86, no. 8, p. 863-878.

- Pratt, B. R., 2002, Storms versus tsunamis: Dynamic interplay of sedimentary, diagenetic, and tectonic processes in the Cambrian of Montana: *Geology*, v. 30, no. 5, p. 423-426.
- Prave, A. R., Duke, W. L., and Slattery, W., 1996, A depositional model for storm- and tide-influenced prograding siliciclastic shorelines from the Middle Devonian of the central Appalachian foreland basin, USA: *Sedimentology*, v. 43, no. 4, p. 611-629.
- Prentice, J. E., 1960, Flow structures in sedimentary rocks: *The Journal of Geology*, v. 68, no. 2, p. 217-225.
- Quaglio, F., Warren, L. V., Anelli, L. E., Dos Santos, P. R., Rocha-Campos, A. C., Gaździcki, A., Strikis, P. C., Ghilardi, R. P., Tiossi, A. B., and Simões, M. G., 2014, Shell beds from the Low Head Member (Polonez Cove Formation, early Oligocene) at King George Island, west Antarctica: new insights on facies analysis, taphonomy and environmental significance: *Antarctic Science*, v. 26, no. 4, p. 400-412.
- Quiquerez, A., and Dromart, G., 2006, Environmental control on granular clinoforms of ancient carbonate shelves: *Geological Magazine*, v. 143, no. 3, p. 343-365.
- Radley, J. D., 2008, Seafloor erosion and sea-level change: Early Jurassic Blue Lias Formation of central England: *Palaeogeography, Palaeoclimatology, Palaeoecology*, v. 270, no. 3-4, p. 287-294.
- , 2011, Biostratigraphic signature of Penarth Group (Upper Triassic) shell concentrations (Severn Estuary, South-West England): A preliminary account: *Geoscience in South-West England*, v. 12, p. 351-355.
- Radley, J. D., and Barker, M. J., 2000, Palaeoenvironmental significance of storm coquinas in a Lower Cretaceous coastal lagoonal succession (Vectis Formation, Isle of Wight, southern England): *Geological Magazine*, v. 137, no. 2, p. 193-205.
- Radley, J. D., Barker, M. J., and Harding, I. C., 1998, Palaeoenvironment and taphonomy of dinosaur tracks in the Vectis Formation (Lower Cretaceous) of the Wessex Sub-basin, southern England: *Cretaceous Research*, v. 19, no. 3-4, p. 471-487.
- Rahman, A. H. A., Menier, D., and Mansor, M. Y., 2014, Sequence stratigraphic modelling and reservoir architecture of the shallow marine successions of Baram field, West Baram Delta, offshore Sarawak, East Malaysia: *Marine and Petroleum Geology*, v. 58, p. 687-703.
- Ranger, M. J., Pickerill, R. K., and Fillion, D., 1984, Lithostratigraphy of the Cambrian?-Lower Ordovician Bell Island and Wabana Groups of Bell, Little Bell, and Kellys Islands, Conception Bay, eastern Newfoundland: *Canadian Journal of Earth Sciences*, v. 21, no. 11, p. 1245-1261.
- Raup, D. M., 1976, Species diversity in the Phanerozoic: An interpretation: *Paleobiology*, v. 2, p. 289-297.
- Reicherter, K., Pletsch, T., Kuhnt, W., Manthey, J., Homeier, G., Wiedmann, J., and Thurow, J., 1994, Mid-Cretaceous paleogeography and paleoceanography of the Betic Seaway (Betic Cordillera, Spain): *Palaeogeography, Palaeoclimatology, Palaeoecology*, v. 107, no. 1-2, p. 1-33.
- Reif, D. M., and Slatt, R. M., 1979, Red bed members of the Lower Triassic Moenkopi Formation, southern Nevada: Sedimentology and paleogeography of a muddy tidal flat deposit: *Journal of Sedimentary Petrology*, v. 49, no. 3, p. 869-889.
- Richards, R. P., 1974, Mississippian discinid brachiopods attached to a soft-bodied organism: *The Ohio Journal of Science*, v. 74, no. 3, p. 174-181.



- Robertson, P. B., 2014, Part I: Neoacadian to Alleghanian foreland basin development and provenance in the central Appalachian orogen, Pine Mountain thrust sheet; Part II: Structural configuration of a modified Mesozoic to Cenozoic forearc basin system, south-central Alaska [M.S.: Purdue University, 199 p.
- Rodríguez-López, J. P., Meléndez, N., Soria, A. R., Liesa, C. L., and Van Loon, A. J., 2007, Lateral variability of ancient seismites related to differences in sedimentary facies (the synrift Escucha Formation, mid-Cretaceous, eastern Spain): *Sedimentary Geology*, v. 201, no. 3-4, p. 461-484.
- Rodríguez-Tovar, F. J., and Pérez-Valera, F., 2008, Trace fossil *Rhizocorallium* from the Middle Triassic of the Betic Cordillera, southern Spain: characterization and environmental implications: *Palaaios*, v. 23, no. 1-2, p. 78-86.
- Roetzel, R., and Pervesler, P., 2004, Storm-induced event deposits in the type area of the Grund Formation (Middle Miocene, Lower Badenian) in the Molasse Zone of Lower Austria: *Geologica Carpathica*, v. 55, no. 2, p. 87-102.
- Romano, M., 1974, Lower Ordovician crescent casts from the "Armorican Quartzite" of North Portugal: *Comunicações dos Serviços Geológicos de Portugal*, v. 57, p. 53-59.
- Rygel, M. C., Calder, J. H., Gibling, M. R., Gingras, M. K., and Melrose, C. S. A., 2006, Tournaisian forested wetlands in the Horton Group of Atlantic Canada, *in* Greb, S. F., and DiMichele, W. A., eds., *Wetlands through Time*, Geological Society of America, p. 103-126.
- Sageman, B. B., 1996, Lowstand tempestites: Depositional model for Cretaceous skeletal limestones, Western Interior basin: *Geology*, v. 24, no. 10, p. 888-892.
- Sánchez-Moya, Y., Herrero, M. J., and Sopeña, A., 2016, Strontium isotopes and sedimentology of a marine Triassic succession (upper Ladinian) of the westernmost Tethys, Spain: *Journal of Iberian Geology*, v. 42, no. 2, p. 171-186.
- Sanchez, T. M., Waisfeld, B., and Benedetto, J. L., 1991, Lithofacies, taphonomy, and brachiopod assemblages in the Silurian of western Argentina: A review of Malvinokaffric Realm communities: *Journal of South American Earth Sciences*, v. 4, no. 4, p. 307-329.
- Savazzi, E., 2015, The early Cambrian Eophyton toolmark and its producer: *Paleontological Research*, v. 19, no. 1, p. 61-75.
- Savrda, C. E., Counts, J. W., Bigham, E., and Martin, S., 2010, Ichnology of siliceous facies in the Eocene Tallahatta Formation (eastern United States Gulf coastal plain): implications for depositional conditions, storm processes, and diagenesis: *Palaaios*, v. 25, no. 9-10, p. 642-655.
- Schiappa, T. A., and Snyder, W. S., 1998, Stratigraphy and sequence stratigraphy of Kondurovka and Novogafarovo, the potential Sakmarian boundary stratotype, southern Ural Mountains, Russia: *Permophiles*, v. 32, p. 2-6.
- Schieber, J., 1999, Distribution and deposition of mudstone facies in the Upper Devonian Sonyea Group of New York: *Journal of Sedimentary Research*, v. 69, no. 4, p. 909-925.
- Schneck, W. M., and Fritz, W. J., 1985, An amphibian trackway (*Cincosaurus cobbi*) from the Lower Pennsylvanian ("Pottsville") of Lookout Mountain, Georgia: A first occurrence: *Journal of Paleontology*, v. 59, no. 5, p. 1243-1250.
- Schwarz, E., and Howell, J. A., 2005, Sedimentary evolution and depositional architecture of a lowstand sequence set: the Lower Cretaceous Mulichinco Formation, Neuquén Basin, Argentina, *in* Veiga, G. D., Spalletti, L. A., Howell, J. A., and Schwarz, E., eds., *The*

- Neuquén Basin, Argentina: A Case Study in Sequence Stratigraphy and Basin Dynamics: London, The Geological Society of London, p. 109-138.
- Scott, R. W., 2015, Wrinkled sandstone in Missourian Wann Formation, Lake Keystone, Oklahoma: Geological Society of America Abstracts with Programs: 2015 Annual Meeting of the South-Central Section, v. 47, no. 1, p. 6.
- Scott, R. W., Laali, H., and Fee, D. W., 1975, Density-current strata in Lower Cretaceous Washita Group, north-central Texas: *Journal of Sedimentary Petrology*, v. 45, no. 2, p. 562-575.
- Selwood, E. B., and Thomas, J. M., 1986, Upper Paleozoic successions and nappe structures in north Cornwall: *Journal of the Geological Society, London*, v. 143, p. 75-82.
- Shahkarami, S., Mangano, M. G., and Buatois, L. A., 2017, Discriminating ecological and evolutionary controls during the Ediacaran-Cambrian transition: Trace fossils from the Soltanieh Formation of northern Iran: *Palaeogeography Palaeoclimatology Palaeoecology*, v. 476, p. 15-27.
- Shannon, P. M., 1978, The stratigraphy and sedimentology of the Lower Palaeozoic rocks of south-east County Wexford: *Proceedings of the Royal Irish Academy. Section B: Biological, Geological, and Chemical Science*, v. 78, no. 16, p. 247-265.
- Shen, Y., and Neuweiler, F., 2015, *Halysis* Høeg, 1932 in Ordovician carbonate mounds, Tarim Basin, NW China: *Palaaios*, v. 30, no. 9, p. 692-706.
- Singh, B. P., and Singh, H., 1995, Evidence of tidal influence in the Murree Group of rocks of the Jammu Himalaya, India, in Flemming, B. W., and Bartholomä, A., eds., *Tidal Signatures in Modern and Ancient Sediments*, Blackwell Science, p. 343-351.
- Singh, B. P., and Srivastava, A. K., 2011, Storm activities during the sedimentation of Late Paleocene-Middle Eocene Subathu Formation, western Himalayan foreland basin: *Journal of the Geological Society of India*, v. 77, no. 2, p. 130-136.
- Sixsmith, P. J., Hampson, G. J., Gupta, S., Johnson, H. D., and Fofana, J. F., 2008, Facies architecture of a net transgressive sandstone reservoir analog: the Cretaceous Hosta Tongue, New Mexico: *AAPG Bulletin*, v. 92, no. 4, p. 513-547.
- Smith, G. J., and Jacobi, R. D., 2001, Tectonic and eustatic signals in the sequence stratigraphy of the Upper Devonian Canadaway Group, New York state: *AAPG Bulletin*, v. 85, no. 2, p. 325-357.
- Smrecak, T. A., and Brett, C. E., 2014, Establishing patterns in sclerobiont distribution in a Late Ordovician (Cincinnatian) depth gradient: toward a sclerobiofacies model: *Palaaios*, v. 29, no. 1-2, p. 74-85.
- Stanley, D. J., 1971, Fish-produced markings on the outer continental margin east of the middle Atlantic states: *Journal of Sedimentary Petrology*, v. 41, no. 1, p. 159-170.
- Sutton, R. G., Bowen, Z. P., and McAlester, A. L., 1970, Marine shelf environments of the Upper Devonian Sonyea Group of New York: *Geological Society of America Bulletin*, v. 81, no. 10, p. 2975-2992.
- Sutton, S. J., Ethridge, F. G., Almon, W. R., Dawson, W. C., and Edwards, K. K., 2004, Textural and sequence-stratigraphic controls on sealing capacity of Lower and Upper Cretaceous shales, Denver basin, Colorado: *AAPG Bulletin*, v. 88, no. 8, p. 1185-1206.
- Sweetman, S., 2015, Vertebrate palaeontology of the Lower Cretaceous Wealden Group of the Isle of Wight: *SVPCA Post-Symposium Field Trip Guide*, p. 1-26.
- Swift, D. J. P., Hudelson, P. M., Brenner, R. L., and Thompson, P., 1987, Shelf construction in a foreland basin: storm beds, shelf sandbodies, and shelf-slope depositional sequences in

- the Upper Cretaceous Mesaverde Group, Book Cliffs, Utah: *Sedimentology*, v. 34, no. 3, p. 423-457.
- Swift, D. J. P., Parsons, S. B., and Howell, K. A., 2008, Campanian continental and shallow marine architecture in a eustatically modified clastic wedge: Mesaverde Group, Wyoming, U.S.A., *in* Hampson, G. J., Steel, R. J., Burgess, P. M., and Dalrymple, R. W., eds., *Recent Advances in Models of Siliciclastic Shallow-Marine Stratigraphy*: Tulsa, Oklahoma, SEPM, p. 473-490.
- Taghipour, B., and Mackizadeh, M. A., 2012, Geological environment of the zeolite origin in the Central Alborz Range, Northern Iran: *Neues Jahrbuch für Geologie und Paläontologie-Abhandlungen*, v. 265, no. 3, p. 235-248.
- Tarhan, L. G., Droser, M. L., and Hughes, N. C., 2014, Exceptional trace fossil preservation and mixed layer development in Cambro-Ordovician siliciclastic strata: *Memoirs of the Association of Australasian Palaeontologists*, v. 45, p. 71-88.
- Tarhan, L. G., Droser, M. L., Planavsky, N. J., and Johnston, D. T., 2015, Protracted development of bioturbation through the early Palaeozoic Era: *Nature Geoscience*, v. 8, no. 11, p. 865-869.
- Tarhan, L. G., Jensen, S., and Droser, M. L., 2012, Furrows and firmgrounds: evidence for predation and implications for Palaeozoic substrate evolution in *Rusophycus* burrows from the Silurian of New York: *Lethaia*, v. 45, p. 329-341.
- Taylor, K. G., Simo, J. A., Yocum, D., and Leckie, D. A., 2002, Stratigraphic significance of ooidal ironstones from the Cretaceous Western Interior Seaway: the Peace River Formation, Alberta, Canada, and the Castlegate Sandstone, Utah, USA: *Journal of Sedimentary Research*, v. 72, no. 2, p. 316-327.
- Thomson, T. J., 2014, Paleoenvironmental controls on the preservation of tetrapod swim tracks from the Lower to Middle Triassic Moenkopi Formation, Utah [M.S.: University of California, Riverside, 58 p.
- Tokuhashi, S., 1996, Shallow-marine turbiditic sandstones juxtaposed with deep-marine ones at the eastern margin of the Niigata Neogene backarc basin, central Japan: *Sedimentary Geology*, v. 104, no. 1-4, p. 99-116.
- Tortello, M. F., and Esteban, S. B., 2014, Early Ordovician trilobites from the Nazareno area, northwestern Argentina: *Journal of Paleontology*, v. 88, no. 5, p. 925-947.
- Twitchett, R. J., Feinberg, J. M., O'Connor, D. D., Alvarez, W., and McCollum, L. B., 2005, Early Triassic ophiuroids: their paleoecology, taphonomy, and distribution: *Palaaios*, v. 20, no. 3, p. 213-223.
- Twitchett, R. J., Looy, C. V., Morante, R., Visscher, H., and Wignall, P. B., 2001, Rapid and synchronous collapse of marine and terrestrial ecosystems during the end-Permian biotic crisis: *Geology*, v. 29, no. 4, p. 351-354.
- Upadhyay, R., and Parcha, S. K., 2012, Ichnofossils from the Jadhganga (Nelang) valley, Uttarakashi district, Garhwal Tethys Himalaya, India: *Himalayan Geology*, v. 33, no. 1, p. 83-88.
- Utting, J., Zonneveld, J. P., MacNaughton, R. B., and Fallas, K. M., 2005, Palynostratigraphy, lithostratigraphy and thermal maturity of the Lower Triassic Toad and Grayling, and Montney formations of western Canada, and comparisons with coeval rocks of the Sverdrup Basin, Nunavut: *Bulletin of Canadian Petroleum Geology*, v. 53, no. 1, p. 5-24.

- Van Tassell, J., 1987, Upper Devonian Catskill Delta margin cyclic sedimentation: Brallier, Scherr, and Foreknobs Formations of Virginia and West Virginia: Geological Society of America Bulletin, v. 99, p. 414-426.
- Varban, B. L., and Plint, A. G., 2005, Allostratigraphy of the Kaskapau Formation (Cenomanian-Turonian) in the subsurface and outcrop: NE British Columbia and NW Alberta, Western Canada Foreland Basin: Bulletin of Canadian Petroleum Geology, v. 53, no. 4, p. 357-389.
- Veiga, G. D., Howell, J. A., and Strömbäck, A., 2005, Anatomy of a mixed marine-non-marine lowstand wedge in a ramp setting. The record of a Barremian-Aptian complex relative sea-level fall in the central Neuquén Basin, Argentina, *in* Veiga, G. D., Spalletti, L. A., Howell, J. A., and Schwarz, E., eds., The Neuquén Basin, Argentina: A Case Study in Sequence Stratigraphy and Basin Dynamics: London, The Geological Society of London, p. 139-162.
- Vennin, E., Olivier, N., Brayard, A., Bour, I., Thomazo, C., Escarguel, G., Fara, E., Bylund, K. G., Jenks, J. F., Stephen, D. A., and Hofmann, R., 2015, Microbial deposits in the aftermath of the end-Permian mass extinction: A diverging case from the Mineral Mountains (Utah, USA): Sedimentology, v. 62, no. 3, p. 753-792.
- Villeneuve, M., and Komara, S., 1991, Lower Paleozoic transgressions and regressions in the Bové Basin (Guinea and Guinea-Bissau - Africa). Stratigraphic, sedimentologic and paleogeographic data: Journal of African Earth Sciences, v. 12, no. 1-2, p. 67-77.
- Vincent, S. J., Allen, M. B., Ismail-Zadeh, A. D., Flecker, R., Foland, K. A., and Simmons, M. D., 2005, Insights from the Talysh of Azerbaijan into the Paleogene evolution of the South Caspian region: Geological Society of America Bulletin, v. 117, no. 11-12, p. 1513-1533.
- Vinn, O., and Toom, U., 2016, Rare tool marks from the Upper Ordovician of Estonia (Baltica): Neues Jahrbuch für Geologie und Paläontologie-Abhandlungen, v. 281, no. 3, p. 221-226.
- Vos, R. G., 1981, Sedimentology of an Ordovician fan delta complex, western Libya: Sedimentary Geology, v. 29, no. 2-3, p. 153-170.
- Waggoner, B. M., and Collins, A. G., 1995, A new chondrophorina (Cnidaria, Hydrozoa) from the Cadiz Formation (Middle Cambrian) of California: Paläontologische Zeitschrift, v. 69, p. 7-17.
- Wall, P.D., Ivany, L.C., and Wilkinson, B.H., 2009, Revisiting Raup: exploring the influence of outcrop area on diversity in light of modern sample-standardization techniques: Paleobiology, v. 35, p. 146-167, <https://doi.org/10.1666/07069.1>.
- Wang, J. H., Xie, X. N., Pang, X., and Liu, B. J., 2017, Storm-reworked shallow-marine fans in the Middle Triassic Baise area, South China: Sedimentary Geology, v. 349, p. 33-45.
- Waters, C. N., Chisholm, J. I., Benfield, A. C., and O'Beirne, A. M., 2008, Regional evolution of a fluviodeltaic cyclic succession in the Marsdenian (late Namurian Stage, Pennsylvanian) of the central Pennine Basin, UK: Proceedings of the Yorkshire Geological Society, v. 57, no. 1, p. 1-28.
- Wetzel, A., and Meyer, C. A., 2006, The dangers of high-rise living on a muddy seafloor: an example of crinoids from shallow-water mudstones (Aalenian, northern Switzerland): Palaios, v. 21, no. 2, p. 155-167.
- Whitaker, J. H. M., 1982, Cretaceous-Palaeogene geology of Southwest Japan: Proceedings of the Geologists' Association, v. 93, no. 2, p. 147-160.

- Whitehead, J., 2001, Geology of the Fredericton-Mactaquac Dam area: NEIGC Field Guide, p. A1-A11.
- Wiese, F., 2009, The Söhlde Formation (Cenomanian, Turonian) of NW Germany: shallow marine pelagic red beds, *in* Hu, X., Wang, C., Scott, R. W., Wagreich, M., and Jansa, L., eds., *Cretaceous Oceanic Red Beds: Stratigraphy, Composition, Origins, and Paleooceanographic and Paleoclimatic Significance*: Tulsa, Oklahoma, SEPM, p. 153-170.
- Wignall, P. B., 1989, Sedimentary dynamics of the Kimmeridge Clay: tempests and earthquakes: *Journal of the Geological Society, London*, v. 146, p. 273-284.
- Wignall, P. B., Bond, D. P. G., Sun, Y. D., Grasby, S. E., Beauchamp, B., Joachimski, M. M., and Blomeier, D. P. G., 2016, Ultra-shallow-marine anoxia in an Early Triassic shallow-marine clastic ramp (Spitsbergen) and the suppression of benthic radiation: *Geological Magazine*, v. 153, no. 2, p. 316-331.
- Wignall, P. B., and Twitchett, R. J., 1999, Unusual intraclastic limestones in Lower Triassic carbonates and their bearing on the aftermath of the end-Permian mass extinction: *Sedimentology*, v. 46, no. 2, p. 303-316.
- Wilson, H. M., Daeschler, E. B., and Desbiens, S., 2005, New flat-backed Archipolypodan millipedes from the Upper Devonian of North America: *Journal of Paleontology*, v. 79, no. 4, p. 738-744.
- Wonham, J. P., Johnson, H. D., Mutterlose, J., Stadtler, A., and Ruffell, A., 1997, Characterization of a shallow marine sandstone reservoir in a syn-rift setting: the Bentheim Sandstone formation (Valanginian) of the Rühlermoor field, lower Saxony Basin, NW Germany, *Shallow Marine and Nonmarine Reservoirs, Sequence Stratigraphy, Reservoir Architecture, and Production Characteristics: 18th Annual Research Conference, Gulf Coast Association of Geological Societies, GCSSEPM*, p. 427-448.
- Woodrow, D. L., 1963, Post-Rhinestreet stratigraphy in the Sayre and Towanda Quadrangles, Pennsylvania: a progress report, *in* Shepps, V. C., ed., *Symposium on Middle and Upper Devonian Stratigraphy of Pennsylvania and Adjacent States*: Harrisburg, PA, Pennsylvania Geological Survey, p. 79-85.
- Wright, A. D., and Benton, M. J., 1987, Trace fossils from Rhaetic shore-face deposits of Staffordshire: *Palaeontology*, v. 30, no. 2, p. 407-428.
- Yan, Z., Wang, Z. Q., Yan, Q. R., Wang, T., Xiao, W. J., Li, J. L., Han, F. L., Chen, J. L., and Yang, Y. C., 2006, Devonian sedimentary environments and provenance of the Qinling orogen: Constraints on late Paleozoic southward accretionary tectonics of the North China craton: *International Geology Review*, v. 48, no. 7, p. 585-618.
- Yao, W.-H., and Li, Z.-X., 2016, Tectonostratigraphic history of the Ediacaran-Silurian Nanhua foreland basin in South China: *Tectonophysics*, v. 674, p. 31-51.
- York, C. C., Painter, C. S., and Carrapa, B., 2011, Sedimentological characterization of the Sego Sandstone (NW Colorado, USA): a new scheme to recognize ancient flood-tidal-delta deposits and implications for reservoir potential: *Journal of Sedimentary Research*, v. 81, no. 5-6, p. 401-419.
- Zhang, L.-J., 2014, Lower Devonian tempestites in western Yangtze, South China: insight from *Zoophycos* ichnofabrics: *Geological Journal*, v. 49, no. 2, p. 177-187.
- Zhang, S., Barnes, C. R., and Pohler, S. M. L., 2002, Relationships between lithofacies belts and conodont faunas, Gun River Formation (Lower Silurian), Anticosti Island, Quebec: a statistical approach: *Canadian Journal of Earth Sciences*, v. 39, no. 12, p. 1767-1782.

- Zhao, J. H., Lin, C. S., Liu, J. Y., Yang, H. J., and Cai, Z. Z., 2016, Sedimentary facies and sequence stratigraphy of the Silurian at Tabei uplift, Tarim Basin, China: *Arabian Journal of Geosciences*, v. 9, p. 1-24.
- Zonneveld, J.-P., MacNaughton, R. B., Utting, J., Beatty, T. W., Pemberton, S. G., and Henderson, C. M., 2010a, Sedimentology and ichnology of the Lower Triassic Montney Formation in the Pedigree-Ring/Border-Kahntah River area, northwestern Alberta and northeastern British Columbia: *Bulletin of Canadian Petroleum Geology*, v. 58, no. 2, p. 115-140.
- Zonneveld, J. P., Gingras, M. K., and Beatty, T. W., 2010b, Diverse ichnofossil assemblages following the P-T mass extinction, Lower Triassic, Alberta and British Columbia, Canada: evidence for shallow marine refugia on the northwestern coast of Pangaea: *Palaios*, v. 25, no. 5-6, p. 368-392.
- Zuschin, M., Harzhauser, M., and Mandic, O., 2005, Influence of size-sorting on diversity estimates from tempestitic shell beds in the middle Miocene of Austria: *Palaios*, v. 20, no. 2, p. 142-158.
